# Supplementary material
Source: ML conference proceedings conference paper supplement (https://aclanthology.org/2023.trustnlp-1.26)
Supplement: SupplementaryMaterial [file 2023.trustnlp-1.26.SupplementaryMaterial.zip]

## Prolific ID

Please enter your Prolific ID here.

## Social Media and Language Preference

1. Please select the appropriate answer about your usage of the following social media sites.

Twitter

Instagram

Facebook

Snapchat

YouTube

WhatsApp

Pinterest

## Survey Questionnaires

LinkedIn

Reddit

TikTok

Tumblr

WeChat

2. Which social media do you have account(s) where you frequently post?

Facebook

Instagram

Twitter

Tumblr

TikTok

WeChat

WhatsApp

Pinterest

Reddit

SnapChat

YouTube

LinkedIn

None

### 3. How often do you post on social media?

Never / not anymore

Less than once a month

A few times a month

About once a week

A few times a week

Almost everyday

More than once per day

### 4. Have you ever written a post on social media in a language other than English?

Yes

No

### 5. On average, how often do you write posts on social media in a language other than English?

Never

Rarely

Sometimes

Very often

Always

6. What language(s) do you use when you post on social media?  
Please answer n/a in the boxes where you don't have language to add.

Language 1

Language 2

Language 3 (optional)

Language 4 (optional)

Language 5 (optional)

Language 6 (optional)

7. Do you set language preferences in your social media accounts?

Yes

No

I don't know

8. What language(s) have you selected for your social media account(s)?

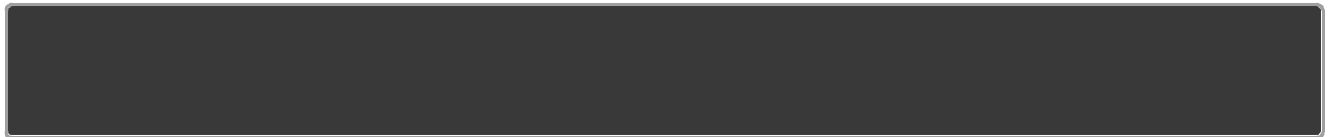

## Machine Translation

9.

**Post without translation**

**Post with machine translation**

**Note: These example posts are deleted because they included information related to authors**

This is an example of machine translation on Facebook. Facebook translates post(s) that are not in the same language as the user's language setting.

## 10. How familiar are you with machine translation?

I have never heard of it before

I have heard of it but I am not familiar with it

I am somewhat familiar with it

I am very familiar with it

## 11. Have you ever read machine-translated posts on social media?

Yes

No

I am not sure

## 12. What do you think of the quality of the machine translation of the posts that you have seen?

Very poor

Poor

Neutral

Good

Very good

## 13. How useful do you think machine translation is for social media?

Completely useless

Somewhat useless

Neutral

Somewhat useful

Completely useful

14. How accurate do you think machine translation is in terms of actual meaning?

Extremely inaccurate

Inaccurate

Slightly inaccurate

Neutral

Slightly accurate

Accurate

Extremely accurate

15. How accurate do you think machine translation is in terms of connotation or nuance?

Extremely inaccurate

Inaccurate

Slightly inaccurate

Neutral

Slightly accurate

Accurate

Extremely accurate

## **Sensitive Posts**

16. What are some examples of misuse of a sensitive post (status update)?

17. Do you ever post on social media about any of the following topics?

|                         | Never                 | Rarely                | Sometimes             | Very often            | Always                |
|-------------------------|-----------------------|-----------------------|-----------------------|-----------------------|-----------------------|
| Politics                | <input type="radio"/> |
| Religion                | <input type="radio"/> |
| Your personal opinions  | <input type="radio"/> |
| Health issues           | <input type="radio"/> |
| Mental health issues    | <input type="radio"/> |
| Relationship issues     | <input type="radio"/> |
| Financial problems      | <input type="radio"/> |
| Problems at school/work | <input type="radio"/> |
| Posts with curse words  | <input type="radio"/> |
| Posts made in anger     | <input type="radio"/> |



18. Let's suppose you wrote a sensitive post (status update), for example, about one of the topics listed above. Would you be worried about this post being **misinterpreted**?

Not worried at all

Somewhat worried

Worried

Very worried

19. Let's suppose you wrote a sensitive post (status update), for example, about one of the topics listed above. Would you be worried about this post being **misused**?

Not worried at all

Somewhat worried

Worried

Very worried

20. Are you currently worried about any of your existing posts (status updates) being misused?

Not worried at all

Somewhat worried

Worried

Very worried

21. Can you please explain briefly why would you be worried about any of your existing post(s)? What was/were the topic of that post(s)? If you do not prefer to answer this question, please write n/a.

## Categories of Sensitive Posts

22. Have you ever posted a status update on social media and NOT wanted it to be translated to another language out of concern that it could be **misused**?

Yes

No

I am not sure

23. Can you share an example of such status update? (You can copy a status update from your social media and paste it here. If possible, please provide an English translation of it.)

24. Have you ever posted a status update on social media and NOT wanted it to be translated to another language out of concern that it could be **misinterpreted**?

Yes

No

I am not sure

25. Can you share an example of such status update? (You can copy a status update from your social media and paste it here. If possible, please provide an English translation of it.)

26. Have you ever posted a status update on social media and NOT wanted it to be translated to another language because it was **sensitive**?

Yes

No

I am not sure

27. Can you share an example of such status update? (You can copy a status update from your social media and paste it here. If possible, please provide an English translation of it.)

28. Have you ever posted on social media in a particular language in order to target a specific audience?

Yes

No

I am not sure

29. Can you share an example of such status update? (You can copy a status update from your social media and paste it here. If possible, please provide an English translation of it.)

30. Why did you want to target a specific language user with this status? Please describe briefly.

## Control on Translation

31. Please answer to what extent you agree with the following statement:

I would be upset if I wrote a post about a sensitive topic and that post was translated into a different language.

Completely disagree

Somewhat disagree

Neutral

Somewhat agree

Completely agree

32. If a sensitive post I wrote in one language was translated into another language, it could have a negative impact on my **professional** life.

Completely disagree

Somewhat disagree

Neutral

Somewhat agree

Completely agree

33. If a sensitive post I wrote in one language was translated into another language, it could have a negative impact on my **personal** life.

Completely disagree

Somewhat disagree

Neutral

Somewhat agree

Completely agree

34. I would like to have more control over how my social media posts are translated.

Completely disagree

Somewhat disagree

Neutral

Somewhat agree

Completely agree

35. I want my posts to be translated every time I post anything on social media.

Completely disagree

Somewhat disagree

Neutral

Somewhat agree

Completely agree

36. I would like to translate my social media posts myself.

Completely disagree

Somewhat disagree

Neutral

Somewhat agree

Completely agree

37. I would like to read and edit the machine translation of my social media posts prior to sharing them.

Completely disagree

Somewhat disagree

Neutral

Somewhat agree

Completely agree

38. Do you change the language of the post depending on the topic?

Never

Rarely

Sometimes

Very often

Always

## Demographic Information

39. What is your gender?

Man

Woman

Non-binary

Prefer to self-describe

Prefer not to answer

40. How old are you?

18-24

25-29

30-34

35-39

40-44

45-49

50-54

55-59

60-64

65-69

70 and above

Prefer not to answer

#### 41. What language(s) do you use regularly?

Language 1

Language 2

Language 3 (optional)

Language 4 (optional)

Language 5 (optional)

Language 6 (optional)

42. What is your country of birth? (Please enter N/A if you do not want to answer this question.)

43. If your country of birth is not the US, how long have you been in the US? (Please enter N/A if you do not want to answer this question.)
