# Supplementary material
Source: ML conference proceedings conference paper supplement (https://aclanthology.org/2023.trustnlp-1.26)
Supplement: SupplementaryMaterial [file Integrated_exp_data_original.xlsx]

## Sheet: Integrated_exp_data
Participant_ID	Grow_up_lang1	Grow_up_lang2	Grow_up_lang3	Grow_up_lang4	Grow_up_lang5	Grow_up_lang6	Grow_up_lang7	Most_using_lang1	Most_using_lang2	Most_using_lang3	Most_using_lang4	Twitter	Facebook	Instagram	Whatsapp	Snapchat	YouTube	WeChat	Reddit	LinkedIn	Pinterest	TikTok	Tumblr	Seen_or_read_MT_SM_post	Used_MT.	Services_apps_used1	Services_apps_used2					Language_chosen	language_used	Condition	prompt_less_sens	less_senstive_post	translation_less_senstive_post	include_or_not_include_translation_less_sense	prompt_high_sens	high_senstive_post	translation_high_senstive_post	include_or_not_include_translation_high_sense	Pid_analysis	Notes	Anything_wrong.	Exp_conditions	PC1	PC2	PC3
54f8b0cdfdf99b5396a7d0a2	English	Spanish	Portuguese					English	Spanish	Portuguese		Currently use it heavily	Currently use it, but occasionally	Used it occasionally in the past but have stopped	Never Used it	Used it occasionally in the past but have stopped	Currently use it heavily	Never Used it	Currently use it, but occasionally	Currently use it, but occasionally	Currently use it, but occasionally	Never Used it	Never Used it	Yes	Yes	Google translate	Microsoft Translator/Bing Translator	Systran	logos	Globalink	Assist	Portugese	pt	Only MT	about an unusal travel experience that you had.	Em uma viagem Ã Europa hÃ¡ muitos anos, tive uma experiÃªncia incomum. Eu encontrei meu primo brasileiro na rua. Em Madrid. Eu nÃ£o sabia que ele estava lÃ¡. Foi uma surpresa maravilhosa.\n	On a trip to Europe many years ago, I had an unusual experience. I met my Brazilian cousin on the street. In Madrid. I didn't know he was there. It was a wonderful surprise.\n	yes	about a bad experience with an employer or teacher.	A maioria das experiÃªncias na escola foram boas. \nUm professor deu muito dever de casa. Todos os dias. Era ridÃ­culo.\nFiquei tÃ£o feliz quando aquela aula acabou.	Most school experiences were good.\nA teacher gave a lot of homework. Every day. It was ridiculous.\nI was so happy when that class ended.	yes	P92	Good	all went well.	only_MT	Agree	Neutral	Neutral
55a5f19bfdf99b28b5340d00	English	Spanish	French					English				Currently use it, but occasionally	Currently use it, but occasionally	Currently use it, but occasionally	Never Used it	Never Used it	Currently use it heavily	Never Used it	Currently use it, but occasionally	Never Used it	Currently use it, but occasionally	Never Used it	Never Used it	I am not sure	Yes	google translate						Spanish	es	Manual	about a funny situation where you were distracted by your mobile phone.	Se me olvido que tenÃ­a el telÃ©fono en el bolsillo y su vibraciÃ³n me hizo sobresaltar tanto que escupÃ­ la bebida que tenia en la boca en la cara de mi hermano.	I forgot I had the phone in my pocket and its vibration startled me so much that I spat out the drink I had in my mouth onto my brother's face.	yes	about a bad experience with an employer or teacher.	My jefe se olvido de subirse el cierre de los pantalones cuando salio del bano y vi su ropa interior todo el dia	My boss forgot to zip up his pants when he exited the bathroom and I saw his underwear all day	yes	P144	Great info	no, everything worked fine.	manual_translation	Agree	Strongly disagree	Neutral
55b42b7cfdf99b5244217cf4	English	Spanish						English	Spanish			Used it occasionally in the past but have stopped	Currently use it, but occasionally	Used it occasionally in the past but have stopped	Currently use it, but occasionally	Never Used it	Currently use it heavily	Never Used it	Currently use it, but occasionally	Used it occasionally in the past but have stopped	Used it occasionally in the past but have stopped	Never Used it	Never Used it	Yes	Yes	Google Translate						Greek	el	Manual	about a bad retail experience you recently had.	ÎˆÏ‡Î¿Î½Ï„Î±Ï‚ Î±Ï…Ï„ÏŒ Ï„Î¿ ÎµÎ¯Î´Î¿Ï‚ Ï„Î¿Ï… ÏƒÏ„Î¿Î¹Ï‡ÎµÎ¯Î¿Ï… ÎµÎ¯Î½Î±Î¹ Î»Î¹Î³ÏŒÏ„...	This kind of item maybe have less interest.	yes	"about a heated argument you recently had with a family member."	"ÎœÎ¹ÏƒÏŽ Ï€Î¿Ï… Î¿ Î¼Ï€Î±Î¼Ï€Î¬Ï‚ Î¼Î¿Ï… Ï€ÏÎ¿ÏƒÎ²Î¬Î»Î»ÎµÎ¹ Ï„Î¿Î½ Î¬Î½Ï„ÏÎ± Î¼Î¿Ï… ÎºÎ¿Î½Ï„Î¬ ÏƒÏ„Î·Î½ Î·Î¼Î­ÏÎ± Ï„Î¿Ï… Î³Î¬Î¼Î¿Ï… Î¼Î±Ï‚."	"I despise the fact that my Dad would speak ill of my husband close to our wedding day."	yes	P39	good	N/A	MT_with_edit	Neutral	Agree	Somewhat agree
55b6e53bfdf99b438f10e3bb	english	Spanish	Chinese	Korean	Tagalog	Ilocano	Japanese	English	tagalog	ilocano		Currently use it heavily	Currently use it heavily	Currently use it heavily	Currently use it heavily	Never Used it	Currently use it heavily	Never Used it	Currently use it, but occasionally	Currently use it, but occasionally	Currently use it heavily	Currently use it, but occasionally	Currently use it, but occasionally	Yes	Yes	google translate						Tagalog	tl	Only MT	about a funny situation where you were distracted by your mobile phone.	Natamaan ko ang noo ko sa glass door sa harap ng mga kaibigan ko!	I hit my forehead on the glass door in front of my friends!	yes	explaining your opinion about a political controversy.	Ang salungatan sa pulitika ay nakaka-stress na pag-usapan kapag sinusubukan mong mag-relax.	Political conflict is stressful to talk about when youâ€™re trying to relax.	yes	P89	Good	none	only_MT	Neutral	Somewhat agree	Somewhat disagree
55d10258a392570012ea105b	English	Spanish	French					English	Spanish			Used it occasionally in the past but have stopped	Currently use it, but occasionally	Currently use it heavily	Used it occasionally in the past but have stopped	Never Used it	Used it occasionally in the past but have stopped	Never Used it	Currently use it, but occasionally	Used it occasionally in the past but have stopped	Never Used it	Used it occasionally in the past but have stopped	Never Used it	Yes	Yes	google translate						Spanish	es	MT with edit	about a funny situation where you were distracted by your mobile phone.	Estaba distraida en el metro. Cuando leyendo en mi telÃ©fono, perdÃ­ mi parado.	I was distracted on the subway. When reading on my phone, I missed my stop.	yes	about a bad experience with an employer or teacher.	Mi jefe es un monstruo. El nunca deja de acechar	My boss is a monster. He never stops talking.	yes	P63	good	no	MT_with_edit	Somewhat disagree	Somewhat agree	Somewhat disagree
55d35447da14d7000e95318f	English							English				Currently use it, but occasionally	Used it heavily in the past but have stopped	Currently use it heavily	Never Used it	Used it occasionally in the past but have stopped	Currently use it heavily	Never Used it	Currently use it, but occasionally	Used it occasionally in the past but have stopped	Never Used it	Currently use it heavily	Never Used it	No	No							Spanish	es	MT with edit	about an unusal travel experience that you had.	Acabo de ir a CanadÃ¡ por primera vez, vi muchas cosas geniales, incluidos osos grandes.	I just went to Canada for the first time, saw a lot of cool stuff including big bears.	yes	about a bad experience with an employer or teacher.	Solo le pedÃ­ a mi supervisor un dÃ­a libre pero, por supuesto, ella lo negÃ³.	I just asked my supervisor for a day off, but of course she denied it.	yes	P125	Good info	No	only_MT	Somewhat agree	Somewhat disagree	Neutral
56270b0dddff3c0005bcd882	English	Spanish						English	Spanish			Currently use it, but occasionally	Currently use it heavily	Currently use it heavily	Never Used it	Never Used it	Currently use it heavily	Never Used it	Currently use it heavily	Currently use it, but occasionally	Currently use it, but occasionally	Never Used it	Currently use it, but occasionally	Yes	Yes	Google Translate						Spanish	es	Only MT	about an unusal travel experience that you had.	Cuando lleguÃ© a Seattle, habÃ­a una mujer gritandole a todo el mundo fuera del aeropuerto, me perdÃ­ en camino al hotel y un extraÃ±o amable me regalÃ³ una manzana.	When I got to Seattle, there was a woman yelling at everyone outside the airport, I got lost on the way to the hotel, and a nice stranger gave me an apple.	yes	explaining your opinion about a political controversy.	Con respecto al aborto, creo que las mujeres deberÃ­an tener el derecho a tomar decisiones sobre sÃ­ mismas y sus cuerpos. Los polÃ­ticos no deberÃ­an usar creencias religiosas para hacer decisiones por ellas.	Regarding abortion, I believe that women should have the right to make decisions about themselves and their bodies. Politicians should not use religious beliefs to make decisions for them.	yes	P213	Great info	I had no problems.	only_MT	Somewhat agree	Agree	Disagree
562be0d4733ea00011162e31	English	Korean						English				Used it occasionally in the past but have stopped	Currently use it, but occasionally	Currently use it, but occasionally	Never Used it	Used it occasionally in the past but have stopped	Currently use it heavily	Never Used it	Currently use it heavily	Never Used it	Never Used it	Never Used it	Used it heavily in the past but have stopped	I am not sure	Yes	Google Translate	some other app that automatically translated what I was playing to English					Korean	kr	MT with edit	about a funny situation where you were distracted by your mobile phone.	ì™€ ì „í™”ë³´ë‹¤ê°€ ë¼ë©´ì„ ì•ˆë¨¹ì—‡ì–´	Wow, I didn't eat ramen over the phone	no	about a heated argument you recently had with a family member.	ì•„ ì§„ì§œ ë”¸ì´ ë§‰ëŒ€ë“œë¥´ë‚´... ë„ˆë¬´íž˜ë“¤ë‹¤	Oh really, my daughter is pulling a stick... It's so hard	yes	P104	good	None	MT_with_edit	Neutral	Neutral	Somewhat agree
573d2c73cc30e7000ec522ab	English	Hindi	Malayalam	Arabic				English	Malayalam			Currently use it heavily	Used it heavily in the past but have stopped	Currently use it, but occasionally	Never Used it	Never Used it	Currently use it heavily	Never Used it	Currently use it heavily	Currently use it, but occasionally	Currently use it, but occasionally	Currently use it, but occasionally	Currently use it, but occasionally	No	Yes	Google Translate	DeepL					Hindi	hi	MT with edit	about something funny that happened to you during a meeting.	à¤†à¤œ, à¤®à¥‡à¤°à¥‡ à¤ªà¤°à¥à¤¯à¤µà¥‡à¤•à¥à¤·à¤• à¤¨à¥‡ à¤à¤• à¤šà¥à¤Ÿà¤•à¥à¤²à¤¾ à¤¸à¥à¤¨à¤¾à¤¯à¤¾ à¤œà¤¿à¤¸à¤¸à¥‡ à¤®à¥à¤à¥‡ à¤¹à¤‚à¤¸à¥€ à¤† à¤—à¤ˆà¥¤	Today, my supervisor told a joke that made me laugh.	yes	about a heated argument you recently had with a family member.	à¤®à¥‡à¤°à¥‡ à¤ªà¤¿à¤¤à¤¾à¤œà¥€ à¤¨à¥‡ à¤à¤• à¤–à¤¾à¤°à¤¿à¤œ à¤•à¤°à¤¨à¥‡ à¤µà¤¾à¤²à¥€ à¤Ÿà¤¿à¤ªà¥à¤ªà¤£à¥€ à¤•à¥€ à¤œà¤¿à¤¸à¤¸à¥‡ à¤®à¥à¤à¥‡ à¤—à¥à¤¸à¥à¤¸à¤¾ à¤†à¤¯à¤¾à¥¤ à¤¹à¤® à¤à¤• à¤¤à¤°à¥à¤• à¤®à¥‡à¤‚ à¤ªà¤¡à¤¼ à¤—à¤ à¤œà¤¹à¤¾à¤ à¤¹à¤® à¤à¤• à¤¦à¥‚à¤¸à¤°à¥‡ à¤ªà¤° à¤šà¤¿à¤²à¥à¤²à¤¾à¤	My dad made a dismissive comment that angered me. We got into an argument where we yelled at each other	yes	P123	Good info	No	MT_with_edit	Somewhat agree	Somewhat agree	Somewhat agree
5a5bff49acc75b00017a6009	English	Spanish						English	Spanish			Currently use it heavily	Currently use it heavily	Currently use it heavily	Currently use it heavily	Currently use it, but occasionally	Currently use it heavily	Used it heavily in the past but have stopped	Currently use it heavily	Currently use it heavily	Currently use it, but occasionally	Currently use it heavily	Currently use it, but occasionally	Yes	Yes	Google translate						Spanish		only MT	"about a funny situation where you were distracted by your mobile phone."	"Una vez iba caminando por la casa y estaba tan atento a un vÃ­deo gracioso que estaba viendo en mi mÃ³vil que termine tropezando con una silla y cayendo lentamente al piso, todos se rieron de mi y la verdad fue gracioso"	"Once I was walking around the house and I was so attentive to a funny video I was watching on my mobile that I ended up tripping over a chair and slowly falling to the floor, everyone laughed at me and it was really funny"	yes	"about a bad experience with an employer or teacher."	"Tuve una muy mala experiencia con una maestra de clase de filosofia porque teniamos pensamientos diferentes y ella no aceptaba mi forma de ver las cosas, le dije que lo que decia era contradictorio a lo que enseÃ±aba porque era mi forma de razonar sobre esa idea, asÃ­ que sostuve mi pensamiento"	"I had a very bad experience with a philosophy class teacher because we had different thoughts and she did not accept my way of seeing things, I told her that what she said was contradictory to what she taught because it was my way of reasoning about that idea, so that held my thought"	yes	P1	Great info	Everything was really good and it was very clear, I could understand it easily and carry out the activity that was really interesting	MT_with_edit	Disagree	Strongly agree	Agree
5a638189c0d836000107b798	English	Chinese	Mandarin	Indonesian	Malay			English	Mandarin			Currently use it, but occasionally	Currently use it, but occasionally	Currently use it, but occasionally	Currently use it, but occasionally	Currently use it, but occasionally	Currently use it heavily	Currently use it, but occasionally	Currently use it, but occasionally	Currently use it, but occasionally	Used it heavily in the past but have stopped	Currently use it, but occasionally	Used it occasionally in the past but have stopped	I am not sure	No							Mandarin	zh-TW	MT with edit	about a funny situation where you were distracted by your mobile phone.	æœ‰å…©éš»è±¬æ˜¯å®¶é¤Šå¯µç‰©, å®ƒå€‘ç²˜åœ¨ä¸€èµ·ç«™åœ¨å¤§æ¨“å‰å› ç‚ºä»–å€‘å‰›å¾žç«ç½ä¸­é€ƒå‡ºä¾†ã€‚æˆ‘å¾ˆæ„›ä»–å€‘å› ç‚ºä»–å€‘çœ‹èµ·ä¾†å¥½å¯æ„›ã€‚äººé¡žæ‡‰è©²å­¸æœƒä»–å€‘çš„åœ˜çµäº’åŠ©çš„è¡Œç‚ºã€‚	There are two pigs that are domestic pets and they are standing together in front of the building because they have just escaped from a fire. I love them because they look so cute. Humans should learn their act of solidarity.	yes	explaining your opinion about a political controversy.	åœ¨ä¸­æ–‡æœ‰é™°å’Œé™½çš„å¹³è¡¡ç†è«–ã€‚åœ¨æ”¿æ²»ä¸Šç¸½æ˜¯æœ‰æ”¿æ²»çˆ­è­°, ä½†æˆ‘å€‘æ‡‰è©²æŠŠäººæ°‘åˆ©ç›Šä½œç‚ºç¬¬ä¸€é¸æ“‡ä¸¦æ•™å°Žäººå€‘æ„›ã€å’Œå¹³èˆ‡å’Œè«§ã€‚å› ç‚ºå’Œè«§æœ‰åŠ©æ–¼åœ˜çµï¼Œåœ˜çµæœ‰åŠ©æ–¼åŠ›é‡ã€‚æ‰€ä»¥åœ‹å®¶å°‡ç¹æ¦®æ˜Œç››ã€‚	In Chinese there is the balance theory of yin and yang. There are always political disputes in politics, but we should put people's interests first and teach people love, peace and harmony. Because harmony helps unity, and unity helps strength. So the country will prosper and prosper.	yes	P91	ok	No.	MT_with_edit	Somewhat disagree	Somewhat agree	Somewhat disagree
5a8d8079190420000156435d	English	Spanish	Greek					English	Greek			Currently use it heavily	Currently use it heavily	Currently use it, but occasionally	Used it occasionally in the past but have stopped	Used it occasionally in the past but have stopped	Currently use it heavily	Never Used it	Currently use it heavily	Currently use it, but occasionally	Used it occasionally in the past but have stopped	Used it occasionally in the past but have stopped	Used it occasionally in the past but have stopped	Yes	Yes	Google Translate						Greek	gr	Manual	about a bad retail experience you recently had.	ÎœÏŒÎ»Î¹Ï‚ Î¼Îµ ÎµÎ¾Î±Ï€Î¬Ï„Î·ÏƒÎ±Î½ Ï„Î¿ Amazon. Î‘Î³ÏŒÏÎ±ÏƒÎ± Î­Î½Î± 6 Ï€Î±ÎºÎ­Ï„Î¿ ÎºÎ¬Ï„Î¹ ÎºÎ±Î¹ Î¼Î¿Ï… Î­ÏƒÏ„ÎµÎ¹Î»Î±Î½ Î¼ÏŒÎ½Î¿ 2. Î¤ÏŒÏ„Îµ Î´ÎµÎ½ Î¼Î¿Ï… ÎµÏ€Î­ÏƒÏ„ÏÎµÏ†Î±Î½. ÎÎ± ÎºÎ±Î»Î­ÏƒÏ‰ Ï„Î·Î½ Î±ÏƒÏ„Ï…Î½Î¿Î¼Î¯Î± Î® Ï„Î¿Î½ Ï€ÏÏŒÎµÎ´ÏÎ¿	I Just got scammed by amazon. I bought a 6 pack some something and they only sent 2. Then they wouldn't refund me. Should I call the police or the president?	yes	explaining your opinion about a political controversy.	Î Î¿Î»Î»Î¿Î¯ Î¬Î½Î¸ÏÏ‰Ï€Î¿Î¹ ÎµÎ¯Î½Î±Î¹ Î¸Ï…Î¼Ï‰Î¼Î­Î½Î¿Î¹ Î¼Îµ Ï„Î¿Î½ ÏƒÎ·Î¼ÎµÏÎ¹Î½ÏŒ Ï€ÏÏŒÎµÎ´ÏÎ¿ ÎºÎ±Î¹ Î¼Îµ Î±Ï…Ï„ÏŒ Ï€Î¿Ï… ÎºÎ¬Î½ÎµÎ¹. ÎœÎ¬Î»Î»Î¿Î½ Ï„Î¹ Î´ÎµÎ½ ÎºÎ¬Î½ÎµÎ¹. Î‘ÎºÏ…ÏÏŽÏƒÏ„Îµ Î®Î´Î· Ï„Î¿ Ï‡ÏÎ­Î¿Ï‚ Ï„Ï‰Î½ Ï†Î¿Î¹Ï„Î·Ï„ÏŽÎ½ ÎºÎ±Î¹ Î»Î¬Î²ÎµÏ„Îµ ÎºÎ¬Ï€Î¿Î¹Î± Î±Î½Î±Î³ÎºÎ±Î¯Î± Ï…Ï€Î¿ÏƒÏ„Î®ÏÎ¹Î¾Î· ÎºÎ±Î¹ ÏˆÎ®Ï†Î¿Ï…Ï‚ ÎµÎ¾Î±Î¹Ï„Î¯Î±Ï‚ Î±Ï…Ï„Î¿Ï.	A lot of people are angry about the current president and what he's been doing. Rather what he is not doing. Cancel student debt already and get some much needed support and votes because of it.	yes	P108	great info	no, everything went smoothly	manual_translation	Disagree	Neutral	Disagree
5ad93fa080491c000142d619	English	Spanish						English	Spanish	Hungarian		Currently use it heavily	Used it occasionally in the past but have stopped	Currently use it, but occasionally	Currently use it, but occasionally	Currently use it, but occasionally	Currently use it heavily	Never Used it	Used it occasionally in the past but have stopped	Never Used it	Currently use it, but occasionally	Currently use it heavily	Currently use it, but occasionally	Yes	Yes	Google Translate	Yandex Translate	DeepL				Spanish	es	Manual	about a funny situation where you were distracted by your mobile phone.	Estaba en un restaurante y estaba mirando al menu. HabÃ­a una linea muy larga asÃ­ que me puse a leer mi mensajes. Cuando llego mi turno, no supe que elegir, asÃ­ que dige que sÃ­ a alguna pregunta. Estoy feliz que eso paso porque la comida era deliciosa y no la hubiera escogido.	I was at a restaurant and I was looking at the menu. There was a very long line so I went ahead and read my messages. When my turn came, I didn't know what to choose, so I said y es to a question. I am happy that that happened because the food was delicious and I would not have chosen it.	yes	about a heated argument you recently had with a family member.	Me peleÃ© con mi hermano el otro dia porque otra vez dejo el baÃ±o bien sucio. Odio que nunca limpia cuando hace un desastre y piensa que yo o mi hermana vamos a limpiar su tiradero. Le dije que eso no se hace pero no me hizo caso.	I fought with my brother the other day because he once again left the bathroom very dirty. I hate that he never cleans up when he makes a mess and think that I or my sister will clean up the mess. I said that he shouldn't do this, but he didn't listen to me.	yes	P12	good	No	manual_translation	Agree	Neutral	Neutral
5ae5b7e26735bd0001d7dfe3	English	Spanish						English				Currently use it heavily	Currently use it heavily	Currently use it heavily	Used it heavily in the past but have stopped	Used it heavily in the past but have stopped	Currently use it heavily	Never Used it	Used it heavily in the past but have stopped	Used it heavily in the past but have stopped	Never Used it	Currently use it heavily	Used it occasionally in the past but have stopped	Yes	Yes	Google Translate						Spanish	es	Only MT	about a funny situation where you were distracted by your mobile phone.	Una vez me caÃ­ por un terraplÃ©n cerca de la playa mientras jugaba a Pokemon Go allÃ¡ por 2016	I once fell down an embankment near the beach while playing Pokemon Go back in 2016	yes	explaining your opinion about a political controversy.	Creo que lo peor que hizo Donald Trump fue declarar que el COVID no era nada que temer despuÃ©s de su propia batalla con la enfermedad.	I think the worst thing Donald Trump ever did was declare that COVID was nothing to fear after his own battle with the disease.	yes	P88	Good	Smooth sailing across calm seas.	MT_with_edit	Somewhat disagree	Strongly agree	Disagree
5b2834ed7da9a90001a3c5e5	Spanish							English	Spanish			Used it occasionally in the past but have stopped	Used it occasionally in the past but have stopped	Currently use it heavily	Currently use it, but occasionally	Used it heavily in the past but have stopped	Currently use it heavily	Never Used it	Used it occasionally in the past but have stopped	Used it occasionally in the past but have stopped	Never Used it	Used it occasionally in the past but have stopped	Used it occasionally in the past but have stopped	Yes	Yes	Google Translate						Spanish	es	Manual	about an unusal travel experience that you had.	"Una vez yo viaje a la Republica Dominicana con mi familia por vacaciones. Y cuando llegamos al aeropuerto, habia unos cuantos muchachos que nos estaba mirando raro. Discubri que ellos estaba mirando mi falda que estaba super arriba y yo tenia averguenza. "	"There was this one time I went to the Dominican Republic with my family for vacation. Once we got to the airport, I discovered there were a couple of guys looking in our direction. I realized that they were looking at my skirt which was all the way up and I felt embarrassed."	yes	"about a bad experience with an employer or teacher."	"Cuando yo estaba en el quinto grado, yo tenia una maestra que no me gustaba. Ella siempre me llamaba para participar en los discussiones con un voz llena de odio."	"When I was in 5th grade, there was this female teacher who did not like me. She would always call on me to participate in class discussions with her voice filled with hate."	yes	P48	Great info	No	manual_translation	Somewhat disagree	Somewhat agree	Disagree
5b457ba9eb64c200015bbab1	English	Chinese						English				Currently use it, but occasionally	Currently use it heavily	Currently use it heavily	Used it occasionally in the past but have stopped	Used it heavily in the past but have stopped	Currently use it, but occasionally	Used it occasionally in the past but have stopped	Currently use it heavily	Currently use it, but occasionally	Used it occasionally in the past but have stopped	Never Used it	Used it heavily in the past but have stopped	Yes	Yes	Google Translate						Chinese	zh-CN	Only MT	about a bad retail experience you recently had.	ä»Šå¤©åŽ»åŠ©ç†è¾±éª‚	Go to the assistant today to abuse	no	explaining your opinion about a political controversy.	æ¯ä¸ªäººéœ€è¦æ‰“ç–«è‹—	Everyone needs to be vaccinated	yes	P109	ok	no	only_MT	Agree	Strongly agree	Somewhat agree
5b6872f33ffbf200015434ef	Spanish							English	Spanish			Used it heavily in the past but have stopped	Currently use it, but occasionally	Currently use it heavily	Currently use it heavily	Used it occasionally in the past but have stopped	Currently use it, but occasionally	Never Used it	Never Used it	Used it occasionally in the past but have stopped	Currently use it, but occasionally	Currently use it heavily	Used it occasionally in the past but have stopped	Yes	Yes	Google translator						Spanish	es	Only MT	about a bad retail experience you recently had.	Tuve una muy mala experiencia con este servicio, no fui tratada de manera correcta, ninguna de mis preguntas fue resuelta y ninguno de mis problemas obtuvo una soluciÃ³n	I had a really bad experience with this service, I wasn't treated in the right way, none of my questions received an answer and none of my problems received a solution.	yes	about a heated argument you recently had with a family member.	EstÃ¡ persona en mi familia piensa que debemos aplaudirle sus errores que mayormente hieren a otros.	This person in my family thinks that we should applause her mistakes even if it hurt others.	yes	P201	Good	No	manual_translation	Disagree	Disagree	Strongly disagree
5b7b1eb9338a93000154faab	English	Spanish						English				Currently use it heavily	Currently use it, but occasionally	Currently use it, but occasionally	Never Used it	Used it occasionally in the past but have stopped	Currently use it heavily	Never Used it	Currently use it heavily	Never Used it	Used it occasionally in the past but have stopped	Never Used it	Used it occasionally in the past but have stopped	No	Yes	Google Translate						Spanish	es	MT with edit	about a bad retail experience you recently had.	Estaba en la tienda el dia de ayer y no encontraba botellas de agua. Pregunte al joven que trabajaba ayi y me dijo que estaba harto de esa pregunta. No podia creerlo.	I was at the store yesterday and couldn't find bottles of water. I asked the young man who worked there and he told me that he was fed up with that question. I could not believe it.	yes	about a bad experience with an employer or teacher.	El mes pasado mi supervisor me dijo que no me iba dejar pedir dia de vacacion hasta que el trabajo que dejo algien mas esta completo.	Last month my supervisor told me that he would not let me ask for a vacation until the job that someone else left is complete.	yes	P178	Great info	No	MT_with_edit	Disagree	Strongly agree	Disagree
5baa535fa3c9170001156197	English							English				Used it occasionally in the past but have stopped	Currently use it, but occasionally	Never Used it	Used it occasionally in the past but have stopped	Never Used it	Never Used it	Never Used it	Never Used it	Currently use it, but occasionally	Never Used it	Never Used it	Never Used it	No	Yes	Google translate						German	de	Only MT	about a bad retail experience you recently had.	Ich wollte eine Hose in einem GeschÃ¤ft kaufen, aber die Hose war nicht vorhanden, obwohl die Webseite angab, dass die Hose speziell in diesem GeschÃ¤ft ist.	I wanted to buy a pair of pants in a store but the pants were not available even though the website said the pants are specifically in that store.	yes	explaining your opinion about a political controversy.	Die Politiker beider Hauptparteien verbringen so viel Zeit damit, stÃ¤ndig miteinander zu kÃ¤mpfen um Stimmen zu gewinnen, aber dienen nicht den Menschen des Landes and machen keine Fortschritte fÃ¼r das Land.	The politicians of both main parties spend so much time constantly fighting each other to win votes, but do not serve the people of the country and make no progress for the country.	yes	P41	ok	no	only_MT	Agree	Somewhat agree	Strongly disagree
5bd45c509afb5b00015c48f4	English	Spanish						English	Spanish			Currently use it, but occasionally	Currently use it, but occasionally	Currently use it, but occasionally	Never Used it	Never Used it	Currently use it heavily	Never Used it	Currently use it, but occasionally	Used it occasionally in the past but have stopped	Currently use it, but occasionally	Never Used it	Used it occasionally in the past but have stopped	No	Yes	Google translate						Spanish	es	Only MT	about something funny that happened to you during a meeting.	Durante la Ãºltima reuniÃ³n a travÃ©s de zoom, un participante cantÃ³ una canciÃ³n, y mi perro comenzÃ³ a aullar a la mismo tiempo, porque el tambiÃ©n canta.	During the last zoom meeting, a participant sang a song, and my dog started howling at the same time, because he sings too.	yes	explaining your opinion about a political controversy.	a nuestros hijos se les debe enseÃ±ar a amar a Estados Unidos.Esto no significa que debamos enseÃ±ar que la esclavitud estaba bien, pero debemos eliminar la propaganda que dice que nuestro paÃ­s es fundamentalmente malo.	our children must be taught to love America. This does not mean that we should teach that slavery was right, but we must eliminate the propaganda that our country is fundamentally wrong.	yes	P170	Great info	no	only_MT	Somewhat agree	Somewhat agree	Somewhat disagree
5bfff7c02213be0001c2c7cf	Spanish	Spanish						English	Spanish			Used it heavily in the past but have stopped	Used it heavily in the past but have stopped	Currently use it, but occasionally	Never Used it	Used it occasionally in the past but have stopped	Currently use it heavily	Never Used it	Currently use it, but occasionally	Never Used it	Used it occasionally in the past but have stopped	Currently use it, but occasionally	Never Used it	Yes	Yes	Google Translate.						Spanish	es	Only MT	about something funny that happened to you during a meeting.	Hola! Hoy me paso algo muy chistoso en mi trabajo durante una reunion. Entre y tenia cereal en mi pelo de la noche antepasada como me quede dormida comiendo cereal.	Hello! Today something very funny happened to me at work during a meeting. I walked in and had cereal in my hair from the night before as I fell asleep eating cereal.	yes	about a bad experience with an employer or teacher.	Hola a todos! Les quiero contar de una experiencia que tuve con mi maestra en la secundaria. Ella me regano porque grite durante la clase porque todos no se callaban durante la lectura. Ella tenia estudiantes favoritos y ellos siempre gritaban durante la clase. No me gustaba eso de ella como no es justo tener estudiantes favoritos, pero era un pueblo chico y se conocian mucha gente e ella conocia…	Hello everyone! I want to tell you about an experience I had with my teacher in high school. She scolded me for yelling during class because everyone wouldn't shut up during the reading. She had favorite students and they always yelled during class. I didn't like that about her as it's not fair to have favorite students, but it was a small town and many people knew each other and she knew her par…	yes	P47	Great info	Nothing.	only_MT	Agree	Somewhat agree	Disagree
5c01d3c509e9c70001500b10	English	Chinese						English	Chinese			Never Used it	Used it occasionally in the past but have stopped	Currently use it heavily	Used it heavily in the past but have stopped	Never Used it	Currently use it, but occasionally	Currently use it heavily	Currently use it, but occasionally	Never Used it	Currently use it, but occasionally	Never Used it	Never Used it	I am not sure	Yes	google translate						Chinese	zh-CN	Manual	about a bad retail experience you recently had.	ä¸¤ä¸ªæ˜ŸæœŸå‰æˆ‘åœ¨ç½‘ä¸Šä¹°äº†åŒ…çŒ«ç²®ï¼Œæ‰“ç®—åŽ»åº—é‡Œæ‹¿ã€‚å‡ å¤©åŽç­‰æˆ‘åˆ°åº—é‡Œçš„æ—¶å€™è¢«å‘ŠçŸ¥æˆ‘çš„è®¢å•å–æ¶ˆäº†ï¼Œä»–ä»¬ä¼šæŠŠé’±é€€åˆ°æˆ‘çš„å¡é‡Œã€‚è”ç³»äº†å‡ æ¬¡å®¢æœè¯´ä¼šé€€ç»™æˆ‘ï¼Œä¸€ç›´åˆ°æ˜¨å¤©é’±éƒ½æ²¡æœ‰ã€‚æ‰“äº†å¥½å¤šæ¬¡ç”µè¯æ‰æ”¶åˆ°é€€æ¬¾ä¿¡æ¯	Two weeks ago I bought a bag of cat food and chose to pick up at the store. a few days after I placed an order, I was told that my order was canceled. They would issue a refund to my credit card. up until yesterday, I still haven't gotten my refund, and I had contacted customer services several time. I had to call them many times to get a refund confirmation.	yes	explaining your opinion about a political controversy.	æœ‰å…³éƒ¨é—¨åº”è¯¥åŠ å¤§å¯¹æžªæ”¯ç®¡æŽ§ï¼Œä¸èƒ½è½»æ˜“è®©æœ‰çŠ¯ç½ªåŽ†å²æˆ–ç²¾ç¥žæœ‰é—®é¢˜çš„äººé‚£ä¹ˆå®¹æ˜“å¾—åˆ°	There should be more strict law for gun control so that people who has criminal background or people who has mental disability cannot have access to gun easily	yes	P161	Great info	no	MT_with_edit	Agree	Neutral	Agree
5c12943f534a3a00014ea01b	English	Tagalog						English	Tagalog			Never Used it	Used it heavily in the past but have stopped	Currently use it heavily	Never Used it	Never Used it	Currently use it heavily	Never Used it	Currently use it heavily	Never Used it	Never Used it	Never Used it	Used it heavily in the past but have stopped	Yes	Yes	Google Translate						Tagalog	tl	MT with edit	about something funny that happened to you during a meeting.	Nung isang araw, yung boss ko eh nagsalita lang buong araw tungkol sa programa na tawag 30 Rock. Imbis na sabihan niya kami ng mga bagong updates sa trabaho eh nagsalita lang siya about 30 Rock.	One day, my boss just talked all day about a program called 30 Rock. Instead of telling us about new job updates, he just talked about 30 Rock.	yes	about a heated argument you recently had with a family member.	Nagtampo yung nanay ko kasi hindi raw siya inimbita sa Bingo ng mga kapatid ko. Ang sabi ko sa kanya, hindi na kailangan siyang imbitahin dahil automatic na kasama siya. Sabi ko hindi naman lagi eh dapat na merong personal invite sa kanya. Para sa mga bisita lang yon.	My mother was upset because my siblings didn't invite her to Bingo. I told her, there was no need to invite her because she was automatically included. I said it's not always that there should be a personal invite to her. It's just for guests.	yes	P62	good	No	MT_with_edit	Strongly disagree	Strongly agree	Strongly disagree
5c2c189b867f660001af5dc5	english	Spanish	Korean	Japanese	Tagalog			English	Spanish	Korean		Currently use it, but occasionally	Used it occasionally in the past but have stopped	Currently use it, but occasionally	Never Used it	Never Used it	Currently use it heavily	Never Used it	Used it occasionally in the past but have stopped	Currently use it, but occasionally	Currently use it, but occasionally	Never Used it	Currently use it heavily	Yes	Yes	google translate						Spanish	es	Manual	about a funny situation where you were distracted by your mobile phone.	distraerme en mi telÃ©fono con tonterÃ­as tontas de Twitter y chocar contra una puerta\n\n	getting distracted on my phone by dumb twitter nonsense and walking into a door	yes	about a heated argument you recently had with a family member.	me metÃ­ en un argumento sn sobre personas transgÃ©nero que compiten en deportes femeninos	got into an argument about transgender people competing in women's sports	yes	P113	great info	no	manual_translation	Neutral	Neutral	Neutral
5c3bfa59e8ff27000171a46a	English	Urdu						English	Urdu			Currently use it, but occasionally	Currently use it, but occasionally	Currently use it, but occasionally	Currently use it, but occasionally	Currently use it, but occasionally	Currently use it heavily	Used it occasionally in the past but have stopped	Currently use it heavily	Used it occasionally in the past but have stopped	Never Used it	Currently use it heavily	Never Used it	Yes	Yes	Google translate						Hindi	hi	Manual	about a funny situation where you were distracted by your mobile phone.	Mae kitaab parratha or uske baad mere phone schor bachara, kaab meane phone dekhlia, uske baad me koy parna nay karsakta	I was reading my books and suddenly my phone went off, when i went to check my phone, after that i couldn't read anymore	yes	about a heated argument you recently had with a family member.	ramadan abbee hoora, lekin mere sara ban or bhai rosa nay raktha. parso meane bott dant kiya mere ban or bhai, mene puchlia "tum kyu nay rosa raktha? koy sharrim nay ha?" sara bache kuch nay ka sach ta			P194	incomplete	nope	manual_translation	Strongly agree	Strongly disagree	Strongly agree
5c50c73cecd461000198fea1	English							English				Currently use it heavily	Used it occasionally in the past but have stopped	Currently use it, but occasionally	Used it occasionally in the past but have stopped	Currently use it heavily	Currently use it heavily	Never Used it	Currently use it heavily	Currently use it, but occasionally	Never Used it	Currently use it, but occasionally	Never Used it	Yes	Yes	Google translate						Spanish	es	Only MT	about something funny that happened to you during a meeting.	Yo quede dormir	I stayed to sleep	yes	about a bad experience with an employer or teacher.	La professora no escusha me y es muy brusca	The teacher does not listen to me and is very abrupt	no	P172	ok	Nothing!	only_MT	Agree	Neutral	Neutral
5c52f898110c55000144bf18	Portuguese							English	Portuguese			Used it occasionally in the past but have stopped	Currently use it heavily	Currently use it heavily	Currently use it heavily	Never Used it	Currently use it, but occasionally	Never Used it	Never Used it	Never Used it	Used it occasionally in the past but have stopped	Currently use it, but occasionally	Never Used it	Yes	Yes	Google translate						Portugese	pt	MT with edit	about a bad retail experience you recently had.	Ha um mes atras eu fui a uma loja comprar um sapato mas nao estava conseguindo encontrar a cor que eu queria. Eu perguntei a uma das vendedoras se havia a cor e o modelo que eu gostaria de comprar e a senhora simplesmente me ignorou dizendo que estava bastante ocupada. Logo em seguida eu procurei outro vendedor para me atender mas os funcionarios da loja continuaram a me ignorar. Eu decidi procur…	A month ago I went to a store to buy a shoe but I couldn't find the color I wanted. I asked one of the salespeople if there was the color and style I would like to buy and the lady just ignored me saying she was quite busy. Soon after I looked for another salesperson to assist me but the store employees continued to ignore me. I decided to look for another store and I was treated with great court…	yes	explaining your opinion about a political controversy.	Desde o inicio do COVID 19 eu venho observando que as pessoas estao escolhendo ou nao se proteger de acordo com suas opinioes politicas incluindo o uso de mascara e as vacinas e simplesmente estao ignorando a ciencia o que na minha opiniao e simplesmente errado	Since the beginning of COVID 19 I have been observing that people are choosing or not to protect themselves according to their political opinions including the use of masks and vaccines and are simply ignoring science which in my opinion is simply wrong	yes	P81	Great info	No nothing	MT_with_edit	Disagree	Strongly agree	Strongly disagree
5c5d0c72d697e70001079ca0	English	Spanish						English	Spanish			Currently use it, but occasionally	Currently use it, but occasionally	Currently use it, but occasionally	Currently use it, but occasionally	Never Used it	Currently use it heavily	Never Used it	Currently use it heavily	Currently use it, but occasionally	Never Used it	Never Used it	Never Used it	Yes	Yes	Google Translate						Spanish	es	MT with edit	about something funny that happened to you during a meeting.	Bueno, una vez durante una reuniÃ³n, lleguÃ© tarde y me apresurÃ©, me tropecÃ© y me caÃ­ frente a todos en la reuniÃ³n.	Well, once during a meeting, I was late and rushed, tripped, and fell in front of everyone in the meeting.	yes	about a heated argument you recently had with a family member.	A veces discutÃ­a con mi madre sobre mi novia porque mi madre no era una gran admiradora de ella. TerminÃ© mudÃ¡ndome debido a estos argumentos.	Sometimes I argued with my mother about my girlfriend because my mother was not a big fan of hers. I ended up moving due to these arguments.	yes	P200	great info	Nothing went wrong	MT_with_edit	Strongly disagree	Strongly disagree	Strongly disagree
5c6f2ab29d7a310001470418	English	Spanish						English				Used it occasionally in the past but have stopped	Currently use it heavily	Never Used it	Never Used it	Used it occasionally in the past but have stopped	Currently use it heavily	Never Used it	Used it occasionally in the past but have stopped	Used it heavily in the past but have stopped	Currently use it, but occasionally	Used it occasionally in the past but have stopped	Never Used it	I am not sure	Yes	Google Translate						Spanish	es	MT with edit	about a bad retail experience you recently had.	Cuando llege a la tienda cellular. La tienda estaba vacia. El trabajador estaba hablando en el telefono. Me saludo y dijo, un momento y te ayudo. Despues de un minuto escuchando su conversasion. Me fije que estaba en una llamada personal y no de trabajo. Espere como unos 4 minutos y todavia el senor hablando con qual quiera mientras no me attendia. Espere cinco minutos y me anoje bastante que me …	When I get to the cell store. The store was empty. The worker was talking on the phone. He greeted me and said, one moment and I'll help you. After a minute listening to their conversation. I noticed that he was on a personal call and not a work call. I waited about 4 minutes and the man was still talking to whomever he wanted while he didn't attend to me. Wait five minutes and I got so angry tha…	yes	about a bad experience with an employer or teacher.	Yo tenia un jefe una vez Que se anojo con migo porque , yo me iba dejar de el trabajo. cuando le di noticia de mis decision de retirar en dos cemanas . El jefe comento No no te retirares en dos cemanas de vas hoy. Te vas al fin de este dia. No entendi porque se anojo tanto con migo. Le dije esta bien pero me vas a pagar mis dos semanas. Aunque no le gusto la idea. si me pago por las dos cemanas.	I once had a boss who got mad at me because I was going to quit my job. when I gave him notice of my decision to withdraw in two weeks. The boss commented No, you will not retire in two weeks of going today. You leave at the end of this day. I don't understand why he got so mad at me. I told him okay but you're going to pay me for my two weeks. Though he didn't like the idea. I got paid for the t…	yes	P106	great info	none at all	MT_with_edit	Strongly disagree	Strongly agree	Strongly disagree
5c71bdec87f8cd0001b458f5	English	Spanish						English	Spanish			Currently use it heavily	Used it heavily in the past but have stopped	Currently use it, but occasionally	Currently use it, but occasionally	Currently use it, but occasionally	Used it heavily in the past but have stopped	Never Used it	Currently use it, but occasionally	Never Used it	Used it occasionally in the past but have stopped	Never Used it	Used it heavily in the past but have stopped	Yes	Yes	Google translate						Spanish	es	Manual	about something funny that happened to you during a meeting.	En una reunion, la jefa nos grito y nos dijo que Ã©ramos empleados malos. Nos dijo que estÃ¡bamos ruinando el negocio. Que antes de nosotros, ella tenia 5 estrellas en Google. Pero, la ultima cosa escrita en Google era algo negativo de ella.	In a meeting, my boss yelled at us and told us we were horrible employees. She told us we were ruining her business. That before us, she had 5 stars on Google review. But the last review on google was something negative about her.	yes	explaining your opinion about a political controversy.	Los que soportan Trump son idiotas. La gente que soportan a ese hombre y los Republicanos, especialmente los pobres, no saben que los politicos no quieren saber de ellos y no les important.	People who support Trump are idiots. The people who support that man and Republicans, especially poor people, don't understand that those politicians don't care about them.	yes	P110	great info	No	MT_with_edit	Somewhat agree	Neutral	Neutral
5c872cded9fe700001024123	English	Spanish						English				Currently use it, but occasionally	Currently use it heavily	Currently use it heavily	Currently use it heavily	Currently use it, but occasionally	Currently use it heavily	Used it heavily in the past but have stopped	Currently use it, but occasionally	Currently use it, but occasionally	Currently use it, but occasionally	Currently use it, but occasionally	Currently use it, but occasionally	Yes	No							Spanish	es	Manual	"about a bad retail experience you recently had."	"Los empleados en esta tienda son poco amables y no tienen respeto por sus clientes."	"Employees in this store are not friendly and have no respect for their clients."	yes	"explaining your opinion about a political controversy."	"No deberia ser muy dificil organizar una politica para prohibir armas en lugares publicos."	"It should not be very difficult to organize a law to prohibit weapons in public places."	yes	P80	Good info	No	MT_with_edit	Neutral	Somewhat agree	Somewhat agree
5cd08e2ff59e0a0013563602	English							English				Currently use it, but occasionally	Currently use it, but occasionally	Currently use it heavily	Never Used it	Currently use it heavily	Currently use it heavily	Never Used it	Currently use it, but occasionally	Never Used it	Currently use it heavily	Currently use it, but occasionally	Currently use it, but occasionally	Yes	Yes	Google Translate						Japanese	ja	Manual	about a bad retail experience you recently had.	å£Šã‚ŒãŸã‚‚ã®ã‚’è¿”å´ã™ã‚‹å¿…è¦ãŒã‚ã£ãŸã®ã«ã€è¿”ã—ã¦ãã‚Œãªã‹ã£ãŸæ™‚ãŒã‚ã‚Šã¾ã—ãŸã€‚å½¼ã‚‰ã¯ç§ãŒãã‚Œã‚’è‡ªåˆ†ã§å£Šã—ã¦å½¼ã‚‰ã‚’è©æ¬ºã—ã‚ˆã†ã¨ã—ã¦ã„ã‚‹ã¨ä¸»å¼µã—ã¾ã—ãŸã€‚	There was a time where I was trying to return something that was broken but they wouldn't let me. They claimed that I broke it and was trying to scam them	yes	about a bad experience with an employer or teacher.	ç§ãŒè‹¥ã„é ƒã€ã™ãã«ç­”ãˆãªã‹ã£ãŸã®ã§ã€ã‚¯ãƒ©ã‚¹ã§å…ˆç”Ÿã«æ€’é³´ã‚‰ã‚Œã¾ã—ãŸã€‚æ¥ãšã‹ã—ã‹ã£ãŸã§ã™	\nWhen I was young, I didn't answer immediately, so my teacher yelled at me in class. It was embarrassing	yes	P122	Great info	No	MT_with_edit	Neutral	Strongly disagree	Strongly disagree
5cf8a7e64af157001564498a	Mandarin	Mandarin						English	Mandarin			Used it occasionally in the past but have stopped	Used it heavily in the past but have stopped	Currently use it heavily	Currently use it, but occasionally	Never Used it	Currently use it heavily	Used it occasionally in the past but have stopped	Currently use it, but occasionally	Currently use it, but occasionally	Used it occasionally in the past but have stopped	Used it occasionally in the past but have stopped	Used it occasionally in the past but have stopped	Yes	Yes	Google translate						Chinese	zh-TW	MT with edit	about an unusal travel experience that you had.	æˆ‘æœ‰ä¸€æ¬¡åŽ»ç§˜é­¯åƒäº†è‰æ³¥é¦¬çš„æ–™ç†æ—¢ç„¶æ„æ–™å¤–çš„å¥½åƒï¼	I once went to Peruã„‡ since it was unexpectedly delicious!	yes	about a bad experience with an employer or teacher.	æˆ‘ä»¥å‰åœ¨ç´ç´„æœ‰ä¸€å€‹éƒ½ä¸åšäº‹çš„ä¸Šå¸	I used to have a boss in New York who didn't do any o	yes	P133	ok	none	MT_with_edit	Strongly disagree	Neutral	Strongly disagree
5cfa6dcc3066e60001d77aa8	English	Korean	French					English	Korean	French		Currently use it, but occasionally	Used it occasionally in the past but have stopped	Currently use it heavily	Never Used it	Currently use it, but occasionally	Currently use it heavily	Never Used it	Currently use it, but occasionally	Never Used it	Currently use it, but occasionally	Currently use it, but occasionally	Used it heavily in the past but have stopped	Yes	Yes	Google Translate						French	fr	Manual	about something funny that happened to you during a meeting.	Le chien de mon prof a fait caca sur le tapis	My professor's dog pooped on the carpet	yes	about a heated argument you recently had with a family member.	Ma mÃ¨re Ã©tait en colÃ¨re contre moi parce que j'ai achetÃ© tellement de vÃªtements...	My mother was mad at me because I bought so many clothes.	yes	P189	Good	Nothing went wrong!	manual_translation	Strongly disagree	Neutral	Somewhat disagree
5d1ba5653788ac0019ced548	English	Spanish						English	Spanish			Currently use it, but occasionally	Currently use it heavily	Currently use it heavily	Currently use it, but occasionally	Used it heavily in the past but have stopped	Currently use it, but occasionally	Never Used it	Currently use it heavily	Currently use it heavily	Used it heavily in the past but have stopped	Never Used it	Never Used it	Yes	Yes	Google						Spanish	es	MT with edit	about an unusal travel experience that you had.	Nos fuimos a Orlando. No nos gusto el servicio en el avion. Gracias a dios ya estamos en casa.	We went to Orlando. We did not like the service on the plane. Thank God we are already home.	yes	explaining your opinion about a political controversy.	A mi no me gusta el presidents Trump. Es una persona muy nala.	I don't like President Trump. He is a very bad person.	yes	P18	Ok	No	MT_with_edit	Strongly disagree	Strongly agree	Strongly disagree
5d1e5ece2e9ac30016b522c5	English	Spanish						English	Spanish			Currently use it, but occasionally	Currently use it heavily	Currently use it heavily	Currently use it, but occasionally	Currently use it heavily	Currently use it heavily	Currently use it, but occasionally	Used it heavily in the past but have stopped	Currently use it heavily	Currently use it heavily	Currently use it heavily	Used it occasionally in the past but have stopped	Yes	Yes	Google translate						Spanish	es	Manual	"about a bad retail experience you recently had."	"Tuve problemas con el proveedor de servicio al cliente. No querÃ­an devolverme el dinero del producto que habÃ­a comprado. Tuve que llamar al gerente."	"I had trouble with the customer service provider. They didn't want to refund my money for the product I had purchased. I had to call the manager."	yes	"explaining your opinion about a political controversy."	"No creo que las vacunas deban ser obligatorias. DeberÃ­a ser elecciÃ³n de todos obtener o no uno."	"I don't think vaccines should be mandated. It should be everyone's choice whether or not to get one."	yes	P21	Good info	no	manual_translation	Somewhat agree	Somewhat disagree	Neutral
5d1f71def861790016fafb83	English	Spanish	Sign language					English	Spanish			Currently use it heavily	Currently use it heavily	Currently use it, but occasionally	Currently use it, but occasionally	Never Used it	Currently use it heavily	Never Used it	Currently use it heavily	Currently use it heavily	Currently use it heavily	Never Used it	Currently use it, but occasionally	Yes	Yes	Google Translate	Microsoft Translator	iTranslate Voice				Spanish	es	MT with edit	about an unusal travel experience that you had.	El pasado semana veo chica bonita con dos sombreros.	Last week I see pretty girl with two hats.	yes	about a bad experience with an employer or teacher.	El empleado del banco fue tan grosero conmigo el otro dÃ­a que hablÃ© con el supervisor.	The bank clerk was so rude to me the other day that I talked to the supervisor.	yes	P129	Good info	The translation tool in the experiment worked great.	MT_with_edit	Strongly disagree	Strongly agree	Strongly disagree
5d377c902c4f810001ebc27a	English	farsi						English				Currently use it heavily	Currently use it, but occasionally	Currently use it heavily	Never Used it	Currently use it, but occasionally	Currently use it heavily	Never Used it	Used it occasionally in the past but have stopped	Used it occasionally in the past but have stopped	Never Used it	Currently use it heavily	Never Used it	I am not sure	Yes	google translate						French	fr	MT with edit	about a bad retail experience you recently had.	j'alle a la boutique et le travailleur etait mechant	i went to the shop and the worker was mean	yes	about a bad experience with an employer or teacher.	ma professeur m'a fait du mal	my teacher hurt me	yes	P68	good	No nothing went wrong	MT_with_edit	Strongly disagree	Somewhat agree	Strongly disagree
5d404bc74db54a0001fecb92	English	Spanish	Arabic					English	Spanish	Arabic		Used it occasionally in the past but have stopped	Used it occasionally in the past but have stopped	Currently use it, but occasionally	Currently use it, but occasionally	Currently use it, but occasionally	Currently use it heavily	Never Used it	Currently use it, but occasionally	Used it occasionally in the past but have stopped	Currently use it, but occasionally	Used it occasionally in the past but have stopped	Never Used it	I am not sure	Yes	google translate						Spanish	es	MT with edit	about an unusal travel experience that you had.	me fui de vacaciones raras. el hotel tenÃ­a una serpiente como mascota.	I went on a weird vacation. the hotel had a pet snake.	yes	about a heated argument you recently had with a family member.	mi hermana me llamÃ³ tonto y empezamos a discutir.	my sister called me a fool and we started arguing.	yes	P202	ok	None	MT_with_edit	Strongly disagree	Strongly agree	Strongly disagree
5d82d28977546f00166ae702	English	Mandarin						English				Currently use it heavily	Used it occasionally in the past but have stopped	Never Used it	Currently use it heavily	Never Used it	Currently use it heavily	Never Used it	Never Used it	Never Used it	Never Used it	Never Used it	Never Used it	Yes	Yes	Google Translate						Chinese	zh-CN	MT with edit	about a funny situation where you were distracted by your mobile phone.	æˆ‘è·Ÿå¦ˆå¦ˆåœ¨è‘¡è„å›½æ—…æ¸¸ï¼Œæˆ‘åŽ»ä¸ŠåŽ•æ‰€ï¼Œå¸¦æ‰‹æœºè¿›åŽ»ã€‚å‡ºæ¥çš„æ—¶å€™ï¼Œæˆ‘ä»¬èµ¶ç€ç™»æœºï¼Œæˆ‘çªç„¶æ‰¾æ‰‹æœºæ‰¾ä¸åˆ°ï¼æˆ‘åŒ†åŒ†å¿™å¿™åœ°è·‘å›žåŽ•æ‰€ï¼Œç­‰åˆ«äººå‡ºåŽ»ï¼Œæ‹¿æ‰‹æœºã€‚å·®ä¸€ç‚¹æ²¡èµ¶ä¸Šé£žæœºï¼Œä¸ºäº†çœ‹æ‰‹æœºï¼	I was traveling with my mother in Portugal. I went to the bathroom and brought my phone in. When we came out, we were rushing to board the plane, and I suddenly couldn't find my phone! I hurried back to the bathroom and waited for someone to go out so I could grab my phone. I almost missed the plane to look at my phone!	yes	about a bad experience with an employer or teacher.	æˆ‘åœ¨å°å­¦çš„æ—¶å€™ï¼Œé‚£æ—¶å€™ä¸ƒå²ï¼Œå¾ˆå¤©çœŸï¼Œä¸çŸ¥é“æœ‰ä¸€äº›ä¸å¥½å¬çš„å­—å­¦ç”Ÿä¸å‡†è¯´ã€‚æˆ‘åœ¨æ•™å®¤é‡Œæ’žåˆ°æˆ‘è‡ªå·±ï¼Œè¯´äº†ä¸€ä¸‹ä¸€ä¸ªè‹±æ–‡çš„ä¸åº”è¯¥è¯´çš„å­—ï¼Œè¢«è€å¸ˆéª‚äº†ã€‚æˆ‘ä¸çŸ¥é“é‚£ä¸ªå­—çš„æ„æ€ã€‚ã€‚ã€‚çŽ°åœ¨æ‡‚äº†ï¼	When I was in elementary school, when I was seven years old, I was very naive. I didn't know that there were some unpleasant words that students were not allowed to say. I hit myself in the classroom and said a word in English that should not have been said, and was scolded by the teacher. I don't know what that word means. . . Got it now!	yes	P78	Great info	No	MT_with_edit	Disagree	Strongly agree	Disagree
5d96b4f6d0e628001893a1af	English	Spanish	Patwa					patwa,				Currently use it, but occasionally	Used it heavily in the past but have stopped	Used it heavily in the past but have stopped	Used it occasionally in the past but have stopped	Used it occasionally in the past but have stopped	Currently use it heavily	Never Used it	Currently use it, but occasionally	Never Used it	Currently use it, but occasionally	Currently use it heavily	Used it heavily in the past but have stopped	Yes	Yes	google translate						Spanish	es	MT with edit	about something funny that happened to you during a meeting.	una vez durante una reuniÃ³n me rompÃ­ los pantalones.\nera ruidoso, por lo que llamÃ³ la atenciÃ³n de todos en la sala. Estaba tan avergonzado por esto.	once during a meeting I ripped my pants.\nit was loud, so it caught the attention of everyone in the room. I was so ashamed by this.	yes	explaining your opinion about a political controversy.	Donald Trump es un monstruo polÃ­tico absoluto. este hombre no tenÃ­a derecho a entrar en el mundo polÃ­tico. Estoy avergonzado de ser estadounidense durante su tiempo en el cargo y espero que nunca vuelva a suceder.	Donald Trump is an absolute political monster. this man had no right to enter the political world. I am ashamed to be an American during his time in office and I hope it never happens again.	yes	P79	Great info	N/A	MT_with_edit	Agree	Agree	Agree
5dac4dad5e53cc001499f1f6	English							English				Currently use it, but occasionally	Currently use it heavily	Currently use it, but occasionally	Used it occasionally in the past but have stopped	Currently use it, but occasionally	Currently use it heavily	Never Used it	Currently use it heavily	Currently use it, but occasionally	Currently use it, but occasionally	Never Used it	Currently use it, but occasionally	Yes	Yes	Google						Spanish	es	Manual	about an unusal travel experience that you had.	Fui a MÃ©xico por primera vez hoy. El piloto era raro y no dejaba de hablar.	I visited mexico for the first time. The pilot was weird and wouldn't stop talking.	yes	about a heated argument you recently had with a family member.	Me peleÃ© con mi hermana hoy. Ella no dejaba de gritarme y se fue enojada.	Got into a fight with my sister. She wouldn't stop yelling and then left.	yes	P220	good	no	manual_translation	Somewhat agree	Somewhat disagree	Neutral
5dd4767b32288646716dc98a	English	Ukrainian	Hungarian					English				Used it occasionally in the past but have stopped	Currently use it heavily	Used it occasionally in the past but have stopped	Currently use it, but occasionally	Never Used it	Currently use it heavily	Never Used it	Never Used it	Used it occasionally in the past but have stopped	Used it occasionally in the past but have stopped	Never Used it	Never Used it	Yes	I am not sure							Spanish	es	Manual	about an unusal travel experience that you had	"Yo requerdo una tiempo que you visitar okra paiz. Esta paiz yo no sabe ablar de la langua."	"I remember a time I went to another country. This country I had no idea how to speak their language."	yes	"about a bad experience with an employer or teacher."	"Mi Hefa ablar mal e yo no quero travahar no mas con das."	"My boss spoke poorly to me so I did not want to work with him."	yes	P28, manual, may write less	Ok	No	manual_translation	Disagree	Agree	Disagree
5dd4c20186c8864a376f7480	English	Spanish						English	Spanish			Never Used it	Currently use it, but occasionally	Used it heavily in the past but have stopped	Currently use it, but occasionally	Never Used it	Currently use it heavily	Never Used it	Used it occasionally in the past but have stopped	Used it heavily in the past but have stopped	Used it occasionally in the past but have stopped	Never Used it	Never Used it	Yes	Yes	Google Translate						Spanish	es	Manual	"about a bad retail experience you recently had."	"Una vez un cliente moreno me insulto solo porque no le entendie lo que me queria decir."	"One time a brown customer insulted me because I did not understand what he wanted to say."	yes	"explaining your opinion about a political controversy."	"Creo que hay mucho noticias falsas ahorra en dias."	"I think there is a lot of fake news nowadays."	yes	P66	ok	None	MT_with_edit	Somewhat disagree	Neutral	Disagree
5dda0d3a9255ed9824b66c7b	English	Spanish						English	Spanish			Currently use it heavily	Currently use it, but occasionally	Currently use it heavily	Currently use it heavily	Used it occasionally in the past but have stopped	Currently use it heavily	Never Used it	Currently use it heavily	Currently use it, but occasionally	Currently use it, but occasionally	Currently use it, but occasionally	Used it occasionally in the past but have stopped	I am not sure	Yes	Google Translate						Spanish	es	Only MT	about an unusal travel experience that you had.	El fin de semana pasado disfrutamos mucho de visitar los bonitos lagos en Mammoth Lakes. Que bonitos estaban, algunos fueron un poco dificil de alcancar, pero valio la pena todo el esfuerzo que hicimos en encontrar y caminar hasta encontrarlos, que belleza!	Last weekend we really enjoyed visiting the beautiful lakes at Mammoth Lakes. How beautiful they were, some were a bit difficult to reach, but it was worth all the effort we made to find and walk to find them, what a beauty!	yes	about a heated argument you recently had with a family member.	Que frustrante, todas las noches le pido a mi hijo que por favor saque la basura antes de irse a acostar. La majoria de las veces a el se le olvida, Ya me canse de tener siempre el mismo argumento con el, y no se que mas pudo hacer	How frustrating, every night I ask my son to please take out the trash before he goes to bed. Most of the time he forgets, I'm tired of always having the same argument with him, and I don't know what else he could do	yes	P23	Good info	everything worked very well	MT_with_edit	Somewhat disagree	Somewhat agree	Disagree
5de55783e520274db68ca01c	English	Hebrew						English	Hebrew	Spanish		Currently use it, but occasionally	Used it occasionally in the past but have stopped	Currently use it, but occasionally	Currently use it heavily	Never Used it	Currently use it heavily	Never Used it	Currently use it heavily	Used it occasionally in the past but have stopped	Never Used it	Never Used it	Never Used it	Yes	Yes	Google Translate						Spanish	es	MT with edit	about a funny situation where you were distracted by your mobile phone.	Hace unas semanas tuve que comprar un telefono nuevo porque mi anterior se rompiÃ³. DescarguÃ© todos los apps que uso, pero los ajustes no se quedaban igual. Antes tenia la mayoria de las notificaciones apagadas, y ahora suenan casi todas. Algunas notificaciones tienen unos sonidos muy distintivos. Hay uno que suena como alguien tocando a la puerta. Ayer esta notifacacion se sonÃ³ en medio de la …	A few weeks ago I had to buy a new phone because my old one broke. I downloaded all the apps I use, but the settings did not stay the same. Before I had most of the notifications turned off, and now almost all of them sound. Some notifications have very distinctive sounds. There is one that sounds like someone knocking on the door. Yesterday this notification went off in the middle of the night a…	yes	about a bad experience with an employer or teacher.	Hoy tuve un incidente muy desagradable en el trabajo. Mi jefe me pidiÃ³ que instalara una computadora para otro empleado. Cuando conectÃ© la pantalla con la pared, la pantalla empezÃ³ a echar humo! Le enchufÃ© con el cable equivocado. Cuando mi jefe se dio cuenta estaba muy enojado conmigo.	Today I had a very unpleasant incident at work. My boss asked me to install a computer for another employee. When I connected the screen with the wall, the screen started to smoke! I plugged it in with the wrong cable. When my boss found out he was very angry with me.	yes	P185	Great info	I did not notice anything wrong	MT_with_edit	Somewhat disagree	Agree	Disagree
5de579912238364fcdf1a97d	English	Spanish						English	Spanish			Never Used it	Never Used it	Currently use it heavily	Currently use it, but occasionally	Currently use it heavily	Currently use it heavily	Never Used it	Currently use it heavily	Currently use it, but occasionally	Currently use it, but occasionally	Never Used it	Used it occasionally in the past but have stopped	Yes	Yes	Facebook						Spanish	es	MT with edit	about a funny situation where you were distracted by your mobile phone.	Una vez estuve viendo mi telefono y por estar viendo mi telefono, choque con un poste.	Once I was looking at my phone and because I was looking at my phone, I hit a pole.	yes	about a heated argument you recently had with a family member.	Ayer estuve peleando con mi mama porque yo quiero mas independencia aunque yo vivo con mis papas todavia. Tengo 25 anos, pero yo no quiero que mi mama esta preguntando donde estoy todas las veces.	Yesterday I was fighting with my mom because I want more independence even though I still live with my parents. I'm 25 years old, but I don't want my mom asking where I am every time.	yes	P211	good info	Nothing went wrong.	MT_with_edit	Disagree	Agree	Agree
5df15bc3361a8506b94f79ed	English	portuguese						English				Never Used it	Used it heavily in the past but have stopped	Currently use it heavily	Used it occasionally in the past but have stopped	Used it occasionally in the past but have stopped	Currently use it, but occasionally	Never Used it	Used it heavily in the past but have stopped	Never Used it	Never Used it	Never Used it	Never Used it	Yes	Yes	google translate						German	de	MT with edit	about something funny that happened to you during a meeting.	Ich denke, dass ich dieses Wochenende ausgegangen bin und eine tolle Zeit hatte!	I think I went out this weekend and had a great time!	yes	about a heated argument you recently had with a family member.	Wir haben uns um die Kebabs gestritten	We fought about the kebabs	no	P114	ok	n/a	MT_with_edit	Somewhat agree	Agree	Somewhat disagree
5df967d2f6191f6e87b236e6	English	Chinese						English	Chinese			Currently use it, but occasionally	Currently use it, but occasionally	Currently use it heavily	Used it occasionally in the past but have stopped	Never Used it	Currently use it heavily	Currently use it heavily	Currently use it heavily	Currently use it, but occasionally	Used it occasionally in the past but have stopped	Used it occasionally in the past but have stopped	Used it occasionally in the past but have stopped	Yes	Yes	Google Translate						Mandarin		Manual	about a bad retail experience you recently had.	"æˆ‘ä»Šå¤©åŽ»äº†è¶…å¸‚ä¹°èœï¼Œ å›žå®¶çš„è·¯ä¸ŠåŽ»äº†ä¸€è¶Ÿæ²™æ»©æ‹ç…§ã€‚"	"I went grocery shopping today, and I took some photos at the beach on my way back."	yes	"about a bad experience with an employer or teacher."	"æˆ‘é«˜ä¸­çš„è€å¸ˆæ›¾ç»å› ä¸ºæˆ‘æ˜¯ä¸­å›½ç§»æ°‘è€Œè§‰å¾—æˆ‘ä¸ä¼šè‹±æ–‡ã€‚çœŸçš„å¾ˆæ­§è§†äººã€‚"	"My high school teacher thought that I didn't understand English just because I was a Chinese immigrant, it was kind of racist."	yes	P2	may not understand less sensitive prompt or just not a good response	None	manual_translation	Neutral	Neutral	Disagree
5e27727328b7b698b037ee6c	English	Spanish						English	Spanish			Currently use it heavily	Currently use it heavily	Currently use it, but occasionally	Currently use it, but occasionally	Currently use it heavily	Currently use it heavily	Never Used it	Currently use it heavily	Used it occasionally in the past but have stopped	Never Used it	Currently use it, but occasionally	Never Used it	Yes	Yes	Google Translate						Spanish	es	MT with edit	about something funny that happened to you during a meeting.	Tuvimos la ventana abierta durante el dÃ­a y entrÃ³ volando una abeja y todos tenÃ­an miedo de que los picaran.	We had the window open during the day and a bee flew in and everyone was afraid of being stung.	yes	about a bad experience with an employer or teacher.	Durante mi primer aÃ±o de secundaria, mi maestra de Ã¡lgebra por alguna razÃ³n realmente no me querÃ­a y tuve un mal aÃ±o ese aÃ±o en su clase porque siempre estaba de mal humor conmigo.	During my freshman year of high school, my algebra teacher for some reason didn't really like me and I had a bad year that year in her class because she was always in a bad mood with me.	yes	P51	good	no, nothing went wrong at all.	MT_with_edit	Somewhat agree	Somewhat disagree	Disagree
5e3b9b820014e23ad71813c8	English	Spanish	Sign language					English	Spanish	sign language		Currently use it heavily	Currently use it, but occasionally	Currently use it heavily	Never Used it	Currently use it, but occasionally	Currently use it, but occasionally	Never Used it	Never Used it	Currently use it, but occasionally	Never Used it	Used it heavily in the past but have stopped	Used it heavily in the past but have stopped	Yes	Yes	google translate						Spanish	es	ONly MT	about a funny situation where you were distracted by your mobile phone.	Yo recuerdo que habia un dia cuando mi telefono me dio muchas problemas. Yo queria caminar pero tambien queria usar mi telefono. Yo estaba usando mi telefono-- specificalmente usando Instagram-- durante mi camino, y entonces, yo tenia un acidente con una persona lo que yo no sabia. Me sentia muy extrana. Yo dije 'lo siento', y yo trataba continuar mi camino.	I remember there was a day when my phone gave me a lot of problems. I wanted to walk but I also wanted to use my phone. I was using my phone-- specifically using Instagram-- on the way, and then, I had an accident with a person that I didn't know about. I felt very strange. I said 'sorry', and I tried to continue on my way.	yes	explaining your opinion about a political controversy.	Hay muchos opiniones sobre el conflicto de Israel y Palestine. Soy Jewish, y por eso hay una historia rica sobre Israel y gente judea. Mi familia creen que este lugar se llama "Israel", y es la propriedad de la gente judea. Pero, hay una historia terible sobre la gente de Palestine. Tengo sentimientos encontrados...	There are many opinions about the conflict between Israel and Palestine. I am Jewish, and so there is a rich history about Israel and Jewish people. My family believes that this place is called "Israel", and it is the property of the Judean people. But, there is a terrible story about the people of Palestine. I have mixed feelings...	yes	P134	Great info	no	only_MT	Somewhat agree	Somewhat agree	Somewhat disagree
5e412b282596b0354e2a42e2	English	Spanish						English	Spanish			Currently use it heavily	Currently use it heavily	Currently use it heavily	Used it heavily in the past but have stopped	Currently use it heavily	Currently use it heavily	Used it occasionally in the past but have stopped	Currently use it heavily	Currently use it, but occasionally	Currently use it heavily	Currently use it heavily	Used it heavily in the past but have stopped	Yes	Yes	Google Translate						Spanish	es	MT with edit	about a funny situation where you were distracted by your mobile phone.	Pensando en la vez que me golpeÃ© la cabeza con la puerta del microondas porque estaba mirando mi telÃ©fono.	Thinking about the time I hit my head on the microwave door because I was looking at my phone.	yes	explaining your opinion about a political controversy.	Honestamente, ambos partidos en este paÃ­s son horribles y necesitamos deshacernos del sistema bipartidista, pero todos ustedes no estÃ¡n listos para conversaciÃ³n.	Honestly, both parties in this country are horrible and we need to get rid of the two party system, but y'all ain't ready for that conversation.	yes	P58	good	No	MT_with_edit	Disagree	Agree	Disagree
5e44bd856a16d33491308807	English	portuguese						English	portuguese			Never Used it	Currently use it, but occasionally	Currently use it heavily	Used it occasionally in the past but have stopped	Currently use it heavily	Currently use it heavily	Never Used it	Currently use it, but occasionally	Never Used it	Never Used it	Used it heavily in the past but have stopped	Used it heavily in the past but have stopped	Yes	Yes	Google Translate	DeepL					Portugese	pt	Only MT	about an unusal travel experience that you had.	Meu deus gente eu acabei de ter a pior experiencia da minha vida num hotel em Nova Iorque... nunca volto lÃ¡! Eles tinham perdido o licenciamento de Ã¡lcool e de comida e todos os quartos estavam caindo aos pedaÃ§os.	Oh my god people I just had the worst experience of my life in a hotel in New York... I will never go back there! They had lost their alcohol and food licenses and all the rooms were falling apart.	yes	explaining your opinion about a political controversy.	NÃ£o sei nÃ£o sobre esse negocio do Bolsonaro... parece bem suspeito que ele desapareceu assim mas continua insistindo que nÃ£o tem COVID...	I don't know about this Bolsonaro thing... it seems very suspicious that he disappeared like this but he keeps insisting that he doesn't have COVID...	yes	P204	ok	no	only_MT	Agree	Somewhat agree	Somewhat agree
5e56a66121583601d3c3526a	English	Gujarati						English	Gujarati			Currently use it, but occasionally	Currently use it heavily	Currently use it heavily	Currently use it heavily	Currently use it, but occasionally	Currently use it, but occasionally	Never Used it	Currently use it, but occasionally	Currently use it, but occasionally	Currently use it heavily	Currently use it, but occasionally	Never Used it	No	Yes	Google translate						French	fr	MT with edit	about an unusal travel experience that you had.	Lorsque je suis rÃ©cemment allÃ© Ã New York en dÃ©cembre dernier, ce fut une expÃ©rience de voyage assez inhabituelle. New York est gÃ©nÃ©ralement si vivante et vibrante, mais quand j'y suis allÃ©e, tout semblait calme et vide. C'Ã©tait presque comme si la ville Ã©tait complÃ¨tement endormie, ou comme si tout le monde dans la ville avait disparu. C'Ã©tait trÃ¨s Ã©trange et trÃ¨s inhabituel pour m…	When I recently went to New York last December, it was quite an unusual travel experience. New York is usually so lively and vibrant, but when I went there, everything seemed calm and empty. It was almost as if the town was completely asleep, or as if everyone in the town had disappeared. It was very strange and very unusual for me.	yes	about a bad experience with an employer or teacher.	Juste avant le dÃ©but de la pandÃ©mie, je travaillais pour une petite start-up. Ce fut la pire expÃ©rience professionnelle de ma vie. Mon employeur Ã©tait si insensible. Il Ã©tait Ã©galement trÃ¨s impoli - il parlait d'autres employÃ©s chaque fois qu'il Ã©tait dans les parages. Il ne payait pas non plus les gens Ã temps et renvoyait constamment des gens sans raison. Travailler pour lui Ã©tait trÃ…	Just before the pandemic started, I was working for a small start-up. It was the worst professional experience of my life. My employer was so insensitive. He was also very rude - he talked about other employees whenever he was around. He also didn't pay people on time and constantly fired people for no reason. Working for him was very stressful. I was very happy to leave this job and find somethi…	yes	P115	Great info	No	MT_with_edit	Disagree	Agree	Strongly disagree
5e5bf32829348a3cb01ffaa1	Hindi	Punjabi						English	Punjabi			Currently use it, but occasionally	Currently use it, but occasionally	Used it heavily in the past but have stopped	Currently use it heavily	Never Used it	Currently use it, but occasionally	Never Used it	Currently use it, but occasionally	Currently use it, but occasionally	Currently use it, but occasionally	Never Used it	Currently use it heavily	Yes	Yes	Google Translate						Russian	ur	MT with edit	about an unusal travel experience that you had.	Ø§ÛŒÚ© Ø¯ÙØ¹Û Ù…ÛŒÚº ÛŒÙˆØ±Ù¾ Ø³Û’ Ø³ÙØ± Ú©Ø±Ø±ÛÛŒ ØªÚ¾ÛŒ Ø§ÙˆØ± Ø¬ÛŒØ³Û’ ÛÛŒ Ù…ÛŒÚº Ø¬ÛØ§Ø² Ù¾Ø± Ú†Ú‘Ú¾ÛŒ ØªÙˆ Ø§ÛŒÚ© Ø³Ù¹ÛŒÙˆØ±Úˆ Ù†Û’ Ù…ÛŒØ±ÛŒ Ø·Ø±Ù Ø¯ÛŒÚ©Ú¾ Ú©Ø± Ø¢Ù†Ú©Ú¾ Ù…Ø§Ø±ÛŒÛ” Ø§ÙˆØ± ÛŒÛ Ø¯Ùˆ Ø¨Ø§Ø± ÛÙˆØ§Ø¬Ø¨ Ø¬ÛØ§Ø² Ø³Û’ Ø§ØªØ±Ù†Û’ Ù„Ú¯ÛŒ ØªØ¨ Ù¾Ú¾Ø± Ø³Û’! Ù…Ø¬Ú¾Û’ ÛÙ†Ø³ÛŒ Ø¢Ø¦ÛŒ Ú©ÛŒÙˆÙ†Ú©Û ÙˆÛ Ø§ÛŒÚ© Ø¨Ú‘ÛŒ Ø¹Ù…Ø± Ú©Û’ Ø´Ø±ÛŒÙ Ø¢Ø¯Ù…ÛŒ ØªÚ¾Û’ Û”	Once I was traveling from Europe and as soon as I got on the plane a steward looked at me and winked. And it happened twice when I started getting off the plane again! I laughed because he was an older gentleman.	yes	about a bad experience with an employer or teacher.	ÛŒÚ© Ø¨Ø§Ø± Ù…ÛŒØ±ÛŒ Ù¹ÛŒÚ†Ø± Ù†Û’ Ù…Ø¬Ú¾Û’ Ø¨Ø±Ø§ Ú¯Ø±ÛŒÚˆ Ø¯ÛŒØ§ Ú©ÛŒÙˆÙ†Ú©Û Ø§Ù† Ú©Û’ Ù…Ø·Ø§Ø¨Ù‚ Ù…ÛŒÚº Ø³Ù†Ø¬ÛŒØ¯Û Ø·Ø§Ù„Ø¨ Ø¹Ù„Ù… Ù†ÛÛŒÚº ØªÚ¾ÛŒÛ” Ø§Ø³Ø§ØªØ°Û Ú©Ùˆ ÛŒÛ ÙØ±Ø¶ Ø¨Ù†ØªØ§ Ú©Û ÙˆÛ Ø·Ø§Ù„Ø¨ Ø¹Ù„Ù… Ú©Ùˆ Ø¬Ø§Ù†Ú†Û’ Ú©Û ÙˆÛ Ø³Ù†Ø¬ÛŒØ¯Û ÛÛ’ ÛŒØ§ Ù†ÛÛŒÚºÛ”	Once my teacher gave me a bad grade because according to him I was not a serious student. It is the teacher's responsibility to test the student to see if he is serious.	yes	P175	Great info	It was a little difficult writing in another language as I had to download the extension for it. But it was fun. Also I was only able to list 2/3 languages. The 3rd language is the one I picked to write in : Urdu	MT_with_edit	Neutral	Neutral	Somewhat disagree
5e67f0321e4f0a0a657c1d08	English	Hindi						English	Hindi			Currently use it, but occasionally	Currently use it, but occasionally	Currently use it, but occasionally	Currently use it heavily	Currently use it, but occasionally	Currently use it heavily	Never Used it	Currently use it heavily	Currently use it, but occasionally	Used it heavily in the past but have stopped	Used it occasionally in the past but have stopped	Used it occasionally in the past but have stopped	Yes	Yes	Google Translate	Bing translate					Hindi	hi	Manual	about a bad retail experience you recently had.	à¤®à¥ˆà¤‚ à¤¹à¤¾à¤² à¤¹à¥€ à¤®à¥‡à¤‚ à¤¬à¥‡à¤¸à¥à¤Ÿ à¤¬à¤¯ à¤—à¤¯à¤¾ à¤¥à¤¾. à¤µà¤¹à¤¾à¤‚ à¤ªà¤° à¤®à¥ˆà¤‚à¤¨à¥‡ à¤à¤• à¤¹à¥‡à¤¡à¤«à¥‹à¤¨à¥à¤¸ à¥™à¤°à¥€à¤¦à¥‡ à¤¥à¥‡. à¤œà¤¬ à¤˜à¤° à¤œà¤¾à¤•à¥‡ à¤¦à¥‡à¤–à¤¾ à¤¤à¥‹ à¤ªà¤¤à¤¾ à¤šà¤²à¤¾ à¤•à¥€ à¤‰à¤¨à¤®à¥‡ à¤¸à¥‡ à¤†à¤µà¤¾à¥› à¤¨à¤¹à¥€à¤‚ à¤† à¤°à¤¹à¥€. à¤œà¤¬ à¤µà¤¾à¤ªà¤¸ à¤²à¥Œà¤Ÿà¤¨à¥‡ à¤—à¤¯à¤¾ à¤¤à¥‹ à¤‰à¤¨à¥à¤¹à¥‹à¤‚à¤¨à¥‡ à¤¬à¥‹à¤¹à¥‹à¤¤ …	I recently went to best buy. There I bought a pair of headphones. But when I tried them at home, I found that there was no sound coming from them. But when I tried to return them, they really harassed me throughout the process. First there was a really long line for returns. Since I didn't have the receipt, I urged them to check their computer but for some reason that didn't work. The computer di…	yes	about a bad experience with an employer or teacher.	à¤¬à¤¾à¤¤ à¤¤à¤¬ à¤•à¥€ à¤¹à¥ˆ à¤œà¤¬ à¤®à¥ˆà¤‚ à¤•à¥‰à¤²à¥‡à¤œ à¤®à¥‡à¤‚ à¤ªà¤¢à¤¤à¤¾ à¤¥à¤¾. à¤µà¤¹à¤¾à¤‚ à¤ªà¤° à¤®à¥‡à¤°à¥‡ à¤ªà¥à¤°à¥‹à¤«à¥‡à¤¸à¤° à¤¨à¥‡ à¤®à¥à¤à¥‡ à¤à¤• à¤ªà¥à¤°à¥‹à¤œà¥‡à¤•à¥à¤Ÿ à¤ªà¥‡ à¤…à¤ªà¥à¤ªà¥‹à¤‡à¤‚à¤Ÿ à¤•à¤¿à¤¯à¤¾ à¤¥à¤¾ à¤à¤‚à¤¡ à¤‰à¤¸à¤•à¥‹ à¤ªà¥‚à¤°à¤¾ à¤•à¤°à¤¨à¥‡ à¤•à¥€ à¤¡à¥‡à¤Ÿ à¤­à¥€ à¤¦à¥€. à¤¡à¥‡à¤¡à¤²à¤¾à¤‡à¤¨ à¤¸à¥‡ à¤à¤• à¤¦à¤¿à¤¨ à¤ªà¤¹à¤²à¥‡…	This incident from from those days when I was in college. My professor had given me a project and set a deadline for completion. Just a day before the deadline, my laptop crashed. I tried my best but nothing seemed to work. I took it to a technician but he said that it would take atleast 3-4 days to repair. i said yes and left the laptop with him. The first thing I did was call my professor when …	yes	P205	great info	nothing went wrong	manual_translation	Disagree	Disagree	Agree
5e76d33b72b482247aadc779	English	Spanish						English	Spanish			Used it occasionally in the past but have stopped	Currently use it heavily	Currently use it, but occasionally	Currently use it, but occasionally	Used it occasionally in the past but have stopped	Currently use it, but occasionally	Never Used it	Used it occasionally in the past but have stopped	Used it occasionally in the past but have stopped	Used it heavily in the past but have stopped	Used it occasionally in the past but have stopped	Never Used it	Yes	Yes	Google translate	translate in word document					Spanish	es	MT with edit	about an unusal travel experience that you had.	Fue muy raro lo que paso la ultima vez que fui al aeropuerto. Lo que fue raro era que todo fue muy rÃ¡pido y cuando me llamaron para entrar el aviÃ³n, me preguntaron muchas preguntas. Como que me estaba investigando o algo. No me creÃ­an cuando yo dije a ellos que yo era pura mexicana y que tuve familia en Mexico. Ellos me dijeron que yo estaba mintiendo porque el color de mi piel y mi cabello er…	It was very strange what happened the last time I went to the airport. What was weird was that everything happened so quickly and when they called me to get on the plane, they asked me a lot of questions. Like he was checking me out or something. They didn't believe me when I told them that I was pure Mexican and that I had family in Mexico. They told me that I was lying because the color of my s…	yes	about a heated argument you recently had with a family member.	Recientemente estaba frustrada porque estaba gomitando porque no estaba sintiendo bien. Mi esposo pregunto si yo estaba bien y pues porque estaba vomitando no podia hablar. Estaba frustrada porque mi esposo no reaccionÃ³ fisicamente, nomas verbalmente. Queien en su mente nomas reacciono con el frase estas bien? Yo no entiendo. Mi esposa no gusto lo que comentÃ© y el estaba muy frustrada tambiÃ©n.…	Recently I was frustrated that I was throwing up because I wasn't feeling well. My husband asked if I was okay and because I was vomiting i couldn't speak. I was frustrated that my husband didn't react physically, just verbally. Who in their right mind just reacted with the phrase are you okay? I do not understand. My husband didn't like what I said and he was very frustrated too. Like defensive.…	yes	P75	Great info	The second translation did not translate as accurately as the first.	MT_with_edit	Disagree	Somewhat agree	Disagree
5e7d11401ae8680ca60eed9e	English							English				Used it occasionally in the past but have stopped	Currently use it heavily	Currently use it heavily	Currently use it heavily	Never Used it	Currently use it heavily	Never Used it	Currently use it, but occasionally	Used it occasionally in the past but have stopped	Used it occasionally in the past but have stopped	Never Used it	Used it occasionally in the past but have stopped	No	Yes	Google Translate						Creole	ht	Manual	"about something funny that happened to you during a meeting."	"Pandan yon reyinyon te gen yon moun ki tap swiv men li te bliye fenmen kamera li a"	"During a meeting, there was one person following along who forgot to take off his camera."	yes	"about a bad experience with an employer or teacher."	"Mwen pa sonje yon move eksperyans ak yon patwon."	-	yes	P69		no	manual_translation	Neutral	Neutral	Neutral
5e7e0e92b7838b4aca1b6fca	English							English				Currently use it heavily	Currently use it, but occasionally	Currently use it, but occasionally	Currently use it heavily	Currently use it, but occasionally	Currently use it heavily	Used it heavily in the past but have stopped	Used it occasionally in the past but have stopped	Currently use it, but occasionally	Currently use it, but occasionally	Currently use it, but occasionally	Used it heavily in the past but have stopped	Yes	Yes	Google Translate	Bing Translator	DeepL Translator				Spanish	es	Manual	"about a bad retail experience you recently had."	"Compre una cafetera Mr. Coffee, y una semana despuÃ©s de comprarla, la jarra se cayÃ³ al piso y se rompiÃ³ en mil pedazos. Ya tengo mÃ¡s de dos semanas tratando de hacer que la compaÃ±Ã­a Mr. Coffee me envÃ­e una jarra de repuesto, pero no sÃ© por quÃ© se estÃ¡n tardando tanto en procesar mi orden."	"I bought a coffee maker from Mr. Coffee, and a week after I bought it, the carafe fell on the floor and broke into a thousand pieces. I've been trying to get Mr. Coffee to send me a replacement for over two weeks now, but I don't know why it's taking so long to process my order."	yes	"about a bad experience with an employer or teacher."	"Tuve un problema en un antiguo trabajo, adonde recibÃ­ una mala evaluaciÃ³n por parte de otro trabajador. Fue despedido, pero tuve la dicha de tener una fuente segura de ingresos proveniente de mi negocio en lÃ­nea."	"I had a problem at a former job, where I received a poor review from another worker. Lucky for me, I already had a steady source of income from my online business."	yes	P64	once word didn't translate correctly, great info	Nothing went wrong in the experiment.	manual_translation	Neutral	Neutral	Agree
5e7e592f6a6ee950b75adb5c	English	German						English	German			Used it occasionally in the past but have stopped	Currently use it, but occasionally	Currently use it heavily	Currently use it, but occasionally	Currently use it heavily	Used it occasionally in the past but have stopped	Never Used it	Never Used it	Currently use it, but occasionally	Used it occasionally in the past but have stopped	Currently use it heavily	Never Used it	Yes	Yes	google translate	Apple translate					German	de	Manual	about a funny situation where you were distracted by your mobile phone.	Ich war mit meine familie am tisch und habe was lustiges verpasst viel ich mit meinem freund getextet habe.	I was at the table with my family and I missed something funny because I was texting my boyfriend.	yes	explaining your opinion about a political controversy.	Ich denke das viele politiker denke nur an sich selbst und nicht an die bewohner in einen ort.	I think that a lot of politicians think only of themselves and not of the inhabitants of a place.	yes	P167	Great info	nope	manual_translation	Strongly disagree	Disagree	Disagree
5e84be4fc39ab0054840a01e	English	German	Sign language					English	German	sign language		Currently use it, but occasionally	Currently use it heavily	Used it occasionally in the past but have stopped	Never Used it	Never Used it	Currently use it, but occasionally	Never Used it	Currently use it, but occasionally	Currently use it, but occasionally	Never Used it	Never Used it	Currently use it, but occasionally	Yes	Yes	google	babblefish					German	de	Manual	about an unusal travel experience that you had.	Ich ging nach Costa Rica fÃ¼r zahnÃ¤rztliche Arbeiten	I went to Costa Rica for dental work	yes	explaining your opinion about a political controversy.	Die Vereinigten Staaten hÃ¤tten auf die russische Drohung an die SupermÃ¤chte Ã¼ber ein Engagement in der Ukraine reagieren sollen	The United States should have responded to the Russian threat to the superpowers about involvement in Ukraine	yes	P192	ok	No it was fine	MT_with_edit	Agree	Agree	Disagree
5e8cf2990fa7b60ba8b4a657	English	Haitian creole						English	Haitian creole			Used it occasionally in the past but have stopped	Currently use it, but occasionally	Currently use it, but occasionally	Currently use it heavily	Currently use it, but occasionally	Used it heavily in the past but have stopped	Currently use it heavily	Used it heavily in the past but have stopped	Currently use it heavily	Used it occasionally in the past but have stopped	Currently use it heavily	Used it occasionally in the past but have stopped	Yes	Yes	google translate						French	fr	MT with edit	about a bad retail experience you recently had.	Ye swa m te all no ow Ross pom achte oun valice. Lem gade place la ferme epi tout pot yo take.	Last night i went to ross to buy a purse. When I looked the place was closed and the doors were lcoked.	yes	about a heated argument you recently had with a family member.	M pa eme goume avec mon. Muman selma vle nou fe lagan	I DONT LIKE TO FIGHT. My mom just wants us to make money/	yes	P197	good	no	manual_translation	Strongly disagree	Agree	Neutral
5e9b8d6577f86e0a261075a1	English	Spanish						English				Currently use it, but occasionally	Used it occasionally in the past but have stopped	Currently use it, but occasionally	Never Used it	Never Used it	Currently use it heavily	Never Used it	Currently use it, but occasionally	Never Used it	Never Used it	Never Used it	Currently use it, but occasionally	Yes	Yes	Google Translate						Spanish	es	MT with edit	about a bad retail experience you recently had.	Estaba un customer rudo y uso much tiempo en la tienda	I was a rude customer and i used a lot of time in the store	yes	about a bad experience with an employer or teacher.	Yo tenia un jefe que nunca me dejes salir temprano, quantity termino mi trabajo temprano	I had a boss who never let me leave early, quantityfinished my work early	no	P184	Good	Nothing had went wrong	MT_with_edit	Strongly disagree	Strongly agree	Agree
5ea3aa462d77061c2a8fc5d6	English	Spanish	Chinese					English	Chinese			Currently use it, but occasionally	Currently use it heavily	Currently use it heavily	Currently use it, but occasionally	Currently use it, but occasionally	Currently use it heavily	Used it occasionally in the past but have stopped	Currently use it heavily	Currently use it, but occasionally	Used it occasionally in the past but have stopped	Used it occasionally in the past but have stopped	Used it occasionally in the past but have stopped	Yes	Yes	google translate						Cantonese	uz and vi ??	Manual	about a bad retail experience you recently had.	WÇ’ zÇ’u jÃ¬n shÄngdiÃ n, mÇŽshÃ ng jiÃ¹ shÃ²udÃ ole huÄnyÃ­ng. GÅngrÃ©nmen yÄ«zhÃ­ gÄ“nzhe wÇ’, kÃ nzhe wÇ’. GÇŽnjuÃ© jiÃ¹ xiÃ ng tÄmen rÃ¨nwÃ©i wÇ’ shÃ¬ xiÇŽotÅu, zhÃ¨ hÄ›n bÃº shÅ«fÃº. WÇ’ yÄ«ncÇ lÃ­kÄile shÄngdiÃ n, shÃ¨nzhÃ¬ mÃ©iyÇ’u jÄ«huÃ¬ kÃ n yÄ«fÃº.	i went into the store and was greeted right away. The workers were following me around and watching me. It felt like they thought i was a thief, it was very uncomfortable. I left the store because of that and didnt even get a chance to look at clothing.	yes	explaining your opinion about a political controversy.	WÅ«kÃ¨lÃ¡n zhÃ¨ngzÃ i fÄshÄ“ng de shÃ¬qÃ­ng shÃ¬ fÄ“ichÃ¡ng cuÃ²wÃ¹ de. RÃ©nmen zÃ i zÃ¬jÇ de fÃ¡ngzi lÇ bÃ¨i shÄ, mÃ©iyÇ’u rÃ©n nÃ©ng bÄngmÃ¡ng. ZhÃ¨ shÃ¬ yÄ« jiÃ n fÄ“ichÃ¡ng kÄ›bÄ“i de shÃ¬qÃ­ng, Ã©rqiÄ› bÃ¹rÃ©ndÃ o. ÃˆluÃ³sÄ« duÃ¬ wÃºgÅ« mÃ­nzhÃ²ng zhÃ¨yÃ ng zuÃ² shÃ¬ cuÃ²wÃ¹ de.\n	what is going on in ukraine is very wrong. The people are being killed in their own houses and nobody is there to help. It is a very sad thing and not humane. Russia is wrong for doing this to innocent people.	yes	P128	Great info	no this was a great study	manual_translation	Somewhat agree	Neutral	Somewhat agree
5ea92954ef7ece00096faf5a	English	Mandarin Chinese	Shanghaiese					English				Currently use it, but occasionally	Currently use it, but occasionally	Currently use it heavily	Used it occasionally in the past but have stopped	Used it heavily in the past but have stopped	Currently use it heavily	Currently use it heavily	Currently use it heavily	Currently use it heavily	Currently use it, but occasionally	Currently use it, but occasionally	Used it heavily in the past but have stopped	Yes	Yes	Google translate	wechat translate					Chinese	zh-CN	Only MT	about an unusal travel experience that you had.	2017å¹´æˆ‘åŽ»äº†éŸ©å›½çŽ©ã€‚æˆ‘è·Ÿæˆ‘çš„æœ‹å‹ä¸€èµ·åŽ»äº†ä¸‰ä¸ªç¤¼æ‹œã€‚åœ¨éŸ©å›½çš„æ—¶å€™æˆ‘ä»¬åƒäº†ä¸€ç§é±¼ï¼Œè‹±è¯­å«hagfishã€‚è¿™ä¸ªé±¼åœ¨ç«ä¸Šçƒ§çš„æ—¶å€™ä¼šåŠ¨ï¼Œåƒåœ¨è·³èˆžã€‚æˆ‘è§‰å¾—éžå¸¸å¯æ€•ï¼Œä¹Ÿæœ‰ç‚¹æ¶å¿ƒã€‚	In 2017 I went to Korea to play. I went with my friend for three weeks. When we were in Korea we ate a type of fish called hagfish in English. When the fish is on the fire, it will move, like dancing. I felt very scary and a little disgusting.	yes	about a heated argument you recently had with a family member.	ä¸Šä¸ªç¤¼æ‹œæˆ‘è·Ÿæˆ‘çš„çˆ¶æ¯åœ¨è®¨è®ºæ€Žä¹ˆè·Ÿæˆ‘çš„è€æ¿è®²æˆ‘è¦èµ°çš„äº‹æƒ…ã€‚æˆ‘çš„çˆ¸çˆ¸ä¸€å®šè¦æˆ‘è·Ÿä»–é¢å¯¹é¢å°†ï¼Œå¯æ˜¯æˆ‘ä»¬çŽ°åœ¨è¿˜éƒ½åœ¨å®¶ä¸Šç­ã€‚æˆ‘è·Ÿä»–è¯´æˆ‘æ²¡åŠžæ³•è·Ÿæˆ‘çš„è€æ¿è§é¢ï¼Œä»–å°±è§‰å¾—è¿™å¾ˆä¸æœ‰ç¤¼è²Œã€‚	Last week I was discussing with my parents how to tell my boss that I was leaving. My dad made sure I met him face-to-face, but we still work from home. I told him I couldn't meet my boss and he thought it was rude.	yes	P10	good	no	MT_with_edit	Somewhat agree	Agree	Somewhat agree
5eacd804f32e3b346f023b32	English	Korean						English	Korean			Used it heavily in the past but have stopped	Used it occasionally in the past but have stopped	Currently use it, but occasionally	Never Used it	Used it occasionally in the past but have stopped	Currently use it heavily	Never Used it	Currently use it heavily	Never Used it	Never Used it	Currently use it heavily	Currently use it, but occasionally	Yes	Yes	Google Translate	Papago					Korean	ko	Only MT	about a bad retail experience you recently had.	í•œë²ˆ Amazon ì—ì„œ ìƒí’ˆì„ ì£¼ë¬¸í–ˆìŠµë‹ˆë‹¤. ìƒˆìƒí’ˆì¸ë°ë„ ì¤‘ê³ ë¡œ ì™”ìŠµë‹ˆë‹¤. ê·¸ë“¤ì€ ë‚´ ë°˜í™˜ì„ ìˆ˜ë½í•˜ì§€ ì•Šì„ ê²ƒìž…ë‹ˆë‹¤.	I once ordered a product from Amazon. Even though it is new, it came second hand. They will not accept my return.	yes	about a bad experience with an employer or teacher.	í•œë²ˆ ì„ ìƒë‹˜ì´ ë‚´ê°€ 10ë¶„ ëŠ¦ê²Œ ê³¼ì œë¥¼ ì œì¶œí•˜ëŠ” ê²ƒì„ í—ˆë½í•˜ì§€ ì•Šìœ¼ì…¨ìŠµë‹ˆë‹¤. ê¸°í•œì´ ì§€ë‚¬ìŒì—ë„, ê·¸ë…€ëŠ” ë§¤ìš° ì—„ê²©í•´ ë³´ì˜€ë‹¤.	Once, my teacher did not allow me to turn in my assignments 10 minutes late. Despite the deadline, she looked very strict.	yes	P188	Great info	No	MT_with_edit	Neutral	Somewhat disagree	Somewhat disagree
5eb02a40b17a8c0868685d32	English	Italian	Spanish					English	Italian			Currently use it heavily	Currently use it heavily	Currently use it heavily	Currently use it heavily	Currently use it, but occasionally	Currently use it, but occasionally	Never Used it	Used it occasionally in the past but have stopped	Currently use it heavily	Currently use it, but occasionally	Currently use it, but occasionally	Never Used it	No	Yes	Google						Italian	it	MT with edit	about a bad retail experience you recently had.	Il vestito che ho comprato ieri oggi ha il 50% di scontoâ€¦.che ingiusto!	The dress I bought yesterday today has a 50% discount ... how unfair!	yes	about a heated argument you recently had with a family member.	Che discussione con mia sorella ieriâ€¦non rispetta mai gli impegni presi	What a discussion with my sister yesterdayâ€¦ she never respects her commitments	yes	P67	good	No	MT_with_edit	Somewhat disagree	Somewhat agree	Somewhat disagree
5ebc74759921f30c68adcc7a	English	Italian						English				Currently use it heavily	Currently use it heavily	Currently use it heavily	Currently use it heavily	Currently use it, but occasionally	Currently use it, but occasionally	Never Used it	Never Used it	Currently use it, but occasionally	Currently use it, but occasionally	Currently use it, but occasionally	Never Used it	No	Yes	Google translate						Italian	it	Manual	"about something funny that happened to you during a meeting."	"Grazie a tutti per aver attivamente partecipato all riunione di oggi, ma sarebbe stato bello se qualcuno, oltre me, avesse almeno parlato!"	"Thank you for actively participating in today's meeting, would have been nice if someone spoke other than me!"	yes	"about a bad experience with an employer or teacher."	"Dopo tutte le ore di straordinario, non mi hanno dato la promozione promessa..."	"After all the extra hours put in at work, I didn't get the promotion I was promised..."	yes	P87	Great info	no	manual_translation	Strongly disagree	Agree	Strongly disagree
5ec76194079cdc1b61767c3b	English							English				Currently use it, but occasionally	Currently use it, but occasionally	Currently use it, but occasionally	Currently use it, but occasionally	Never Used it	Currently use it heavily	Never Used it	Currently use it heavily	Currently use it, but occasionally	Never Used it	Never Used it	Never Used it	Yes	Yes	Google translate						Chinese	zh-CN	Only MT	about a funny situation where you were distracted by your mobile phone.	æˆ‘çš„æ‰‹æœºå“çš„å¤ªå¤§äº†ã€‚ ç”¨çš„æ—¶å€™ä¸ºä»€ä¹ˆè¿˜è¦å‘å£°éŸ³å‘¢ã€‚	My phone is ringing too loudly. Why does it make a sound when using it?	yes	about a heated argument you recently had with a family member.	æˆ‘çš„è€å¦ˆæƒ³åŽ»æ—…æ¸¸ã€‚ çŽ°åœ¨ä¸æ˜¯é‚£ä¸ªæ—¶é—´ã€‚	My mother wants to travel. Now is not that time.	yes	P53	ok	no	only_MT	Agree	Agree	Neutral
5eca36ad460a2b19ab37697b	English	Spanish						English				Currently use it, but occasionally	Currently use it, but occasionally	Currently use it, but occasionally	Used it heavily in the past but have stopped	Used it heavily in the past but have stopped	Currently use it heavily	Used it heavily in the past but have stopped	Currently use it, but occasionally	Currently use it, but occasionally	Currently use it, but occasionally	Currently use it, but occasionally	Used it heavily in the past but have stopped	Yes	Yes	Google translation						Spanish	es	Manual	about something funny that happened to you during a meeting.	Habia una vez una chica que me gustaba mucho y estabamos en una junta de escuela. Ella parecia que yo le gustaba tambien asi que hubo una dinamica y teniamos que trabajar en pareja y le propuse a ella que fuera mi pareja en el proyecto. Todo fue muy divertido, ahora ella es mi esposa y siempre que hablamos de esa junta que tuvimos nos reimos y nos hace recordar a algo chistoso.	Once upon a time there was a girl I really liked and we were at a school meeting. She seemed to like me too, so there was a dynamic and we had to work as a couple and I proposed her to be my partner in the project. Everything was very funny, now she is my wife and whenever we talk about that meeting we laugh and it reminds us of something funny.	yes	about a heated argument you recently had with a family member.	Hace como un aÃ±o tuvimos una discusion con mi primo porque no estÃ¡bamos de acuerdo quien iba a manejar. Ya que tenÃ­amos planes para viajar con la familia pero no nos habÃ­amos puesto de acuerdo con mi primo y nos agarramos a golpes y casi nos destruimos las caras hasta que un tÃ­o nos separo. Ya despuÃ©s los dos manejamos, solo nos turnamos y luego hicimos las pases.	About a year ago we had an argument with my cousin because we didn't agree on who was going to drive. Since we had plans to travel with the family but we had not agreed with my cousin and we hit each other and almost destroyed each other's faces until a guy separated us. Later we both drove, we just took turns and then we became best friends.	yes	P142	Great info	no	manual_translation	Somewhat agree	Neutral	Somewhat disagree
5ed46567b49d4842e6c0b846	English	Spanish						English				Currently use it, but occasionally	Currently use it heavily	Currently use it, but occasionally	Never Used it	Currently use it, but occasionally	Currently use it heavily	Never Used it	Never Used it	Used it occasionally in the past but have stopped	Currently use it, but occasionally	Currently use it heavily	Never Used it	No	Yes	Google Translate						Spanish	es	Manual	about a funny situation where you were distracted by your mobile phone.	hola como estas		yes	explaining your opinion about a political controversy.	Estoy cansada	Im so tired	yes	P207	irrelevant response	I wanted to type in English	manual_translation	Somewhat agree	Agree	Disagree
5edc0b5819fa7f8ba7567231	English	German	Chinese (mandarin)					English	German	Chinese (Mandarin)		Used it occasionally in the past but have stopped	Currently use it heavily	Currently use it heavily	Currently use it, but occasionally	Currently use it heavily	Used it heavily in the past but have stopped	Never Used it	Used it occasionally in the past but have stopped	Currently use it, but occasionally	Currently use it, but occasionally	Currently use it heavily	Never Used it	Yes	Yes	Google Translate						German	de	Only MT	about a funny situation where you were distracted by your mobile phone.	Ich brauchte auf Toilette gehen, aber musste warten. Also, habe Ich aufs meine Handy gegangen und bin zu nar zum Tur gestanden. Wen die Frau ins Toilette ist raus gekommen, sie hat mich angestoÃŸen weil ich zu nar war!	I needed to go to the bathroom but had to wait. So I got on my cell phone and stood by the door. When the woman came out of the toilet, she pushed me because I was too scared!	yes	explaining your opinion about a political controversy.	Ich denke das die zwei politische Parteien in den USA sind Komplet anderes. Jetzt niemand will zusammen arbeiten und Leuten wollen nicht mehr ans anderen hÃ¶ren.	I think the two political parties in the US are completely different. Now nobody wants to work together and people don't want to listen to each other anymore.	yes	P60	good	nope	only_MT	Somewhat agree	Disagree	Neutral
5edc195a95d5090e1c3f91b2	English	Spanish						English				Used it heavily in the past but have stopped	Used it occasionally in the past but have stopped	Currently use it, but occasionally	Currently use it, but occasionally	Used it heavily in the past but have stopped	Currently use it heavily	Used it occasionally in the past but have stopped	Currently use it heavily	Used it occasionally in the past but have stopped	Never Used it	Used it occasionally in the past but have stopped	Never Used it	No	Yes	Google Translate	DeepL					Spanish	es	Only MT	about an unusal travel experience that you had.	Una vez, viajÃ© a Chicago con mi familia cuando era muy joven. Mi papÃ¡ tenÃ­a una conferencia, asÃ­ que mi mamÃ¡ y yo visitamos un centro comercial cercano. CorrÃ­ delante de mi mamÃ¡ y tomÃ© el elevador sin ella. SeguÃ­ corriendo y no sabÃ­a que ella no estaba detrÃ¡s de mÃ­.	Once, I traveled to Chicago with my family when I was very young. My dad had a conference, so my mom and I visited a nearby mall. I ran ahead of my mom and took the elevator without her. I kept running and didn't know that she wasn't behind me.	yes	about a heated argument you recently had with a family member.	Yo no puedo recordar una discusiÃ³n acalorada que tuve recientemente. En general me llevo bien con mi familia y somos muy respetuosos.	I can't remember a heated argument I had recently. In general I get along well with my family and we are very respectful.	yes	P156	Great info	No.	only_MT	Somewhat agree	Somewhat agree	Agree
5ededc7ab3595e17ef9533df	English	Spanish						English	Spanish			Currently use it heavily	Never Used it	Currently use it heavily	Currently use it heavily	Currently use it heavily	Currently use it heavily	Never Used it	Currently use it heavily	Currently use it, but occasionally	Used it occasionally in the past but have stopped	Never Used it	Used it occasionally in the past but have stopped	Yes	Yes	Google						Spanish	es	Only MT	about a bad retail experience you recently had.	Hace poco estuve en Target porque tenÃ­a que devolver un artÃ­culo. TenÃ­a el recibo, el artÃ­culo, todo lo necesario para devolverlo y obtener un reembolso. Sin embargo, por alguna razÃ³n, la polÃ­tica de devoluciÃ³n decÃ­a que mis 30 dÃ­as habÃ­an pasado aunque no habÃ­a sido una semana. Tuve que esperar alrededor de una hora y media para que se hiciera la correcciÃ³n.	I was recently at Target because I had to return an item. I had the receipt, the item, everything I needed to return it for a refund. However, for some reason, the return policy said that my 30 days had passed even though it hadn't been a week. I had to wait about an hour and a half for the fix to be made.	yes	about a heated argument you recently had with a family member.	La polÃ­tica es algo que me apasiona. Bueno, los desacuerdos ocurren dentro de mi familia, especialmente cuando se trata de abordar teorÃ­as de conspiraciÃ³n. Mi primo y yo discutimos sobre las vacunas contra el COVID y tuve que hacerles saber que estaban recibiendo informaciÃ³n errÃ³nea y mentiras que intentaban manipularlos.	Politics is something I am passionate about. Well, disagreements happen within my family, especially when it comes to tackling conspiracy theories. My cousin and I discussed COVID vaccines and I had to let them know that they were receiving misinformation and lies that were trying to manipulate them.	yes	P151	Great info	No, nothing. Everything went well.	only_MT	Somewhat agree	Neutral	Disagree
5ee8c7fc15b7921df9c2d2a6	English	Spanish						English	Spanish			Currently use it, but occasionally	Never Used it	Currently use it, but occasionally	Currently use it, but occasionally	Currently use it heavily	Currently use it heavily	Never Used it	Currently use it heavily	Never Used it	Currently use it, but occasionally	Currently use it heavily	Never Used it	Yes	Yes	Google Translate						Spanish	sp	Only MT	"about something funny that happened to you during a meeting."	"Estaba viendo videos en mi celular y no me fije que tenÃ­a mi micrÃ³fono prendido. Todos en la reuniÃ³n escucharon los videos que estaba viendo. \n"	"I was watching videos on my cell phone and I didn't notice that I had my microphone on. Everyone in the meeting listened to the videos he was watching.\n"	yes	"about a heated argument you recently had with a family member."	"Ya son varias veces que discuto con mi mamÃ¡ sobre lo que quiero estudiar. Ya me tiene harta."	"There are already several times that I argue with my mom about what I want to study. I'm already fed up."	yes	P4	Great info	The second prompt loaded endlessly. I refreshed the page and redid both prompts.	MT_with_edit	Somewhat agree	Somewhat agree	Neutral
5efcefeac4b0aa115037925a	English	Yoruba						English				Currently use it heavily	Used it occasionally in the past but have stopped	Currently use it heavily	Currently use it heavily	Currently use it, but occasionally	Currently use it, but occasionally	Never Used it	Never Used it	Used it occasionally in the past but have stopped	Currently use it, but occasionally	Currently use it, but occasionally	Never Used it	Yes	Yes	Google, Translator	Babbel					Portugese	pt	MT with edit	about an unusal travel experience that you had.	Eu viajei ao Mexico mas eu nao gostei a minha estadia.	I traveled to Mexico but I didn't enjoy my stay.	yes	about a heated argument you recently had with a family member.	Eu sabe cozinhar muitas comidas. Quando estou cozinhando, eu escute as musicas.	I know how to cook a lot of food. When I'm cooking, I listen to the music.	yes	P59	ok	No.	MT_with_edit	Disagree	Agree	Disagree
5f0395a63963d05bc235abdb	English	French						English				Currently use it, but occasionally	Currently use it heavily	Currently use it, but occasionally	Currently use it heavily	Never Used it	Currently use it heavily	Never Used it	Used it occasionally in the past but have stopped	Currently use it, but occasionally	Currently use it, but occasionally	Never Used it	Never Used it	Yes	Yes	Google translate						French	fr	Manual	"about something funny that happened to you during a meeting."	"Lâ€™ors dâ€™une reunion zoom lâ€™enfant de quelquâ€™en a traverse la reunion sans pantalon "	"During the zoom meeting someoneâ€™s kid ran through the meeting without pants on."	yes	"explaining your opinion about a political controversy."	"Donald trump est responsible de lâ€™insurrection de lâ€™annee derniere le 6 Janvier"	"Donald Trump is responsible for the interaction last year on January 6"	yes	P90	Good	No	manual_translation	Somewhat agree	Somewhat agree	Neutral
5f0c7ea47cf1495f4587f741	French	German						English	French			Never Used it	Used it occasionally in the past but have stopped	Never Used it	Never Used it	Never Used it	Currently use it, but occasionally	Never Used it	Currently use it heavily	Used it occasionally in the past but have stopped	Currently use it heavily	Currently use it, but occasionally	Used it occasionally in the past but have stopped	No	Yes	Google Translate						French	fr	Only MT	about a bad retail experience you recently had.	Il y a quelques mois, j'ai achete une paire de rideaux pour ma chambre a coucher sur Internet mais quand ils ont ete livres, un des rideaux avait un enorme trou. J'etais furieuse mais la compagnie m'a remboursee. Il faut toujours etre prevoyant.	A few months ago I bought a pair of curtains for my bedroom on the internet but when they were delivered one of the curtains had a huge hole in it. I was furious but the company refunded me. You always have to be foresighted.	yes	about a heated argument you recently had with a family member.	Mon mari et moi avions decide de faire reparer l'exterieur de la maison ainsi que de la faire repeindre. Nous n'etions pas tout a fait d'accord sur la facon de reparer une partie de la maison et nous nous sommes disputes a ce sujet. Finalement c'est le peintre qui a mis fin a la dispute en proposant une reparation qui nous convenait a tous les deux.	My husband and I decided to have the exterior of the house repaired and painted. We didn't quite agree on how to fix part of the house and we argued about it. In the end, it was the painter who put an end to the dispute by proposing a remedy that suited both of us.	yes	P35		Nothing at all	only_MT	Somewhat agree	Agree	Neutral
5f1091aa4bd173363a9700ec	English	Spanish						English				Currently use it, but occasionally	Currently use it, but occasionally	Currently use it heavily	Currently use it heavily	Used it occasionally in the past but have stopped	Currently use it heavily	Never Used it	Currently use it, but occasionally	Currently use it, but occasionally	Currently use it, but occasionally	Currently use it, but occasionally	Used it heavily in the past but have stopped	I am not sure	Yes	Google Translate						Spanish	es	Only MT	about a bad retail experience you recently had.	Estoy feliz, adelante bastante mi dia durante temprano en la maÃ±ana.	I am happy, I advance my day quite a lot during early morning.	yes	explaining your opinion about a political controversy.	Creo que los abortos deberian ser ilegales, excepto algunos casos en especifico en los cuales un aborto podria ser legal.	I believe that abortions should be illegal, except for some specific cases in which an abortion could be legal.	yes	P127	ok	No.	only_MT	Somewhat disagree	Somewhat agree	Somewhat agree
5f277b65f7a08b59041584b2	English	Spanish	Cantonese					English	Cantonese			Used it occasionally in the past but have stopped	Never Used it	Currently use it, but occasionally	Currently use it, but occasionally	Currently use it, but occasionally	Currently use it heavily	Never Used it	Currently use it heavily	Used it heavily in the past but have stopped	Currently use it, but occasionally	Currently use it heavily	Used it occasionally in the past but have stopped	Yes	Yes	Google Translate	SpanishDict					Spanish	es	Manual	about a funny situation where you were distracted by your mobile phone.	Ayer, estaba hablando con mi amiga sobre la tarea de nuestra clase de matemÃ¡ticas, pero durante esta conversaciÃ³n, veÃ­a un TikTok sobre un nuevo reto de baile. Le mostrÃ© a mi amiga el TikTok y tratÃ¡bamos de repetir el reto. Â¡Fue muy divertido!	Yesterday, I was talking with a friend about our math homework, but during the conversation, I saw a TikTok about a new dance challenge. I showed my friend the TikTok and we tried to repeat the challenge. It was a lot of fun!	yes	explaining your opinion about a political controversy.	Creo que es muy malo que haya una gran cantidad de conflictos en la polÃ­tica de los Estados Unidos. Muchas personas no le gusta el presidente ahora y prefieren el presidente del pasado, pero creo que la presidente ahora es mejor que antes. AdemÃ¡s, creo que hay muchas polÃ­ticas controvertidas en algunos estados, como las polÃ­ticas estrictas sobre el aborte en Texas.	I think that is it very bad that there is a lot of conflict in the politics of the United States. Many people do not like the president right now and prefer the past president, but I think that the president now is better than before. Moreover, I think that there are many controversial policies in the states, like the strict policies on abortion in Texas.	yes	P140	Great info	I thought I was selecting the language that I would translate into at first, and I was not expecting to have to write in Spanish. I also wanted to edit my original message after seeing some mistakes, but I could not.	manual_translation	Somewhat disagree	Somewhat agree	Somewhat agree
5f330e8f72030b0fa290a172	English	Bengali						English	Bengali			Currently use it, but occasionally	Currently use it heavily	Currently use it heavily	Currently use it heavily	Used it occasionally in the past but have stopped	Currently use it heavily	Used it occasionally in the past but have stopped	Used it heavily in the past but have stopped	Currently use it, but occasionally	Never Used it	Used it occasionally in the past but have stopped	Never Used it	Yes	Yes	Google Translation	Microsoft Bing					Bengali	bn	MT with edit	about a bad retail experience you recently had.	à¦•à¦¯à¦¼à§‡à¦•à¦¦à¦¿à¦¨ à¦†à¦—à§‡ à¦†à¦®à¦¿ à¦¹à§‹à¦Ÿà§‡à¦²à§‡ à¦†à¦®à¦¾à¦° à¦¬à¦¨à§à¦§à§à¦¦à§‡à¦° à¦¸à¦¾à¦¥à§‡ à¦–à§‡à¦¤à§‡ , à¦¦à¦¿à¦¨à¦Ÿà¦¾ à¦–à§à¦¬ à¦®à¦§à§à¦° à¦›à¦¿à¦² à¥¤ à¦•à¦¿à¦¨à§à¦¤à§ à¦•à¦·à§à¦Ÿà§‡à¦° à¦¬à¦¿à¦·à§Ÿ à¦¹à¦²à§‹ , à¦†à¦®à¦¾à¦° à¦“à§Ÿà¦¾à¦²à§‡à¦Ÿ à¦šà§à§œà¦¿ à¦¹à§Ÿ , à¦à¦¬à¦‚ à¦†à¦®à¦¿ à¦…à¦¨à§‡à¦• à¦¬à¦¿à¦ªà¦¦à§‡ à¦ªà§œà¦¿ à¥¤	A few days ago I was eating at the hotel with my friends, the day was very sweet. But the trouble is, my wallet was stolen, and I was in a lot of trouble.	yes	about a bad experience with an employer or teacher.	à¦¯à¦–à¦¨ à¦†à¦®à¦¿ à¦¸à¦¬à§‡à¦®à¦¾à¦¤à§à¦° à¦¸à§à¦¨à¦¾à¦¤à¦• à¦¹à¦¯à¦¼à§‡ à¦•à§‹à¦¥à¦¾à¦“ à¦šà¦¾à¦•à¦°à¦¿à¦° à¦œà¦¨à§à¦¯ à¦†à¦¬à§‡à¦¦à¦¨ à¦•à¦°à§‡à¦›à¦¿, à¦¤à¦–à¦¨ à¦à¦•à¦œà¦¨ à¦¨à¦¿à¦¯à¦¼à§‹à¦—à¦•à¦°à§à¦¤à¦¾ à¦†à¦®à¦¾à¦•à§‡ à¦œà¦¿à¦œà§à¦žà¦¾à¦¸à¦¾ à¦•à¦°à§‡à¦›à¦¿à¦²à§‡à¦¨ à¦¯à§‡ à¦†à¦®à¦¾à¦° à¦•à§‹à¦¨ à¦ªà§à¦°à¦¾à¦¸à¦™à§à¦—à¦¿à¦• à¦•à¦¾à¦œà§‡à¦° à¦…à¦­à¦¿à¦œà§à¦žà¦¤à¦¾ à¦†à¦›à§‡ à¦•à¦¿…	When I had just graduated and applied for a job somewhere, an employer asked me if I had any relevant work experience. I just passed, sir, how is your work experience? However, I have done some part time part time in varsity life.\n Then the employer said with a mouth like eating nee juice, aha part time! No we don't count it. We need someone experienced.	yes	P150	Great info	No problem, everything is fine	MT_with_edit	Somewhat disagree	Somewhat agree	Somewhat disagree
5f3bc91327d97393a0c56178	English	Spanish						English	Spanish			Currently use it, but occasionally	Used it occasionally in the past but have stopped	Currently use it, but occasionally	Never Used it	Currently use it, but occasionally	Currently use it heavily	Never Used it	Currently use it, but occasionally	Currently use it, but occasionally	Used it occasionally in the past but have stopped	Currently use it, but occasionally	Used it occasionally in the past but have stopped	No	Yes	Google Translate						Spanish	es	MT with edit	about a funny situation where you were distracted by your mobile phone.	HabÃ­a quedado de verme con mi amigo en un bar para ver a una banda local y no nos encontrÃ¡bamos. Ambos estÃ¡bamos viendo nuestros celulares y mandando textos asi que no estÃ¡bamos viendo por donde caminÃ¡bamos y chocamos y ambos pedimos disculpas inmediatamente y cuando vimos para arriba nos reÃ­mos por quÃ© por fin nos encontramos.	I had arranged to meet my friend at a bar to see a local band and we weren't meeting. We were both looking at our phones and texting so we weren't watching where we were walking and we bumped into each other and we both immediately apologized and when we looked up we laughed why we finally met.	yes	explaining your opinion about a political controversy.	Yo creo que las sanciones contra Rusia deberÃ­an ser mucho mÃ¡s severas por haber invadido a Ucrania.	I think that the sanctions against Russia should be much more severe for having invaded Ukraine.	yes	P33	Great info	Nothing went wrong with the experiment I thought everything worked really well.	only_MT	Strongly agree	Strongly agree	Disagree
5f3ea301ce0b340fbb67f607	English	Urdu						English	Urdu			Used it occasionally in the past but have stopped	Currently use it, but occasionally	Currently use it heavily	Currently use it heavily	Used it heavily in the past but have stopped	Currently use it, but occasionally	Never Used it	Currently use it, but occasionally	Never Used it	Used it occasionally in the past but have stopped	Currently use it heavily	Never Used it	Yes	Yes	GOOGLE TRANSLATE						Spanish	es	Only MT	about an unusal travel experience that you had.	Una extraÃ±a experiencia de viaje que tuve fue cuando mi familia y yo estÃ¡bamos en un viaje por carretera y nos detuvimos en louisiana. Luisiana es un pueblo fantasma. Por la noche Paramos el auto para tomar aire fresco y de repente escuchÃ© la voz de una mujer pero volteÃ© detrÃ¡s de mÃ­ y no habÃ­a nadie allÃ­. Me sentÃ­ como si estuviera siendo observado.	One strange travel experience I had was when my family and I were on a road trip and stopped in Louisiana. Louisiana is a ghost town. At night We stopped the car to get some fresh air and suddenly I heard a woman's voice but I looked behind me and there was no one there. I felt like I was being watched.	yes	about a bad experience with an employer or teacher.	Esta historia me hace enojar mucho. Mi profesor de negocios en la escuela secundaria no me gustaba sin razÃ³n y siempre me hacÃ­a sentarme con chicos, me sentÃ­a sola porque nadie me hablaba. Finalmente me hice amigo del chico que estaba a mi lado y se convirtiÃ³ en mi mejor amigo. De todos modos, estaba entregando un proyecto y lo hice perfectamente, pero me dio un cero porque dijo que no puede …	This story makes me very angry. My business teacher in high school didn't like me for no reason and he always made me sit with guys, I felt lonely because no one talked to me. I finally made friends with the guy next to me and he became my best friend. Anyway, I was submitting a project and I did it perfectly, but it gave me a zero because it said you can't see it on your side of the system. I as…	yes	P84	Great info	no	only_MT	Somewhat disagree	Agree	Somewhat disagree
5f4b283c6e1f3e6ec65c32f6	English	Spanish						English	Spanish			Currently use it heavily	Currently use it heavily	Currently use it, but occasionally	Currently use it, but occasionally	Currently use it, but occasionally	Currently use it heavily	Never Used it	Currently use it, but occasionally	Never Used it	Currently use it, but occasionally	Never Used it	Never Used it	Yes	Yes	Google Translate						Spanish	es	Only MT	about a funny situation where you were distracted by your mobile phone.	hola hoy estoy muy distraido con mi telefono movil aqui viendo una video en mi telefono que me hizo reir	hello today I am very distracted with my mobile phone here watching a video on my phone that made me laugh	yes	explaining your opinion about a political controversy.	soy conservador e independiente por ahora no tengo un opinion	I am conservative and independent for now I do not have an opinion	yes	P222	ok	no everything was great	only_MT	Strongly disagree	Strongly agree	Strongly disagree
5f56a9ac0b905311428399ea	English	Spanish						English				Never Used it	Currently use it heavily	Never Used it	Never Used it	Currently use it, but occasionally	Currently use it heavily	Never Used it	Currently use it heavily	Never Used it	Never Used it	Never Used it	Never Used it	Yes	No							Spanish	es	Manual	about a funny situation where you were distracted by your mobile phone.	Yo quiero hot pot, yo soy ambizado	I want hot pot, I am hungry	yes	about a bad experience with an employer or teacher.	Mo maestro es muy Malo! Chinga	My teacher is very bad shit	yes	P168	ok	No	MT_with_edit	Neutral	Somewhat agree	Neutral
5f5b0f1be585c32184a4cf35	English	Spanish	Polish					English	Spanish	Polish		Currently use it, but occasionally	Currently use it heavily	Currently use it heavily	Never Used it	Never Used it	Currently use it heavily	Never Used it	Currently use it heavily	Never Used it	Never Used it	Never Used it	Never Used it	Yes	Yes	Google translate						Polish	pl	Only MT	about a bad retail experience you recently had.	Zakupy w zeszÅ‚ym tygodniu bardzo mnie wkurzyÅ‚y. PoprosiÅ‚em o szynkÄ™ pokrojonÄ… w cienkie plastry, ale zamiast tego dostaÅ‚em szynkÄ™ grubÄ…. Wiem, Å¼e to gÅ‚upie siÄ™ denerwowaÄ‡, ale teraz brakuje pieniÄ™dzy, wiÄ™c ma to znaczenie.	Shopping last week pissed me off. I asked for ham sliced thinly but got a thick ham instead. I know it's silly to be nervous, but now there's a shortage of money, so it matters.	no	about a heated argument you recently had with a family member.	MÃ³j tata mnie wczoraj tak wkurzyÅ‚! UpieraÅ‚ siÄ™, Å¼e bÄ™dzie padaÄ‡ Å›nieg i bÄ™dzie zimno, ale powiedziaÅ‚em mu, Å¼e bÄ™dzie Å‚adna pogoda.	My dad pissed me off yesterday! He insisted it would snow and be cold, but I told him it would be nice weather.	yes	P71	Good	I would say the translation was somewhat accurate, but not completely exact.	MT_with_edit	Somewhat disagree	Agree	Disagree
5f63a85000cc960cd8c64767	English	Korean						English	Korean	Spanish		Used it occasionally in the past but have stopped	Currently use it heavily	Currently use it heavily	Never Used it	Used it occasionally in the past but have stopped	Currently use it heavily	Never Used it	Currently use it, but occasionally	Used it occasionally in the past but have stopped	Currently use it, but occasionally	Never Used it	Never Used it	I am not sure	Yes	Google	Bing	Babbelfish				Spanish	es	MT with edit	about a bad retail experience you recently had.	Pedi zapatos nuevos online, pero despues de un par de semanas, no recibi me pedido. Me communique con la tienda y me dijeran que no tenian stock.	I ordered new shoes online, but after a couple of weeks, I didn't receive my order. I contacted the store and they told me they had no stock.	yes	explaining your opinion about a political controversy.	No soy muy politico, pero creo que todas las personas en United States deberian tener attencion medica gratuita.	I'm not very political, but I think everyone in the United States should have free health care.	yes	P25	Good info	No, everything worked perfectly!	MT_with_edit	Disagree	Agree	Strongly disagree
5f8120ed0c4ed61e386b4302	English							English	French			Currently use it, but occasionally	Currently use it heavily	Currently use it heavily	Used it occasionally in the past but have stopped	Currently use it, but occasionally	Currently use it heavily	Never Used it	Currently use it, but occasionally	Currently use it, but occasionally	Used it heavily in the past but have stopped	Currently use it, but occasionally	Never Used it	Yes	Yes	Google Translate						French	fr	MT with edit	about a bad retail experience you recently had.	Il y avait une semaine j'ai voulu une nouvelle chemise. Donc, je suis allÃ©e au magasin pour acheter une nouvelle chemise. Il nâ€™y a pas des chemise qui me plaÃ®t alors jâ€™ai parti et jâ€™ai essayÃ© une autre magasin. Encore, il nâ€™avait pas des chemises pour moi (et je suis assez grande) mais câ€™Ã©tait difficile. Finalement, je suis allÃ©e Ã une troisÃ¨me magasin, et en fin, jâ€™ai trouvÃ© u…	A week ago I wanted a new shirt. So I went to the store to buy a new shirt. There are no shirts I like so I left and tried another store. Again, didn't have shirts for me (and I'm quite tall) but it was tough. Eventually, I went to a third store, and eventually found a blue shirt that worked for me.	yes	about a heated argument you recently had with a family member.	Ma mÃ¨re a voulu un gatÃªau pour PÃ¢ques. Jâ€™ai prÃ©fÃ©rÃ© de la glace. Elle a gagnÃ© et nous avons eu un gatÃªau	My mother wanted a cake for Easter. I preferred ice cream. She won and we had a cake	yes	P135	Great info	Everything worked well in the experiment	MT_with_edit	Somewhat agree	Somewhat agree	Disagree
5f85f6513abbee1030bf756d	English	portuguese						English	portuguese			Currently use it heavily	Currently use it, but occasionally	Never Used it	Never Used it	Used it occasionally in the past but have stopped	Currently use it, but occasionally	Never Used it	Currently use it, but occasionally	Currently use it, but occasionally	Used it occasionally in the past but have stopped	Currently use it heavily	Never Used it	Yes	Yes	Google Translate						Portugese	pr	MT with edit	about something funny that happened to you during a meeting.	Eu estava em um quarto e caÃ­ da minha cadeira	I was in a room and I fell out of my chair	yes	about a bad experience with an employer or teacher.	Eu estava a trabalhar e o meu patrao ralhou porque eu fui ou quarto de banho muitas vezes	I was working and my boss scolded me because I went to the bathroom too many times.	yes	P117	Good info	No everything went well and the tool worked perfectly and was very intuitive.	MT_with_edit	Disagree	Agree	Disagree
5fa8aa822e22ef7809425df9	English	Mandarin						English	Mandarin			Used it occasionally in the past but have stopped	Currently use it, but occasionally	Used it occasionally in the past but have stopped	Never Used it	Never Used it	Currently use it heavily	Currently use it heavily	Used it occasionally in the past but have stopped	Used it occasionally in the past but have stopped	Never Used it	Used it occasionally in the past but have stopped	Never Used it	I am not sure	Yes	google translate						Chinese	zh-CN	MT with edit	about a bad retail experience you recently had.	æˆ‘åˆ°äº†ä¸€ä¸ªæ‚è´§åº—æƒ³ä¹°ä¸€ç“¶æ°´ï¼Œä½†æ˜¯ä»–ä»¬åªæœ‰è¿åŠ¨é¥®æ–™æ°´ï¼Œæ²¡æœ‰çº¯å‡€æ°´æˆ–è€…çŸ¿æ³‰æ°´ï¼Œæ„Ÿè§‰å¾ˆä¸å¥½ã€‚	I went to a grocery store and wanted to buy a bottle of water, but they only had sports drink water, no purified or mineral water, and I felt bad about it.	yes	explaining your opinion about a political controversy.	2020å¹´çš„æ€»ç»Ÿé€‰ä¸¾å‰å‡ºçŽ°äº†é»‘äººè¿åŠ¨ï¼Œç¤¾ä¼šæ²»å®‰åŠ¨è¡ï¼Œå¾ˆä»¤äººä¸å®‰ã€‚	Before the 2020 presidential election, there is a black movement, and social security is turbulent, which is very disturbing.	yes	P22	Great info	None	MT_with_edit	Disagree	Agree	Disagree
5fb34f4786f1bb65410c1c87	English							English				Currently use it heavily	Used it occasionally in the past but have stopped	Currently use it heavily	Used it occasionally in the past but have stopped	Currently use it, but occasionally	Currently use it heavily	Never Used it	Currently use it, but occasionally	Currently use it heavily	Never Used it	Currently use it heavily	Never Used it	Yes	Yes	Google translate	Twitter					French	fr	MT with edit	about something funny that happened to you during a meeting.	j'arriver a l'ecole mais j'oublier mon telephoner.	I arrive at school but I forget my phone.	yes	about a bad experience with an employer or teacher.	Mon prof n'aider pas avec mon paper	My teacher did not help with my paper	yes	P223	ok	No	MT_with_edit	Disagree	Strongly agree	Strongly disagree
5fb96682a2e58b7e38a6f5d6	English	Mandarin	Indonesian					English				Currently use it, but occasionally	Currently use it, but occasionally	Never Used it	Used it heavily in the past but have stopped	Never Used it	Currently use it heavily	Used it occasionally in the past but have stopped	Currently use it, but occasionally	Currently use it, but occasionally	Used it occasionally in the past but have stopped	Never Used it	Used it occasionally in the past but have stopped	No	Yes	Google Translate						Indonesian	id	MT with edit	about a funny situation where you were distracted by your mobile phone.	Gua lagi pakai hp gak lihat gua lagi jalan mana jadi ampir jaduh.	I'm using my cellphone, I can't see which way I'm going, so I almost fall.	yes	explaining your opinion about a political controversy.	Gua punya opinion sih itu Biden gak salah soalnya dia dekit sama anak kecil.	I have an opinion that Biden is not wrong because he is close to small children.	yes	P26	Good info	No.	MT_with_edit	Strongly disagree	Strongly agree	Strongly disagree
5fba9fdd33207faa35f61df3	English	Spanish						English				Currently use it, but occasionally	Currently use it heavily	Currently use it, but occasionally	Never Used it	Used it occasionally in the past but have stopped	Currently use it heavily	Never Used it	Used it occasionally in the past but have stopped	Used it occasionally in the past but have stopped	Used it occasionally in the past but have stopped	Used it occasionally in the past but have stopped	Never Used it	No	Yes	Google Translate						Spanish	es	Only MT	about a funny situation where you were distracted by your mobile phone.	Estaba tratando de hablar con mi amiga, pero mi telÃ©fono seguÃ­a reproduciendo una canciÃ³n vergonzosa porque alguien me seguÃ­a llamando.	I was trying to talk to my friend but my phone kept playing an embarrassing song because someone kept calling me.	yes	about a bad experience with an employer or teacher.	Tuve un desacuerdo con mi maestra sobre la calificaciÃ³n que me dio en un trabajo subjetivo que escribÃ­. DespuÃ©s de debatir el gade por un tiempo, me dio una calificaciÃ³n de alquiler, pero ni cerca de lo que merecÃ­a.	I had a disagreement with my teacher about the grade she gave me on a subjective paper I wrote. After debating the gade for a while, he gave me a rental rating, but nowhere near what I deserved.	no	P36		The translation to my last post was executed incorrectly.	only_MT	Strongly agree	Disagree	Agree
5fd9227fbeeb773aa4d6c986	English	Spanish						English	Spanish			Currently use it heavily	Currently use it heavily	Currently use it heavily	Used it occasionally in the past but have stopped	Currently use it, but occasionally	Currently use it heavily	Currently use it, but occasionally	Currently use it, but occasionally	Used it occasionally in the past but have stopped	Never Used it	Never Used it	Used it heavily in the past but have stopped	Yes	Yes	Google	Bing					Spanish	es	Manual	about a bad retail experience you recently had.	Fui a el CVS que esta aca cerca. Queria comprar unas fotos pero la cola estaba re larga. Y la cajilla automatica no funcionaba. Me tarde diez minutos en salir. Lo odie.	I went to the CVS that was nearby. I wanted to buy some photos but the line was very long. And the automatic checkout was not working. I took minutes to exit. I hated it.	yes	about a bad experience with an employer or teacher.	Mi jefa me hizo trabajar un Sabado y me disgusto mucho. Tuve que cancelar una fiesta con mis amigos. Y no me pagan suficiente.	My boss made me work on a Saturday and I disliked it a lot. I had to cancel a party with my friends. And they don't pay me enough.	yes	P126	Great info	No	manual_translation	Strongly agree	Neutral	Strongly agree
5fdc492c0ad48b18df09305b	English	Russian						English	Russian			Currently use it, but occasionally	Used it occasionally in the past but have stopped	Currently use it heavily	Never Used it	Currently use it heavily	Currently use it heavily	Never Used it	Used it occasionally in the past but have stopped	Used it occasionally in the past but have stopped	Currently use it, but occasionally	Currently use it heavily	Currently use it, but occasionally	Yes	Yes	google translate						Russian	ru	Only MT	about a bad retail experience you recently had.	Ð¯ Ð¿Ð¾ÑˆÐµÐ» Ð² Ð¼Ð°Ð½Ð¸ÐºÑŽÑ€Ð½Ñ‹Ð¹ ÑÐ°Ð»Ð¾Ð½, Ð¸ Ð¼Ð½Ðµ Ð±Ñ‹Ð»Ð¾ Ð¿Ð»Ð¾Ñ…Ð¾, Ð¿Ð¾Ñ‚Ð¾Ð¼Ñƒ Ñ‡Ñ‚Ð¾ Ð¾Ð½Ð¸ Ð·Ð°ÑÑ‚Ð°Ð²Ð¸Ð»Ð¸ Ð¼ÐµÐ½Ñ Ð¶Ð´Ð°Ñ‚ÑŒ Ñ†ÐµÐ»ÑƒÑŽ Ð²ÐµÑ‡Ð½Ð¾ÑÑ‚ÑŒ, Ñ…Ð¾Ñ‚Ñ Ñƒ Ð¼ÐµÐ½Ñ Ð±Ñ‹Ð»Ð° Ð½Ð°Ð·Ð½Ð°Ñ‡ÐµÐ½Ð° Ð²ÑÑ‚Ñ€ÐµÑ‡Ð°.	I went to the nail salon and I felt bad because they made me wait for ages even though I had an appointment.	yes	about a bad experience with an employer or teacher.	ÐœÐ¾Ñ ÑƒÑ‡Ð¸Ñ‚ÐµÐ»ÑŒÐ½Ð¸Ñ†Ð° Ð±Ñ‹Ð»Ð° Ð¿Ð»Ð¾Ñ…Ð¾Ð¹, Ð¿Ð¾Ñ‚Ð¾Ð¼Ñƒ Ñ‡Ñ‚Ð¾ Ñ Ð½Ðµ Ð¼Ð¾Ð³ ÑÐ´Ð°Ñ‚ÑŒ Ñ‚ÐµÑÑ‚, Ð¿Ð¾Ñ‚Ð¾Ð¼Ñƒ Ñ‡Ñ‚Ð¾ Ð¼Ð¾Ð¹ ÐºÐ¾Ð¼Ð¿ÑŒÑŽÑ‚ÐµÑ€ ÑÐ»Ð¾Ð¼Ð°Ð»ÑÑ, Ð¸ Ð¾Ð½Ð° Ð½Ðµ Ð¿Ð¾Ð²ÐµÑ€Ð¸Ð»Ð° Ð¼Ð½Ðµ Ð¸ Ð¿Ð¾ÑÑ‚Ð°Ð²Ð¸Ð»Ð° Ð¿Ð»Ð¾Ñ…ÑƒÑŽ Ð¾Ñ†ÐµÐ½ÐºÑƒ.	My teacher was bad because I couldn't pass the test because my computer was broken and she didn't believe me and gave me a bad grade.	yes	P164	Great info	n/a	only_MT	Somewhat agree	Somewhat disagree	Neutral
5fe4394bc5f99b194c31318b	English	German						English				Currently use it heavily	Currently use it, but occasionally	Currently use it heavily	Never Used it	Currently use it heavily	Currently use it heavily	Never Used it	Currently use it heavily	Currently use it, but occasionally	Used it occasionally in the past but have stopped	Currently use it heavily	Never Used it	No	Yes	Google						German	de	Manual	about an unusal travel experience that you had.	Ich bin einmal nach Deutschland geflogen. Im Flughafen, habe ich zufÃ¤llig mein Freund getroffen. Wir waren auf dem gleichen Flug! Es war sehr witzig und hat SpaÃŸ gemacht.	I once flew to Germany. In the airport, I coincidentally met my friend. We were on the same flight! It was very funny and was a lot of fun.	yes	about a heated argument you recently had with a family member.	Mein Bruder hat meine Schokolade gegessen. Ich habe meine Name darauf geschreiben aber er hat es ignoriert. Wir haben viel darÃ¼ber gestritten.	My brother ate my chocolate. I wrote my name on it, but he ignored it. We argued a lot about it.	yes	P120	Good info	Nothing went wrong!	manual_translation	Disagree	Disagree	Somewhat agree
5ff21e8299e7cf6d2d1a7f13	English	Hindi						English				Used it occasionally in the past but have stopped	Currently use it, but occasionally	Never Used it	Currently use it heavily	Never Used it	Currently use it heavily	Currently use it heavily	Currently use it heavily	Used it occasionally in the past but have stopped	Never Used it	Never Used it	Never Used it	I am not sure	Yes	Google translate						Hindi	hi	Only MT	about something funny that happened to you during a meeting.	à¤®à¥ˆà¤‚ à¤•à¥‡à¤²à¥‡ à¤•à¥‡ à¤›à¤¿à¤²à¤•à¥‡ à¤ªà¤° à¤«à¤¿à¤¸à¤² à¤—à¤¯à¤¾\n	I slipped on a banana peel\n	yes	explaining your opinion about a political controversy.	\nà¤®à¥à¤¸à¤²à¤®à¤¾à¤¨ à¤…à¤­à¥€ à¤­à¥€ à¤‡à¤‚à¤¸à¤¾à¤¨ à¤¹à¥ˆà¤‚, à¤‰à¤¨à¥à¤¹à¥‡à¤‚ à¤­à¥€ à¤¹à¤° à¤­à¤¾à¤°à¤¤à¥€à¤¯ à¤•à¥€ à¤¤à¤°à¤¹ à¤¹à¤° à¤…à¤§à¤¿à¤•à¤¾à¤° à¤¦à¤¿à¤¯à¤¾ à¤œà¤¾à¤¨à¤¾ à¤šà¤¾à¤¹à¤¿à¤à¥¤	\nMuslims are still human beings, they should be given every right like every Indian.	yes	P214	good info	No	only_MT	Strongly agree	Disagree	Disagree
6003444a0c3cd706b081fc23	English	Korean						English				Currently use it, but occasionally	Currently use it, but occasionally	Currently use it, but occasionally	Never Used it	Used it occasionally in the past but have stopped	Currently use it heavily	Never Used it	Currently use it, but occasionally	Never Used it	Currently use it, but occasionally	Currently use it heavily	Used it occasionally in the past but have stopped	Yes	Yes	Google						Korean	ko	MT with edit	about something funny that happened to you during a meeting.	ì˜¤ëŠ˜ ë¯¸íŒ…ì„ í•˜ëŠ”ë°, ë°œí‘œë¥¼ í• ì¤€ë¹„ë¥¼ í•˜ëŠ” ë„ì¤‘ì— í‚¤ìš°ëŠ” ê³ ì–‘ì´ê°€ ì»´í“¨í„° ìœ„ë¡œ ì˜¬ë¼ì™€ì„œ ì¹´ë©”ë¼ë¥¼ ê°€ë ¤ë²„ë ¸ë‹¤.	During a meeting today, while I was preparing to give a presentation, my cat climbed up on the computer and obscured the camera.	yes	explaining your opinion about a political controversy.	ë„ë‚ ë“œ íŠ¸ëŸ¼í”„ì— ëŒ€í•œ ì–˜ê¸°ê°€ ë§Žì´ ì˜¤ê³ ê°”ì—ˆëŠ”ë°, ê²°êµ­ì—” ì•ˆì¢‹ì€ ëŒ€í†µë ¹ì´ë¼ê³ ìƒê°í•œë‹¤.	There's been a lot of talk about Donald Trump, but in the end I think he's a bad president.	yes	P131	Great info	nope	only_MT	Agree	Agree	Agree
601ca9b9889d5f811be6946c	English	Spanish	Italian	Chinese	Hebrew	Arabic		English	Spanish			Currently use it, but occasionally	Currently use it heavily	Currently use it heavily	Currently use it, but occasionally	Currently use it, but occasionally	Currently use it heavily	Used it occasionally in the past but have stopped	Currently use it, but occasionally	Currently use it, but occasionally	Currently use it, but occasionally	Currently use it, but occasionally	Used it heavily in the past but have stopped	Yes	Yes	Google	Specific website					Spanish	es	Only MT	about an unusal travel experience that you had.	Fui a Nueva York cuando tenia 13 anos para conocer a un mÃºsico famoso. El viaje y la reuniÃ³n fue planeado por una corporaciÃ³n grande de ropa. Como nunca habia visitado a Nueva York, fue una maravilla ver la ciudad legendaria. Lugares como Times Square, Soho y el estatua de la libertad se han quedado grabado en mi mente para siempre.	I went to New York when I was 13 to meet a famous musician. The trip and meeting was planned by a large clothing corporation. Having never been to New York, it was wonderful to see the legendary city. Places like Times Square, Soho and the Statue of Liberty have been etched in my mind forever.	yes	about a heated argument you recently had with a family member.	Carambas! Mi hermana no entiende que no puedo hacer todo lo que ella dice. Le he tratado de explicar repetidamente, que ciertas acciones no concuerdan con la funciÃ³n de mi trabajo ni con el estilo especÃ­fico de una presentaciÃ³n. No sÃ© que hacer para hacerla entender.	Damn! My sister doesn't understand that I can't do everything she says. I have repeatedly tried to explain to him that certain actions are not consistent with my job function or the specific style of a presentation. I don't know what to do to make her understand.	yes	P14	translated as him instead of her in second prompt	One word was translated incorrectly.	only_MT	Strongly agree	Somewhat agree	Strongly agree
601db2e563979b1a6aac8401	English	French						English				Used it occasionally in the past but have stopped	Currently use it heavily	Used it heavily in the past but have stopped	Never Used it	Never Used it	Used it occasionally in the past but have stopped	Never Used it	Used it heavily in the past but have stopped	Currently use it, but occasionally	Currently use it, but occasionally	Never Used it	Never Used it	Yes	Yes	translate.google.com	Babelfish.com (now bing translate)					French	fr	Only MT	about an unusal travel experience that you had.	Bonjour les amis!\n\nComme vous le savez, j'adore voyager. Bien, le dernier voyage a Ã©tÃ© bizzarre! Nous avions nagÃ© avec les dophins. Merveilleux	Hello friends!\n\nAs you know, I love to travel. Well, the last trip was weird! We had swum with the dophins. Marvellous	no	about a heated argument you recently had with a family member.	Avec l'arrivÃ©e du COVID, les liens famillaux sont de plus en plus difficile. Mes beaux-parents ne veulent pas le vaccin. Ã‰tant donnÃ© ma greffe de poumons, il est primordiale que les gent soient vaccinÃ© quand ils veulent visiter. Eux, ils pensent que je suis trop dramatique.	With the arrival of COVID, family ties are increasingly difficult. My in-laws don't want the vaccine. Given my lung transplant, it is essential that people are vaccinated when they want to visit. They think I'm too dramatic.	yes	P27	Great info	Just en error on the first translation Swum is not a word.	only_MT	Agree	Somewhat disagree	Disagree
603b5b001967b3805746bebd	English	Spanish						English	Spanish			Used it occasionally in the past but have stopped	Used it occasionally in the past but have stopped	Currently use it heavily	Currently use it, but occasionally	Used it occasionally in the past but have stopped	Currently use it heavily	Never Used it	Currently use it, but occasionally	Used it heavily in the past but have stopped	Never Used it	Never Used it	Never Used it	No	Yes	Google translate						Spanish	es	Manual	about something funny that happened to you during a meeting.	Yo estaba conversando con mi amigo cuando una persona se tiro un peo por accidente. Todo el mundo se puso a reir.	I was having a conversation with my friend but someone farted by accident. Everyone started laughing.	yes	about a bad experience with an employer or teacher.	Yo estaba sacando un lapiz de mi muchila pero la maestra se enojo porque you estaba siendo mucho ruido.	I was taking a pencil out from my bookbag but my teacher got mad at me because I was making too much noise.	yes	P162	Great info	Nothing went wrong.	manual_translation	Neutral	Somewhat agree	Disagree
603d90a1cd5c8ec6df906814	English	Mandarin						English	Mandarin			Currently use it, but occasionally	Currently use it, but occasionally	Currently use it heavily	Used it occasionally in the past but have stopped	Used it heavily in the past but have stopped	Currently use it heavily	Used it occasionally in the past but have stopped	Currently use it heavily	Currently use it, but occasionally	Used it occasionally in the past but have stopped	Currently use it heavily	Used it occasionally in the past but have stopped	Yes	Yes	Google translate						Spanish	es	MT with edit	about a bad retail experience you recently had.	En el restaurante, el mesero me sirvio la comida incorecta.	At the restaurant, the waiter served me the wrong food.	yes	about a bad experience with an employer or teacher.	Mi jefe no me dio un aumento este ano.	My boss didn't give me a raise this year.	yes	P199	OK	No	MT_with_edit	Somewhat disagree	Agree	Disagree
60477705b440ae26c4aaf5bb	English	German	Hebrew					English	Hebrew			Currently use it, but occasionally	Currently use it, but occasionally	Currently use it, but occasionally	Used it heavily in the past but have stopped	Never Used it	Currently use it heavily	Never Used it	Currently use it heavily	Used it occasionally in the past but have stopped	Used it occasionally in the past but have stopped	Never Used it	Never Used it	Yes	Yes	Google Translate	Morfix					Hebrew	iw	MT with edit	about an unusal travel experience that you had.	× ×”×’×ª×™ ×•×“×™×‘×¨×ª×™ ×‘×˜×œ×¤×•×Ÿ, ×•×§×™×‘×œ×ª×™ ×›×¨×˜×™×¡ ×©×œ 500 ×©"×—.	I drove and talked on the phone, and got a 500 NIS ticket.	yes	explaining your opinion about a political controversy.	×”×ª×§×©×•×¨×ª ×‘"×ž×œ×—×ž×ª ×”×˜×™×§-×˜×•×§" ××ž× × ×¢×ž×•×¡×” ×‘×ž×’×•×•×Ÿ ×’×“×•×œ ×©×œ ×ž×œ×œ, ×¡×¨×˜×•× ×™× ×•×ª×ž×•× ×•×ª, ××š × ×¢×“×¨×™× ×ž×ž× ×” ×”×“×™×•×•×—×™× ×ž×©×“×” ×”×§×¨×‘, ×‘×™×™×—×•×“ ×ž×”×¦×“ ×”×¨×•×¡×™.	Although the media in the "tiktok war" is laden with a large variety of text, videos and photos, there are no reports from the battlefield, especially from the Russian side.	yes	P37		No, but I had to allow a lot of JavaScript to get the translation site to work. I block JavaScript except from known sources by default.	MT_with_edit	Strongly disagree	Strongly agree	Strongly disagree
6060cc2bf9ba38d90b1a6f12	English	Vietnamese						English	Vietnamese			Currently use it, but occasionally	Used it occasionally in the past but have stopped	Used it occasionally in the past but have stopped	Never Used it	Never Used it	Currently use it, but occasionally	Never Used it	Currently use it heavily	Never Used it	Never Used it	Never Used it	Never Used it	Yes	Yes	Google Translate	Bing Translate					Spanish	es	MT with edit	about something funny that happened to you during a meeting.	En una reuniÃ³n que tuve hoy, conocÃ­ a un amigo que no habÃ­a visto en muchos aÃ±os. Cuando nos vimos, nos miramos hasta que estuvimos lo suficientemente cerca como para darnos la mano sin romper el contacto visual. Fue gracioso porque asÃ­ siempre nos saludÃ¡bamos en el pasado y era obvio que todavÃ­a se acordaban.	At a meeting I had today, I met a friend I hadn't seen for many years. When we saw each other, we looked at each other until we were close enough to shake hands without breaking eye contact. It was funny because that's how we always greeted each other in the past and it was obvious that they still remembered each other.	no	about a heated argument you recently had with a family member.	Tuve una discusiÃ³n intensa con mi hermana menor, que siempre sale a escondidas de la casa para visitar a su amiga. El tema es que sus razones siempre son frÃ­volas y en la economÃ­a actual no es bueno hacerlo cuando los precios de la gasolina estÃ¡n tan altos. Ella estÃ¡ pasando por una fase rebelde en la que se escapa cada vez que puede porque tiene una licencia de conducir. SolÃ­a ser muy inte…	I had an intense argument with my younger sister, who always sneaks out of the house to visit her friend. The thing is, their reasons are always frivolous and in today's economy it's not a good thing to do when gas prices are so high. She is going through a rebellious phase where she runs away whenever she can because she has a driver's license. She used to be very smart in school, but now she ha…	yes	P32	Great info	No, everything in the experiment worked smoothly.	MT_with_edit	Disagree	Agree	Somewhat disagree
60660870280f2b522cc3214b	English	Gujarati						English	Gujarati			Currently use it heavily	Currently use it, but occasionally	Currently use it heavily	Currently use it heavily	Currently use it, but occasionally	Currently use it heavily	Used it occasionally in the past but have stopped	Currently use it heavily	Currently use it heavily	Used it occasionally in the past but have stopped	Currently use it heavily	Never Used it	Yes	Yes	Google Translate						Hindi	hi	Only MT	about an unusal travel experience that you had.	à¤®à¥ˆà¤‚à¤¨à¥‡ à¤¹à¤¾à¤² à¤¹à¥€ à¤®à¥‡à¤‚ à¤­à¤¾à¤°à¤¤ à¤•à¤¾ à¤¦à¥Œà¤°à¤¾ à¤•à¤¿à¤¯à¤¾ à¤”à¤° à¤®à¥ˆà¤‚ à¤¬à¥€à¤®à¤¾à¤° à¤¨à¤¹à¥€à¤‚ à¤¹à¥à¤†à¥¤ à¤¯à¤¹ à¤…à¤¸à¤¾à¤®à¤¾à¤¨à¥à¤¯ à¤¥à¤¾à¥¤	I recently visited India and I didn't get sick. It was unusual.	yes	about a heated argument you recently had with a family member.	\nà¤®à¥‡à¤°à¥‡ à¤ªà¤¿à¤¤à¤¾ à¤”à¤° à¤®à¥ˆà¤‚ à¤‡à¤¸ à¤¬à¤¾à¤¤ à¤ªà¤° à¤¬à¤¹à¤¸ à¤®à¥‡à¤‚ à¤ªà¤¡à¤¼ à¤—à¤ à¤•à¤¿ à¤•à¥Œà¤¨ à¤²à¤‚à¤¬à¤¾ à¤¥à¤¾à¥¤	\nMy father and I got into an argument over who was taller.	yes	P187	Great info	The main language I spoke was not supported	only_MT	Agree	Somewhat agree	Somewhat disagree
6077afdfc5a87e629ae6fab1	English	Spanish						English	Spanish			Currently use it, but occasionally	Used it occasionally in the past but have stopped	Currently use it heavily	Currently use it, but occasionally	Used it heavily in the past but have stopped	Currently use it heavily	Never Used it	Currently use it heavily	Currently use it, but occasionally	Never Used it	Never Used it	Used it heavily in the past but have stopped	Yes	Yes	Google Translate						Spanish	es	Manual	about a bad retail experience you recently had.	Compre una camisa en el H&M, pero la trabajadora me iso muy tonta	"Bought a shirt at H&M, but the attendant was pretty dumb"	yes	explaining your opinion about a political controversy.	Pienso que Trump es el mejor canidad por este pais	"I think Trump is the better candidate for this country"	yes	P19	ok	No everything went smoothly	manual_translation	Disagree	Disagree	Disagree
607eafaf008af56a5a3ba462	English	Twi	Ga					English	Twi			Currently use it, but occasionally	Currently use it, but occasionally	Never Used it	Currently use it heavily	Never Used it	Currently use it heavily	Never Used it	Currently use it heavily	Used it occasionally in the past but have stopped	Never Used it	Currently use it, but occasionally	Never Used it	No	Yes	Google translate	Chrome Translator					korean	ko	Manual	about a bad retail experience you recently had.	"ë‚˜ëŠ” ì‹ë£Œí’ˆì„ ì‚¬ëŸ¬ ê°€ê²Œì— ê°”ë‹¤. ë¬¼ê±´ ê°’ì„ ì§€ë¶ˆí•˜ë ¤ê³ í–ˆì„ ë•Œ ì¹´ë“œë¥¼ ì§‘ì— ë‘ê³ ì™€ì„œ í˜„ê¸ˆì´ ì—†ë‹¤ëŠ” ê²ƒì„ ê¹¨ë‹¬ì•˜ìŠµë‹ˆë‹¤. ìƒí’ˆì„ ë°˜í’ˆí•´ì•¼ í–ˆìŠµë‹ˆë‹¤. ì°½í”¼í–ˆë‹¤."	"I went to a shop to buy some groceries. When I tried to pay for my goods, I realized I had left my card home and I had no cash on me. I had to return the goods. It was embarrassing."	yes	"explaining your opinion about a political controversy."	"ëŸ¬ì‹œì•„-ìš°í¬ë¼ì´ë‚˜ ì „ìŸ ë¬¸ì œëŠ” ì°¸ ì´ìƒí•œ ìƒí™©ìž…ë‹ˆë‹¤. ë‚˜ ê°™ì€ ì„œë¯¼ì˜ ê²½ìš° ëŸ¬ì‹œì•„ì— ë§žì„œ ì„œë°©ì˜ íŽ¸ì— ì„­ë‹ˆë‹¤. ì´ ëª¨ë“ ê³¼ì •ì—ì„œ ë¬´ê³ í•œ ì‹œë¯¼ë“¤ì´ ê³ í†µì„ ê²ªì„ ê²ƒì´ê¸° ë•Œë¬¸ìž…ë‹ˆë‹¤. ê·¸ëŸ¬ë‚˜ ë‚˜ëŠ” ë˜í•œ ì´ˆê°•ëŒ€êµ­ì¸ ëŸ¬ì‹œì•„ê°€ ìš°í¬ë¼ì´ë‚˜ê°€ ì„œë°©ì— í•©ë¥˜í•˜ëŠ” ê²ƒì„ í—ˆìš©í• ìˆ˜ ì—†ëŠ” ì´ìœ ë¥¼ ì´í•´í•©ë‹ˆë‹¤. íž˜ì´ ë…	"The Issue of the Russian- Ukraine war is such a weird situation. For commoners like me, I side with the west against Russia because innocent citizens are the ones to suffer throughout all this. However, I also understand why Russia as a super power cannot allow Ukraine to join the west. It is a power thing."	yes	P45	great info	No	manual_translation	Somewhat agree	Disagree	Somewhat agree
60819dd29a63569b48b584ea	English	Korean						English	Korean			Used it occasionally in the past but have stopped	Used it occasionally in the past but have stopped	Currently use it, but occasionally	Never Used it	Used it occasionally in the past but have stopped	Currently use it, but occasionally	Never Used it	Currently use it heavily	Used it occasionally in the past but have stopped	Currently use it, but occasionally	Currently use it heavily	Used it occasionally in the past but have stopped	Yes	Yes	google translator						Korean	ko	Manual	"about a funny situation where you were distracted by your mobile phone."	"ì—„ë§ˆëž‘ ì§„ì§€í•œ ì–˜ê¸°í•˜ëŠ”ë° ìžê¾¸ ë¬¸ìž ì˜¤ëŠ”ê±° ì‹ ê²½ì“°ë‹¤ê°€ í˜¼ë‚¨"	"I was having a serious talk with my mother but kept getting distracted by text messages and got in trouble. "	yes	"about a bad experience with an employer or teacher."	"ì¹œêµ¬ëž‘ ë’¤ì—ì„œ ë’·ë‹´í•˜ë‹¤ê°€ ì„ ìƒí•œí…Œ ê±¸ã„¹ã…£ã…"	"I was gossiping in the back with my friend and got caught by the teacher"	yes	P76	good	no	manual_translation	Agree	Neutral	Agree
6081a9318fee7d4e4e01ffdf	English	Spanish						English	Spanish			Never Used it	Currently use it heavily	Never Used it	Currently use it, but occasionally	Never Used it	Currently use it, but occasionally	Never Used it	Currently use it heavily	Never Used it	Used it occasionally in the past but have stopped	Never Used it	Used it heavily in the past but have stopped	Yes	Yes	Google Translate						Spanish	es	Only MT	about a funny situation where you were distracted by your mobile phone.	El otro dÃ­a, no pude dejar de reÃ­rme de la historia de mi esposa.	The other day, I couldn't stop laughing at my wife's story.	yes	about a heated argument you recently had with a family member.	No creerÃ­as la mierda del toro que mi papÃ¡ estaba tratando de hacerme creer. Â¡Ay Bendito!	You wouldn't believe the bull shit my dad was trying to make me believe. Oh blessed!	no	P138	Good info	I had no issues with the experiment.	only_MT	Agree	Neutral	Somewhat agree
608981c1be83df6a5452398e	English							English				Used it occasionally in the past but have stopped	Currently use it, but occasionally	Currently use it, but occasionally	Used it occasionally in the past but have stopped	Currently use it, but occasionally	Currently use it heavily	Never Used it	Currently use it, but occasionally	Used it occasionally in the past but have stopped	Never Used it	Used it occasionally in the past but have stopped	Used it occasionally in the past but have stopped	Yes	Yes	google						Spanish	es	MT with edit	about an unusal travel experience that you had.	Fui a un hotel y estaba lleno de cucarachas	I went to a hotel and it was full of cockroaches	yes	explaining your opinion about a political controversy.	Por favor en un lugar me fue mal con las instrucciones. Vota Trump 2024	Please in one place I went wrong with the instructions. Vote Trump 2024	yes	P130	Great info	everything was fine	MT_with_edit	Strongly disagree	Agree	Somewhat agree
608e875414e027cb3b277df1	English	Chinese						English	Chinese			Used it occasionally in the past but have stopped	Used it heavily in the past but have stopped	Currently use it, but occasionally	Used it occasionally in the past but have stopped	Currently use it heavily	Currently use it heavily	Never Used it	Currently use it, but occasionally	Currently use it, but occasionally	Never Used it	Used it occasionally in the past but have stopped	Currently use it, but occasionally	Yes	Yes	google	iphone translate	random ios app				Chinese	zh-CN	Manual	about a funny situation where you were distracted by your mobile phone.	æˆ‘æ­£åœ¨å’ŒæŸäººé—²é€›ï¼Œçªç„¶æˆ‘çš„æ‰‹æœºé—¹é’Ÿå“äº†ï¼Œè¿™å“åäº†æˆ‘ä»¬ï¼Œè®©æˆ‘æŠŠé¥®æ–™æ´’äº†	I was hanging out with someone and suddenly my phone's alarm went off, which scared us and caused me to spill my drink.	yes	about a heated argument you recently had with a family member.	æˆ‘å’Œæˆ‘çš„çˆ¶æ¯å‘ç”Ÿäº†äº‰æ‰§ï¼Œè¯´å¦‚æžœä»–ä»¬åšäº†åäº‹ï¼Œæˆ‘ä¸æƒ³è®©ä»–ä»¬æ‰“æˆ‘çš„çŒ«	I got into an argument with my parents about not wanting them to hit my cats if they do something bad.	yes	P124	Good info	No	manual_translation	Somewhat agree	Agree	Disagree
6091b418d1cddb4526a44543	English	German						English				Currently use it, but occasionally	Currently use it heavily	Currently use it heavily	Never Used it	Never Used it	Currently use it heavily	Never Used it	Currently use it, but occasionally	Never Used it	Used it occasionally in the past but have stopped	Never Used it	Never Used it	Yes	Yes	Google Translate						German	de	MT with edit	about a funny situation where you were distracted by your mobile phone.	Heute ist mir was lustiges und peinliches passiert. Ich war zu Fuss in der Stadt unterwegs und jemand hat mir einen Text geschickt. Ich habe das Handy aus der Tasche rausgeholt und wollte den Text lesen, habe allerdings nicht aufgepasst wo ich hinlaufe. Ploetzlich krachte es und ich war mit einer Muelltonne zusammengestossen.	Something funny and embarrassing happened to me today. I was walking around town and someone texted me. I took my phone out of my bag and wanted to read the text, but I didn't pay attention to where I was walking. Suddenly there was a bang and I collided with a garbage can.	yes	about a heated argument you recently had with a family member.	Ich habe mich letzte Woche mit meiner Mutter auseinandergesetzt. Sie wollte dass ich doch Sonntags auch in die Kirche gehe. Ich habe es ihr allerdings erklaert dass ich nie in die Kirche gehe und dass ich Atheist bin. Das hat sie wahnsinning aufgeregt und sie hat gesagt dass ich das besser fuer mich behalte.	I had a fight with my mother last week. She wanted me to go to church on Sundays too. However, I explained to her that I never go to church and that I am an atheist. That got her really upset and she said I'd better keep it to myself.	yes	P97	Great info	No, nothing went wrong	MT_with_edit	Disagree	Agree	Disagree
609559e38572a4f2142fac87	English	Spanish						English	Spanish			Currently use it, but occasionally	Never Used it	Used it occasionally in the past but have stopped	Currently use it heavily	Used it occasionally in the past but have stopped	Currently use it heavily	Never Used it	Currently use it, but occasionally	Never Used it	Never Used it	Used it occasionally in the past but have stopped	Currently use it, but occasionally	Yes	Yes	Google Translate						Spanish	es	MT with edit	about a bad retail experience you recently had.	odio irme a walmart, nunca encuentro lo que quiero. porque dicen que teneis todo si no lo teneis???	I hate going to walmart, I never find what I want. Why do you say you have everything if you don't have it???	yes	about a bad experience with an employer or teacher.	cuando era niÃ±a iba a un colegio privado, y todos los niÃ±os fueran muy crueles conmigo....pero cuando yo intentaba defendierme, el principal siempre me castigaba :(	when I was a girl I went to a private school, and all the children were very cruel to me... but when I tried to defend myself, the principal always punished me :(	yes	P100	Great info	No, aside from a single error consistent with my less-than-perfect grammar with the translation tool I think it went well.	MT_with_edit	Strongly disagree	Strongly agree	Strongly disagree
609cdc7e357ecdddef846f8f	English	Spanish	Hindi	Telugu				English	Spanish	Hindi		Currently use it heavily	Currently use it, but occasionally	Currently use it heavily	Used it heavily in the past but have stopped	Currently use it, but occasionally	Currently use it, but occasionally	Never Used it	Currently use it heavily	Currently use it, but occasionally	Currently use it, but occasionally	Currently use it heavily	Currently use it heavily	Yes	Yes	Google Translate						Hindi	hi	Only MT	about something funny that happened to you during a meeting.	à¤à¤• à¤¦à¤¿à¤¨ à¤®à¥ˆà¤‚ à¤à¤• à¤®à¥€à¤Ÿà¤¿à¤‚à¤— à¤®à¥‡à¤‚ à¤¬à¤¾à¤¤ à¤•à¤° à¤°à¤¹à¤¾ à¤¥à¤¾ à¤²à¥‡à¤•à¤¿à¤¨ à¤®à¥ˆà¤‚ à¤šà¥à¤ª à¤¥à¤¾	One day I was talking in a meeting but I was silent	no	explaining your opinion about a political controversy.	à¤®à¥à¤à¥‡ à¤²à¤—à¤¤à¤¾ à¤¹à¥ˆ à¤•à¤¿ à¤¸à¤­à¥€ à¤°à¤¾à¤œà¥à¤¯à¥‹à¤‚ à¤®à¥‡à¤‚ à¤¬à¤‚à¤¦à¥‚à¤• à¤¨à¤¿à¤¯à¤‚à¤¤à¥à¤°à¤£ à¤•à¥‡ à¤¨à¤¿à¤¯à¤® à¤¹à¥‹à¤¨à¥‡ à¤šà¤¾à¤¹à¤¿à¤	I think all states should have gun control rules	yes	P112	ok	No	only_MT	Strongly agree	Somewhat agree	Strongly agree
60a7c3e1e70934af63664a46	English	Spanish						English	Spanish			Currently use it, but occasionally	Currently use it, but occasionally	Currently use it heavily	Currently use it heavily	Currently use it heavily	Currently use it, but occasionally	Currently use it, but occasionally	Currently use it, but occasionally	Currently use it, but occasionally	Currently use it, but occasionally	Currently use it heavily	Currently use it, but occasionally	Yes	No							Spanish	es	Manual	"about something funny that happened to you during a meeting."	le diije a mi jefe, no saber ni papa de algo.	"i told my boss, i didnt know a potato about something"	yes	"explaining your opinion about a political controversy."	"mi o mo fun yin oo, e ma pa mi, buhari fe pa wa"	"i dont know anything about it, buhari wants to kill us "	yes	P44	ok	no nothing did	manual_translation	Somewhat agree	Neutral	Neutral
60ac66a8e1bf5a1c51fa864c	English	Spanish						English				Currently use it heavily	Currently use it heavily	Currently use it heavily	Currently use it heavily	Currently use it, but occasionally	Currently use it heavily	Currently use it, but occasionally	Currently use it, but occasionally	Currently use it, but occasionally	Currently use it, but occasionally	Currently use it heavily	Used it heavily in the past but have stopped	Yes	Yes	google translate						Spanish	es	MT with edit	about an unusal travel experience that you had.	viaje mucho en el pasado,sin embargo hace 2 aÃ±os realizar un viaje inolvidable en compaÃ±ia de mi esposa e hija,e pasaron muchas cosas gratas,conoci un familiar lejano que no sabia de el	I traveled a lot in the past, however 2 years ago I made an unforgettable trip in the company of my wife and daughter, and many pleasant things happened, I met a distant relative who did not know about him	yes	about a heated argument you recently had with a family member.	se estaba realizando una reunion familiar en casa,estaban invitados familiares de mi esposa,habia un sobrino de mi esposa muy mal educado y conteston,en esa ocacion lo reprendi fuertemente,sin el embargo no paraba de hablar,fue una situacion incomoda	a family reunion was taking place at home, my wife's relatives were invited, there was a very rude nephew of my wife and he answered, on that occasion I strongly reprimanded him, however he did not stop talking, it was an uncomfortable situation	yes	P15	would be interesting to see what changes they make in translated post	no, everything went very well	MT_with_edit	Somewhat disagree	Agree	Disagree
60ad344265fa9865ff45c0bf	English	Urdu						English				Currently use it heavily	Currently use it, but occasionally	Currently use it heavily	Currently use it heavily	Never Used it	Currently use it heavily	Never Used it	Currently use it heavily	Used it occasionally in the past but have stopped	Currently use it, but occasionally	Never Used it	Used it occasionally in the past but have stopped	Yes	Yes	Google translate.						Urdu	ur	MT with edit	about something funny that happened to you during a meeting.	Ù…ÛŒÚº Ø§ÛŒÚ© Ø¨Ø§Ø± Ù…ÛŒÙ¹Ù†Ú¯ Ù…ÛŒÚº Ø¯ÛŒØ± Ø³Û’ Ø¢ÛŒØ§ Ø§ÙˆØ± Ù…ÛŒØ±ÛŒ Ù¹ÛŒÙ… Ú©Û’ Ø¯ÛŒÚ¯Ø± Ù…Ù…Ø¨Ø±Ø§Ù† Ú†Ù†Ø¯ Ù…Ù†Ù¹ÙˆÚº Ú©Û’ Ù„ÛŒÛ’ Ù…Ø¬Ú¾Û’ ØºØµÛ’ Ø³Û’ Ø¯ÛŒÚ©Ú¾ØªÛ’ Ø±ÛÛ’ Ø§Ø³ Ù„ÛŒÛ’ Ù…ÛŒÚº Ú©Ù†Ø§Ø±Û’ Ù¾Ø± ØªÚ¾Ø§ØŒ Ù„ÛŒÚ©Ù† Ø¬Ø¨ Ù…ÛŒÚº Ø¨ÙˆÙ„Ù†Û’ ÛÛŒ ÙˆØ§Ù„Ø§ ØªÚ¾Ø§ ØªÙˆ Ø³Ø¨ ÛÙ†Ø³ Ù¾Ú‘Û’ Ø§ÙˆØ± Ú©ÛØ§ Ú©Û ÙˆÛ Ù…Ø°Ø§Ù‚ Ú©Ø± Ø±ÛÛ’ ÛÛŒÚº Ø§Ø³ Ù„ÛŒÛ’ ØªÙ†Ø§Ø¤ Ø¯ÙˆØ± ÛÙˆ Ú¯ÛŒØ§Û”	I once arrived late for a meeting and the other members of my team stared at me angrily for a few minutes so I was on the edge, but when I was about to speak everyone laughed and said they were joking. So the tension went away.	yes	about a bad experience with an employer or teacher.	Ù…ÛŒÚº ÛØ§Ø¦ÛŒ Ø§Ø³Ú©ÙˆÙ„ Ù…ÛŒÚº Ø§Ù¾Ù†ÛŒ Ø§Ù†Ú¯Ù„Ø´ Ú©Ù„Ø§Ø³ Ù…ÛŒÚº A Ú¯Ø±ÛŒÚˆ Ú©Û’ Ù‚Ø±ÛŒØ¨ ØªÚ¾Ø§ (0.2 Ù¾ÙˆØ§Ø¦Ù†Ù¹Ø³ Ø¯ÙˆØ±) Ø§ÙˆØ± ÛŒÛ Ù¹ÛŒÚ†Ø± Ù…Ø¬Ú¾Û’ Ø¨Ø·ÙˆØ± Ø§Ù†Ø³Ù¹Ø±Ú©Ù¹Ø± Ù¾Ø³Ù†Ø¯ ØªÚ¾Ø§ Ù…ÛŒØ±ÛŒ Ù¾Ú‘Ú¾Ø§Ø¦ÛŒ Ù…ÛŒÚº Ø¨ÛØª Ù…Ø¯Ø¯Ú¯Ø§Ø± ØªÚ¾Ø§Û” Ù„ÛØ°Ø§ Ù…ÛŒÚº Ù†Û’ Ø§Ø³ Ø³Û’ Ù¾ÙˆÚ†Ú¾Ø§ Ú©Û Ú©ÛŒØ§ ÛŒÛ Ù¹Ú¾ÛŒÚ© ÛÛ’ Ø§Ú¯Ø± ÙˆÛ Ù…ÛŒØ±Û’ Ú¯Ø±ÛŒÚˆ Ú©Ùˆ Ø§Ù† 0.2 Ù¾ÙˆØ§Ø¦Ù†Ù¹Ø³ Ú©Ùˆ Ø¨…	I was close to A grade in my English class in high school (0.2 points away) and this teacher I liked as an instructor was very helpful in my studies. So I asked her if she could raise my grade by 0.2 points. Her answer was something I had never seen before because she was angry at me for asking and gave me a lecture on why she wouldn't do it. After answering, I left the classroom and did not spea…	yes	P40	good	Nothing went wrong.	only_MT	Somewhat disagree	Somewhat disagree	Neutral
60aed7ba3afc3974acad86d3	English	Mandarin Chinese						English	Mandarin Chinese			Currently use it, but occasionally	Currently use it heavily	Currently use it heavily	Currently use it, but occasionally	Currently use it heavily	Currently use it heavily	Currently use it, but occasionally	Currently use it heavily	Currently use it heavily	Never Used it	Used it occasionally in the past but have stopped	Used it occasionally in the past but have stopped	Yes	Yes	Google translate	Microsoft Translator					Chinese	zh-CN	MT with edit	about something funny that happened to you during a meeting.	åœ¨æˆ‘ä¸Žæˆ‘çš„å·¥ä¸šå·¥ç¨‹å°ç»„åœ¨ä¸€ä¸ªåä¸º IE 332 çš„è¯¾ç¨‹ä¸­â€‹â€‹å¼€ä¼šæ—¶ï¼Œå‘ç”Ÿåœ¨æˆ‘èº«ä¸Šçš„ä¸€ä»¶æœ‰è¶£çš„äº‹æƒ…æ˜¯åœ¨é¡¹ç›®çŠ¶æ€æ›´æ–°ä¼šè®®ä¸Šï¼Œæˆ‘ä»¬éƒ½åœ¨è®¨è®ºæˆ‘ä»¬åœ¨æœºå™¨å­¦ä¹ åº”ç”¨ç¨‹åºä¸Šçš„è¿›å±•ï¼Œè€Œåœ¨ä¸­é—´åœ¨ä¼šè®®ä¸­ï¼Œæˆ‘ä»¬æˆå‘˜çš„ä¸€ä½å®¤å‹åœ¨çŽ©æ¸¸æˆæ—¶å¤§å£°å°–å«ï¼Œè®©æ•´ä¸ªå›¢é˜Ÿéƒ½å› çªå¦‚å…¶æ¥çš„å™ªéŸ³è€Œå¤§ç¬‘ã€‚å°¤å…¶æ˜¯ï¼Œè®©æ´»åŠ¨æ›´æœ‰è¶£ç…	One of the interesting things that happened to me when I was in a meeting with my industrial engineering group in a class called IE 332 was during the project status update meeting where we were both discussing our work in machine learning applications progress on the board, and in the middle of a meeting, one of our members' roommates screamed loudly while playing a game, making the whole team l…	yes	about a bad experience with an employer or teacher.	æˆ‘å’ŒåŠ©æ•™çš„ä¸€æ¬¡ç³Ÿç³•ç»åŽ†æ˜¯åœ¨æˆ‘å¤§å­¦äºŒå¹´çº§çš„æ—¶å€™ï¼Œå½“æ—¶æˆ‘æ­£åœ¨ä¸Šç‰©ç†ç”µç£å­¦å’Œç”µå­¦è¯¾ç¨‹ï¼Œå½“æˆ‘åˆ°æ—©ä¸Šçš„å®žéªŒå®¤è¿Ÿåˆ°å‡ åˆ†é’Ÿæ—¶ï¼Œæˆ‘è¢«åŠ©æ•™å¤§å¼å¤§å«ï¼ŒåŽŸå› æ˜¯æœ‰å†²çªçš„åŒ»ç–—é¢„çº¦ã€‚æˆ‘ä¸ºè¿Ÿåˆ°å‘ä»–é“æ­‰ï¼Œæ˜¯æˆ‘æ²¡å‡†æ—¶çš„é”™ï¼Œä»–å›žç­”è¯´å¦‚æžœæˆ‘ä¸‹æ¬¡å†è¿Ÿåˆ°æˆ‘çš„å®žéªŒå®¤ï¼Œä»–ä¼šæ‰£åˆ†ã€‚	One bad experience I had with my TA was during my sophomore year of college when I was taking a course in physical electromagnetism and electricity and when I was a few minutes late to my morning lab, I was yelled at by the TA for having Conflicting medical appointments. I apologized to him for being late, it was my fault for not being on time, and he replied that he would deduct points if I was …	yes	P153	Great info	N/A	MT_with_edit	Disagree	Agree	Disagree
60ba36a23cc2c56419ae0f1e	English							English				Currently use it, but occasionally	Used it heavily in the past but have stopped	Currently use it heavily	Currently use it heavily	Currently use it heavily	Currently use it heavily	Never Used it	Currently use it, but occasionally	Never Used it	Currently use it, but occasionally	Never Used it	Never Used it	Yes	Yes	Google translate	itranslate					Spanish	es	MT with edit	about something funny that happened to you during a meeting.	Hoy durante una reunion, se me cayo mi cafe en frente de todos!	Today during a meeting, I dropped my coffee in front of everyone!	yes	about a heated argument you recently had with a family member.	Pelee con mi hermano por el caro, porque me tocaba a mi tenerlo	I fought with my brother for the car, because it was my turn to have it	no	P56	good	no	MT_with_edit	Disagree	Somewhat agree	Somewhat disagree
60be1e056f39c387c4f02308	English	Pidgin English						English				Currently use it, but occasionally	Currently use it, but occasionally	Currently use it, but occasionally	Currently use it heavily	Never Used it	Currently use it, but occasionally	Used it occasionally in the past but have stopped	Never Used it	Currently use it, but occasionally	Never Used it	Currently use it, but occasionally	Never Used it	Yes	Yes	Google.						Yoruba	yo	Only MT	about a funny situation where you were distracted by your mobile phone.	Mo padanu kaadi id mi nigbakan ati pe mo fáº¹ pe mo le táº¹ áº¹ ju ki n wa	I lost my id card once and I wish I could type it more than I was looking for	no	about a heated argument you recently had with a family member.	Ni ipade idile, gbogbo eniyan ni o fáº¹ ki a gbá» ati arakunrin ti o pariwo le dabi áº¹ni pe o á¹£e awá»n aaye ti o tá» ati pe mo korira iyáº¹n	At the family meeting, everyone wanted to be heard and the shouting brother might seem to be doing the right thing and I hate that	yes	P119	Great info	Had to go with Yoruba when I did not find Pidgin in the drop down... I would have loved to translate Pidgin English rather than Yoruba as my Yoruba isn't really sound. Just noticed that the next question talks about editing the translation generated, but I didn't notice that as an option on the interface.	only_MT	Agree	Somewhat agree	Somewhat agree
60bf12324c4452f7b77daa6d	Mandarin							English				Never Used it	Currently use it heavily	Used it heavily in the past but have stopped	Used it heavily in the past but have stopped	Never Used it	Currently use it heavily	Never Used it	Currently use it heavily	Currently use it, but occasionally	Used it heavily in the past but have stopped	Never Used it	Used it occasionally in the past but have stopped	Yes	Yes	Google translate						French	fr	Only MT	about something funny that happened to you during a meeting.	Aujourd'hui, notre collÃ¨gue a renversÃ© du cafÃ© sur sa chemise et a dÃ» faire sa prÃ©sentation torse nu.	Today our colleague spilled coffee on his shirt and had to give his presentation shirtless.	yes	about a heated argument you recently had with a family member.	La semaine derniÃ¨re, mon frÃ¨re et moi nous sommes disputÃ©s pour savoir qui devait acheter les produits d'Ã©picerie.	Last week, my brother and I argued over who should buy the groceries.	yes	P94	Good	none	manual_translation	Neutral	Neutral	Somewhat agree
60d105cd7e245d9c98c756ab	English							English				Used it occasionally in the past but have stopped	Never Used it	Never Used it	Currently use it heavily	Never Used it	Currently use it heavily	Never Used it	Currently use it, but occasionally	Currently use it, but occasionally	Currently use it, but occasionally	Never Used it	Never Used it	I am not sure	Yes	google						Yoruba	yo	MT with edit	about something funny that happened to you during a meeting.	Nigba ti mo lo si ibise. Mi o wo buba mi daada. Mo wo buba mi so di. Aro kutu kutu ni. Amon ore mi n wo mi. Nigba ti iel mo, awon ore mi wo mi nwo ba n rerin. Mo bi won idi ti won se n rerin. Nwo so fun mi pe mo wo buba mi lodi. Erin fe e pa mi.	When I went to work. I do not look at my crop properly. I looked at my crop. It's too early. My friend Amon is watching me. When I know, my friends see me laughing. I asked them why they were laughing. You tell me I look at my crop. Erin wants to kill me.	no	about a bad experience with an employer or teacher.	Mo ji la a ro. Mo murs fun ibise. Mo we, mo je un, mo wo so. Nigba ti mo jade lati ninule mi, mi or i oko mi. Awon ole ti ji oko mi. Eyi faa ti mo pe de ibi se mi. Ni to ri naa ise mi wa po jaburata.	I woke up thinking. I murs for work. Mo we, mo je un, mo wo so. When I moved out of my house, I was driving my car. My car was stolen by thieves. That is why I am called here. As a result, my work was very limited.	no	P118	Good info	no	MT_with_edit	Somewhat disagree	Somewhat agree	Somewhat disagree
60d9faa609c8dcb9e5e05481	English	Spanish						English				Used it occasionally in the past but have stopped	Used it heavily in the past but have stopped	Never Used it	Currently use it, but occasionally	Never Used it	Currently use it heavily	Never Used it	Currently use it, but occasionally	Never Used it	Never Used it	Never Used it	Never Used it	I am not sure	I am not sure							Spanish	es	Manual	about an unusal travel experience that you had.	Hice un viaje a Holanda y me recibiÃ³ gente con zuecos.\n	I took a trip to Holland and was greeted by people in clogs.	yes	about a heated argument you recently had with a family member.	DiscutÃ­ con mi hermano sobre la hora en que se suponÃ­a que Ã­bamos a ir al cine y se puso muy caliente.\n	I argued with my brother about the time we were supposed to go to the movies and it got very heated.	yes	P180	Good	No	manual_translation	Disagree	Neutral	Neutral
60e5f1ae185cdcabc12f7d03	English	Haitian Creole						English	Haitian Creole			Currently use it, but occasionally	Never Used it	Currently use it heavily	Currently use it, but occasionally	Currently use it, but occasionally	Currently use it, but occasionally	Never Used it	Never Used it	Never Used it	Currently use it, but occasionally	Currently use it heavily	Never Used it	Yes	Yes	twitter	pinterest	instagram	tiktok			Haitian Creole	ht	Manual	about an unusal travel experience that you had.	lÃ¨ mwen te vwayaje nan New York mwen te pran yon taksi ak chofÃ¨ a te etranj. li te mande m 'pou nimewo mwen ak si mwen te gen timoun.	when i was traveling to new york i took a taxi and the driver was weird. he asked me for my number and if I had any kids.	yes	about a heated argument you recently had with a family member.	kouzen m a avÃ¨ m t ap diskite sou kiyÃ¨s ki ta dwe pran tranch ki sot pase a epi l rele m grÃ¨s	my cousin and i were arguing about who should get the last slice of pizza and she called me fat	yes	P177	Good	no everything went smoothly	MT_with_edit	Somewhat agree	Agree	Disagree
60e8b06bfb1c78d450ae9f79	English							English				Currently use it, but occasionally	Currently use it, but occasionally	Currently use it heavily	Currently use it heavily	Currently use it, but occasionally	Currently use it heavily	Currently use it, but occasionally	Currently use it, but occasionally	Currently use it, but occasionally	Used it heavily in the past but have stopped	Currently use it, but occasionally	Used it occasionally in the past but have stopped	Yes	Yes	google						Spanish	es	Manual	"about a funny situation where you were distracted by your mobile phone."	"mi esposo estaba ocupado hablando conmigo pero estaba viendo algunos memes locos en mi whatapp"	"My spouse was busy talking to me but I was watching some crazy memes in my WhatsApp."	yes	"about a bad experience with an employer or teacher."	"una vez tuvimos un malentendido con mi jefe sobre la presentaciÃ³n tardÃ­a del proyecto semanal, esto casi rompe la confianza y a punto de perder el trabajo."	"once we had a some misunderstanding with my boss about late submission of weekly project, this almost break the trust and about to lose the job."	yes	P29	Great info	No	only_MT	Somewhat agree	Somewhat disagree	Somewhat agree
60e8b06bfb1c78d450ae9f79	English							English				Currently use it, but occasionally	Currently use it, but occasionally	Currently use it heavily	Currently use it heavily	Currently use it, but occasionally	Currently use it heavily	Currently use it, but occasionally	Currently use it, but occasionally	Currently use it, but occasionally	Used it heavily in the past but have stopped	Currently use it, but occasionally	Used it occasionally in the past but have stopped	Yes	Yes	google						Spanish	es	Manual	about a funny situation where you were distracted by your mobile phone.	mi esposo estaba ocupado hablando conmigo pero estaba viendo algunos memes locos en mi whatapp	My spouse was busy talking to me but I was watching some crazy memes in my WhatsApp.	yes	about a bad experience with an employer or teacher.	una vez tuvimos un malentendido con mi jefe sobre la presentaciÃ³n tardÃ­a del proyecto semanal, esto casi rompe la confianza y a punto de perder el trabajo.	once we had a some misunderstanding with my boss about late submission of weekly project, this almost break the trust and about to lose the job.	yes	P13	language used regularly: swahili, but wrote post in spanish. Is it because Swahili is not in lanugage list?	No	only_MT	Somewhat agree	Somewhat disagree	Somewhat agree
60ea0ad4d1fbe4e3ea2c012a	English	Spanish						English				Currently use it heavily	Currently use it, but occasionally	Currently use it, but occasionally	Never Used it	Currently use it, but occasionally	Currently use it heavily	Never Used it	Currently use it heavily	Never Used it	Used it occasionally in the past but have stopped	Currently use it, but occasionally	Used it occasionally in the past but have stopped	Yes	Yes	Twitter	Facebook					Spanish	es	Manual	about an unusal travel experience that you had.	\nRecuerdo una vez que salÃ­\na Los Ãngeles y me encuentro con un ex, digamos que fue incÃ³modo.	I remember one time I went out \nto Los Angeles and I bump into an ex, lets just say it was awkward.	yes	explaining your opinion about a political controversy.	\nCreo que los republicanos son algunas de las personas mÃ¡s estÃºpidas, indiferentes y egoÃ­stas que viven actualmente en los Estados Unidos, simplemente basura.	I think Republicans are some of the most stupidest, uncaring, selfish people that live in the United States currently, just garbage people.	yes	P146	Great info	No	manual_translation	Somewhat disagree	Neutral	Neutral
60f43c3a0fd9723feba1af38	English	French	Polish					English	French			Currently use it, but occasionally	Used it occasionally in the past but have stopped	Currently use it, but occasionally	Never Used it	Never Used it	Currently use it, but occasionally	Never Used it	Currently use it, but occasionally	Currently use it, but occasionally	Never Used it	Never Used it	Never Used it	I am not sure	Yes	Microsoft Translator	ITranslate					French	fr	MT with edit	about an unusal travel experience that you had.	Je viens dâ€™arriver dans les Ã®les GalÃ¡pagos. Quelles merveilles paysages. La nature ici est vraiment diffÃ©rent que celles de la France. J.ai hÃ¢te de dÃ©couvrir tous les animaux et d.Ãªtre un avec la nature.	I just arrived in the GalÃ¡pagos Islands. What marvelous landscapes. Nature here is really different than that in France. I can't wait to discover all the animals and to be one with nature.	yes	about a heated argument you recently had with a family member.	Je viens de me disputer avec un de mes cousin qui crois toutes la propagande du government sur le virus Chinois. Je lui ai dit que dans la vie il faut utiliser le cerveau que Dieu tâ€™a donner est pas croire Ã tous les mensonges que lit sur les site social. Lâ€™heure est venue de se rÃ©veiller.	I just had a fight with a cousin of mine who believes all the government propaganda about the Chinese virus. I told him that in life you have to use the brain that God gave you and not believe all the lies you read on social sites. The time has come to wake up.	yes	P85	Good info	Everything went well. Very impressed with the translation.	MT_with_edit	Disagree	Agree	Disagree
60f43c3a0fd9723feba1af38	English	French	Polish					English	French			Currently use it, but occasionally	Used it occasionally in the past but have stopped	Currently use it, but occasionally	Never Used it	Never Used it	Currently use it, but occasionally	Never Used it	Currently use it, but occasionally	Currently use it, but occasionally	Never Used it	Never Used it	Never Used it	Yes	Yes	Google Translate	Microsoft Translator	iTranslate				French	fr	MT with edit	about an unusal travel experience that you had.	Je viens dâ€™arriver dans les Ã®les GalÃ¡pagos. Quelles merveilles paysages. La nature ici est vraiment diffÃ©rent que celles de la France. J.ai hÃ¢te de dÃ©couvrir tous les animaux et d.Ãªtre un avec la nature.	I just arrived in the GalÃ¡pagos Islands. What marvelous landscapes. Nature here is really different than that in France. I can't wait to discover all the animals and to be one with nature.	yes	about a heated argument you recently had with a family member.	Je viens de me disputer avec un de mes cousin qui crois toutes la propagande du government sur le virus Chinois. Je lui ai dit que dans la vie il faut utiliser le cerveau que Dieu tâ€™a donner est pas croire Ã tous les mensonges que lit sur les site social. Lâ€™heure est venue de se rÃ©veiller.	I just had a fight with a cousin of mine who believes all the government propaganda about the Chinese virus. I told him that in life you have to use the brain that God gave you and not believe all the lies you read on social sites. The time has come to wake up.	yes	P85	Good info	Everything went well. Very impressed with the translation.	MT_with_edit	Disagree	Agree	Disagree
60fcbc618cbdbb9771e49ec7	English	French	Haitian creole					English				Currently use it, but occasionally	Currently use it, but occasionally	Currently use it heavily	Currently use it heavily	Currently use it, but occasionally	Currently use it, but occasionally	Never Used it	Never Used it	Currently use it, but occasionally	Currently use it heavily	Currently use it heavily	Used it occasionally in the past but have stopped	Yes	Yes	Facebook	WhatsApp					French	fr	Only MT	about something funny that happened to you during a meeting.	J'ai pete pendent un reunion. J'etais tres tres tres gene	I farted during a meeting. I was very very very embarrassed	yes	about a heated argument you recently had with a family member.	Mon frere est tellement stupide. Il a toujour une replique a dire.	My brother is so stupid. He always has a line to say.	yes	P182	Good	Nothing went wrong	only_MT	Agree	Somewhat agree	Somewhat agree
60fd56db5fe37ebeca00bc83	English	Spanish						English				Used it occasionally in the past but have stopped	Used it occasionally in the past but have stopped	Currently use it heavily	Used it occasionally in the past but have stopped	Used it heavily in the past but have stopped	Currently use it heavily	Never Used it	Never Used it	Used it occasionally in the past but have stopped	Used it occasionally in the past but have stopped	Currently use it heavily	Used it occasionally in the past but have stopped	Yes	Yes	google translate						Spanish	es	Only MT	about a bad retail experience you recently had.	Estuve en una tienda el otro dÃ­a y el trabajador fue muy grosero. No podÃ­a creer que ella era muy asquerosa.	I was in a store the other day and the worker was very rude. I couldn't believe that she was so gross.	yes	explaining your opinion about a political controversy.	Creo en el calentamiento global. Y tenemos que cambiar nuestras formas si queremos salvar el planeta. Debemos reciclar y conservar.	I believe in global warming. And we have to change our ways if we want to save the planet. We must recycle and conserve.	yes	P141	Great info	No	MT_with_edit	Neutral	Somewhat agree	Neutral
60fd60e7587e4f2e860338b4	English	Hebrew						English	Hebrew			Currently use it, but occasionally	Currently use it, but occasionally	Currently use it, but occasionally	Currently use it heavily	Currently use it heavily	Used it occasionally in the past but have stopped	Never Used it	Currently use it, but occasionally	Currently use it, but occasionally	Never Used it	Currently use it heavily	Used it heavily in the past but have stopped	Yes	Yes	Google Translate						Hebrew	iw	MT with edit	about something funny that happened to you during a meeting.	×”×™×•× ×‘×¤×’×™×©×” ×©×œ×™, ×—×‘×¨ ×©×œ×™ ×©××œ ×× ×× ×—×• ×¦×¨×™×›×™× ×œ×¡×™×™× ×¢×œ ×”×›×œ ×ª×¤×§×™×“. ×—×‘×¨ ××—×¨ ××ž×¨ ×œ×• ×©××™ ××¤×©×¨ ×œ×¢×©×•×ª ××ª ×–×”, ×›×™ ×–×” ×ª×¤×§×™×“ ×©×œ ×©× ×” ×œ× ×©×œ ×©×‘×•×¢!	Today at my meeting, a friend of mine asked if we should finish the whole job. Another friend told him it could not be done, because it was a job for a year not for a week!	yes	explaining your opinion about a political controversy.	×× ×™ ×œ× ×™×•×“×¢×ª ×”×›×œ ×¢×œ ×”×§× ×¡×˜ ×‘×™×©×¨××œ, ××‘×œ ×× ×™ ×™×•×“×¢×ª ×©× ×¤×ª×œ×™ ×¦×¨×™×š ×œ×§×‘×œ ××ª ×”×¨×•×‘ ×‘×§×¨×•×‘	I do not know everything about Kanest in Israel, but I know that Naftali nee get the majority soon	yes	P157	Great info	no	MT_with_edit	Strongly disagree	Strongly agree	Strongly disagree
60fd8b1c25fe10912980d749	English	Spanish						English				Used it occasionally in the past but have stopped	Used it occasionally in the past but have stopped	Currently use it, but occasionally	Currently use it, but occasionally	Currently use it, but occasionally	Used it heavily in the past but have stopped	Never Used it	Currently use it, but occasionally	Used it occasionally in the past but have stopped	Used it occasionally in the past but have stopped	Currently use it, but occasionally	Never Used it	Yes	Yes	Google Translate						Spanish	es	Manual	about something funny that happened to you during a meeting.	Algo me cayo en mi cabeza.	Something fell on my head.	yes	about a heated argument you recently had with a family member.	Ella me insulto.	She insulted me.	yes	P121	ok	No	only_MT	Somewhat disagree	Somewhat agree	Neutral
60fdb8bb2e894d8d43b04c7b	English	Spanish						English				Currently use it, but occasionally	Currently use it, but occasionally	Currently use it heavily	Never Used it	Used it heavily in the past but have stopped	Currently use it, but occasionally	Never Used it	Never Used it	Currently use it, but occasionally	Currently use it, but occasionally	Currently use it heavily	Used it heavily in the past but have stopped	Yes	Yes	Google translate	Instagram					Spanish	es	Manual	"about a bad retail experience you recently had."	"No me gusta cuando los trabajadores de la tienda se quedan con tigo cuando estas tratando de mirar cosas en la tienda, de verda me enfada bastante!"	"I don't like it when the store workers stay with you when you are trying to look at things inside the store, truthfully it annoys me a lot!"	yes	"about a heated argument you recently had with a family member."	"Esque mi hermana quiere conocer mas de la vida, tener mas libertard y tomar sus propio decisiones. Yo la entiendo pero a mis papas, especialmente mi mama, lo toma bien personalmente, como si mi hermana ya no la quiere y no quiere pasar tiempo con ella!"	"It's just that my sister wants more life experiences, to have more freedom and make her own decisions. I understand her but my parents, especially my mom, takes it really personally, as if my sister doesn't lover her anymore or doesn't want to spend time with her!"	yes	P57	good	Everything went well.	MT_with_edit	Disagree	Agree	Somewhat agree
60fdd91a1ede7111c86df9f0	English	Tagalog						English				Used it occasionally in the past but have stopped	Currently use it, but occasionally	Currently use it heavily	Never Used it	Used it occasionally in the past but have stopped	Currently use it heavily	Never Used it	Currently use it, but occasionally	Currently use it, but occasionally	Currently use it heavily	Currently use it heavily	Used it occasionally in the past but have stopped	Yes	Yes	Google Translate						Tagalog	tl	MT with edit	about something funny that happened to you during a meeting.	Nakalimutan ko kumain bago ang meeting namin. Kaya yung tiyan ko nag-ingay habang nagkwekwento yung boss ko.	I forgot to eat before our meeting. So my stomach rumbled while my boss was talking.	yes	explaining your opinion about a political controversy.	Sa tinging ko, dapat tumulong ang gobyerno sa mga pamilya na walang pera sa pamamagitan ng mga serbisyong panlipunan.	In my opinion, the government should help families without money through social services.	yes	P186	Great info	No	MT_with_edit	Disagree	Neutral	Disagree
60fddeb6dfaa94f6424e0916	English	Spanish						English				Currently use it, but occasionally	Currently use it, but occasionally	Currently use it heavily	Never Used it	Currently use it, but occasionally	Currently use it, but occasionally	Never Used it	Currently use it, but occasionally	Currently use it heavily	Used it occasionally in the past but have stopped	Currently use it heavily	Used it occasionally in the past but have stopped	Yes	Yes	Google Translate	SpanishDict					Spanish	es	Manual	about an unusal travel experience that you had.	El aÃ±o pasado, yo fui a Hawaii con mi familia y dos amigos. En los primeros dÃ­as, la vacaciÃ³n fue muy divertida. Yo hice surf con mi amigas Abby y Haley, y nosotras relajaron en la playa for muchas horas cada dÃ­a. Pero en viernes, un evento muy extraÃ±o ocurriÃ³: mi familia y yo fueron a una playa famosa en Hawaii, pero toda la arena fue negro en color. Nadie sÃ© que fue la razÃ³n, y nosotros…	Last year, I went to Hawaii with my family and two friends. In the first few days, the vacation was a lot of fun. I surfed with my friends Abby and Haley, and we relaxed on the beach for many hours each day. But on Friday, a very strange event occurred: my family and I went to a famous beach in Hawaii, but all the sand was black in color. Nobody knows what the reason was, and we decided to go to …	yes	about a heated argument you recently had with a family member.	Me encanta hablar con mi familia despuÃ©s de la escuela, o antes de la cena en la cocina. Me gusta pasar tiempo con mi hermana especialmente, nosotras tÃ­picamente hablar sobre nuestra vidas en mi dormitorio cada noche antes de dormir. Pero ayer, mi hermana fue muy fastidiosa porque ella hablÃ³ mucho sobre mis problemas en la escuela, particularmente en la clase de matemÃ¡ticas. No me gusta habla…	I love talking with my family after school, or before dinner in the kitchen. I like spending time with my sister especially, we typically talk about our lives in my bedroom every night before bed. But yesterday, my sister was very annoying because she talked a lot about my problems at school, particularly in math class. I don't like to talk about my grades, but she didn't listen to me.	yes	P173	Great info	No	MT_with_edit	Disagree	Strongly agree	Strongly disagree
60fe2fa9e4d5ab46d2634bd4	English	Mandarin Chinese						English	Mandarin Chinese			Currently use it, but occasionally	Currently use it, but occasionally	Currently use it heavily	Used it occasionally in the past but have stopped	Currently use it, but occasionally	Currently use it heavily	Used it occasionally in the past but have stopped	Never Used it	Currently use it, but occasionally	Used it heavily in the past but have stopped	Currently use it heavily	Used it heavily in the past but have stopped	Yes	Yes	Google Translate						Chinese	zh-TW	Only MT	about a funny situation where you were distracted by your mobile phone.	æˆ‘ä»Šå¤©èµ°åœ¨è¡—ä¸Šçš„æ™‚å€™æ”¶åˆ°ä¸€å°ç°¡è¨Šï¼Œæ‰€ä»¥é‚Šçœ‹é‚Šèµ°ã€‚æˆ‘ç°¡è¨Šç™¼å®Œä¹‹å¾Œæ‰ç™¼ç¾æˆ‘èµ°éŒ¯æ–¹å‘äº†ï¼	I got a text message while walking down the street today, so I watched as I walked. Only after I finished texting did I realize that I was going in the wrong direction!	yes	about a bad experience with an employer or teacher.	æˆ‘è¨˜å¾—æˆ‘ç‰¹åˆ¥è¨ŽåŽ­æˆ‘å°å­¸çš„è—è¡“è€å¸«ã€‚å¥¹åˆå…‡åˆæ²’è€æ€§ï¼ŒçœŸæ˜¯è®“æˆ‘å’Œå…¨ç­åŒå­¸éƒ½è¨ŽåŽ­åŽ»ä¸Šèª²ã€‚	I remember I especially hated the art teacher in my elementary school. She was fierce and impatient, which really made me and the whole class hate going to class.	yes	P50	good	No	only_MT	Somewhat agree	Agree	Agree
60fe38317cb19f2601f75e05	English							English				Used it occasionally in the past but have stopped	Used it occasionally in the past but have stopped	Used it occasionally in the past but have stopped	Never Used it	Used it occasionally in the past but have stopped	Currently use it heavily	Never Used it	Used it occasionally in the past but have stopped	Used it occasionally in the past but have stopped	Used it occasionally in the past but have stopped	Currently use it heavily	Used it heavily in the past but have stopped	No	Yes	google translate						German		Manual	about an unusal travel experience that you had.	"Sie benutzten Klebeband, um das Flugzeug zu reparieren"	"they used duct tape to fix the airplane"	yes	"explaining your opinion about a political controversy."	"kein Krieg bitte\n"	"no war please"	yes	P6	ok	went smoothly	manual_translation	Strongly disagree	Somewhat agree	Somewhat disagree
60feeb8629c33fa1c661b050	English	Spanish	Mandarin chinese					English				Never Used it	Used it occasionally in the past but have stopped	Currently use it heavily	Never Used it	Currently use it heavily	Used it heavily in the past but have stopped	Never Used it	Used it occasionally in the past but have stopped	Never Used it	Currently use it, but occasionally	Currently use it heavily	Never Used it	I am not sure	Yes	Google translate						Spanish	es	Only MT	about an unusal travel experience that you had.	Dios mÃ­o, no puedo creer que perdÃ­ mis llaves en medio del desierto de Anza-Borrego. Realmente pensÃ© que iba a morir porque no habÃ­a nadie cerca y podrÃ­a haberse perdido en cualquier lugar dentro de la caminata de dos millas :(	My God, I can't believe I lost my keys in the middle of the Anza-Borrego desert. I really thought he was going to die because no one was around and he could have gotten lost anywhere within the two mile walk :(	yes	explaining your opinion about a political controversy.	El proyecto de ley Don't Say Gay que se aprobÃ³ en Florida es un ataque directo a la vida de millones de estadounidenses y no es justo marginar a un grupo por nada, especialmente algo tan arbitrario como su preferencia sexual.	The Don't Say Gay bill passed in Florida is a direct attack on the lives of millions of Americans and it is not fair to marginalize a group for anything, especially something as arbitrary as their sexual preference.	yes	P147	Great info	nope! it went smoothly	only_MT	Agree	Neutral	Somewhat agree
60ff1153b0089cb223a4cf44	English	Vietnamese						English	Vietnamese			Currently use it heavily	Currently use it, but occasionally	Currently use it heavily	Used it occasionally in the past but have stopped	Currently use it heavily	Currently use it heavily	Never Used it	Currently use it, but occasionally	Currently use it, but occasionally	Currently use it, but occasionally	Currently use it heavily	Used it heavily in the past but have stopped	Yes	Yes	Google Translate						Vietnamese	vi	Manual	about an unusal travel experience that you had.	Má»™t tráº£i nghiá»‡m du lá»‹ch khÃ¡c thÆ°á»ng mÃ tÃ´i Ä‘Ã£ cÃ³ lÃ láº§n Ä‘áº§u tiÃªn tÃ´i Ä‘i ra khá»i Ä‘áº¥t nÆ°á»›c. TÃ´i Ä‘Ã£ pháº£i nghá»‰ ráº¥t nhiá»u láº§n vÃ khi tÃ´i Ä‘áº¿n sÃ¢n bay, nÃ³ khÃ¡c nhiá»u so vá»›i á»Ÿ Hoa Ká»³. Äáº¿n Mexico, chÃºng tÃ´i pháº£i lÃ m thá»§ tá»¥c vá»›i sÃ¢n bay vÃ Ä‘áº¿n háº£i quan Ä‘á»ƒ kiá»ƒm tra hÃ nh lÃ½. SÃ¢n bay khÃ¡ váº¯ng vÃ chá»‰ cÃ³ chuyáº¿n bay c…	An unusual travel experience I've had was going out of the country for the first time. I had lots of layovers and when I got to the airport, it was much different than what it looks like in the United States. Traveling to Mexico, we had to check in with our airports and go to customs to check our bags. The airport was pretty empty and it was just my flight that was there. Afterward, we would head…	yes	about a bad experience with an employer or teacher.	Má»™t kinh nghiá»‡m tá»“i tá»‡ mÃ tÃ´i Ä‘Ã£ cÃ³ vá»›i má»™t giÃ¡o viÃªn lÃ há» khÃ´ng tráº£ lá»i email cá»§a tÃ´i. TÃ´i Ä‘Ã£ yÃªu cáº§u gia háº¡n vÃ há» Ä‘Ã£ cháº¥p thuáº­n nhÆ°ng há» Ä‘Ã£ khÃ´ng ná»™p Ä‘iá»ƒm cá»§a tÃ´i Ä‘Ãºng háº¡n Ä‘á»ƒ tÃ´i nháº­n Ä‘Æ°á»£c Ä‘iá»ƒm trÃªn báº£ng Ä‘iá»ƒm cá»§a mÃ¬nh.	"A bad experience I have had with a teacher was them not responding to my emails. I have asked for an extension which they have approved but they did not submit my grades on time for me to receive it on my transcript. "	yes	P70	Great info	N/A	manual_translation	Neutral	Neutral	Neutral
60ff14c9987163faf9bf15fa	English	French	Twi					English	French	Twi		Never Used it	Used it occasionally in the past but have stopped	Currently use it, but occasionally	Currently use it, but occasionally	Currently use it, but occasionally	Currently use it heavily	Never Used it	Never Used it	Currently use it, but occasionally	Used it occasionally in the past but have stopped	Currently use it heavily	Never Used it	No	Yes	Google translate						French	fr	Only MT	about a bad retail experience you recently had.	Mon dieu, je suis trÃ¨s fatiguÃ© avec le gens qui travaille Ã Macy's. Pourquoi est-ce que difficile Ã aide moi avec mes questions sur les produits je veux?	My god, I'm very tired with the people who work at Macy's. Why is it difficult to help me with my questions about the products I want?	yes	explaining your opinion about a political controversy.	Il y a plus des personnes qui sont disputes avec ces problÃ¨mes. Ã€ mon avis, tout le monde devrait juste ferme ces bouches et entend.	There are more people who are quarreling with these problems. In my opinion, everyone should just shut those mouths and hear.	yes	P219	ok	n/a	only_MT	Somewhat agree	Somewhat agree	Neutral
60ff1539d9a91f7b81bb2806	English	Spanish	Finnish					English				Used it occasionally in the past but have stopped	Used it occasionally in the past but have stopped	Currently use it, but occasionally	Never Used it	Used it heavily in the past but have stopped	Currently use it, but occasionally	Never Used it	Used it occasionally in the past but have stopped	Used it occasionally in the past but have stopped	Currently use it, but occasionally	Currently use it heavily	Never Used it	Yes	Yes	Instagram						French	fr	Only MT	about something funny that happened to you during a meeting.	Pendant une rÃ©union dans Zoom, jâ€™ai oubliÃ© dâ€™Ã©teindre mon microphone. Câ€™Ã©tait embarrassant.	During a meeting in Zoom, I forgot to turn off my microphone. It was embarrassing.	yes	about a bad experience with an employer or teacher.	Mon professeur nâ€™excuserait pas mes cours manquÃ©s. Jâ€™ai manquÃ© pour le covid mais elle nâ€™a pas voulu Ã©couter.	My teacher would not excuse my missed classes. I missed for covid but she wouldn't listen.	yes	P155	Great info	No	only_MT	Neutral	Agree	Disagree
60ff1675f00a765cb05017e8	English	Spanish						English	Spanish			Currently use it heavily	Used it occasionally in the past but have stopped	Currently use it, but occasionally	Never Used it	Used it occasionally in the past but have stopped	Used it heavily in the past but have stopped	Never Used it	Never Used it	Never Used it	Currently use it, but occasionally	Currently use it heavily	Never Used it	No	Yes	Google translate	Papago					Spanish	es	Manual	about something funny that happened to you during a meeting.	Esto sucedio hace algunas semanas, estabamos teniendo una reunion de la junta en mi lugar de trabajo y comnce a experimentar una nariz que moquea. Cuando me roco el turno de dar un discurso y me quise levantar, me salio una mucosidad de la nariz y todos se divirtieron.	This happened some weeks ago , we were having a board meeting in my workplace and i started experiencing a running nose. When it get to my turn to give a speech and i wanted to stand up, some mucus drop from my nose and everybody was amused.	yes	about a heated argument you recently had with a family member.	Una discusiÃ³n acalorada que tuve recientemente con un miembro de mi familia fue cuando discutÃ­amos sobre la forma en que piensa la iglesia y sus puntos de vista sobre ciertas situaciones.	A heated argument I recently had with a family member was when we were arguing about the way the church thinks and their views on certain situations.	yes	P145	Great info	no	manual_translation	Neutral	Somewhat disagree	Neutral
60ff20b9b491b6057f1af216	English	Chinese (Mandarin)						English	Chinese (Mandarin)			Currently use it, but occasionally	Currently use it, but occasionally	Currently use it heavily	Never Used it	Used it heavily in the past but have stopped	Currently use it heavily	Used it occasionally in the past but have stopped	Currently use it, but occasionally	Currently use it, but occasionally	Currently use it, but occasionally	Currently use it, but occasionally	Used it heavily in the past but have stopped	Yes	Yes	Google Translate						Chinese	zh-CN	MT with edit	about something funny that happened to you during a meeting.	ä»Šå¤©ä¸»æŒäººæœ¬æ¥åº”è¯¥å‘Šè¯‰æˆ‘ä»¬ä»–ä»¬çš„äº§å“ï¼Œå¯æ˜¯ä»–ä¸€æ‰“å¼€ç”µè„‘æ—¶å€™ï¼Œå°é²¨é±¼æ­Œå‡ºçŽ°äº†ï¼Œå¾ˆå¤§å£°çš„æ’­æ”¾ï¼Œè€æ¿éƒ½å“äº†ä¸€è·³å“ˆå“ˆå“ˆå“ˆ	Today the host should have told us about their products, but when he turned on the computer, the baby shark song appeared and played so loudly that the boss was even startled hahahaha	yes	about a heated argument you recently had with a family member.	æˆ‘æ²¡æƒ³åˆ°è¯ä»Žçˆ¶æ¯ä¼šæ€Žä¹ˆåˆºè€³ã€‚ã€‚ã€‚ä¸ª_ä¸ª	I didn't realize how harsh words from parents could be. . . ä¸ª_ä¸ª	yes	P86	good	no	MT_with_edit	Strongly disagree	Disagree	Disagree
60ff8047363582fe6e0f6229	English							English				Currently use it heavily	Currently use it, but occasionally	Currently use it, but occasionally	Never Used it	Currently use it heavily	Currently use it, but occasionally	Never Used it	Never Used it	Never Used it	Used it heavily in the past but have stopped	Currently use it heavily	Never Used it	No	Yes	Spanishdict						Spanish	es	Only MT	about something funny that happened to you during a meeting.	Soy un estudiante universitario asÃ­ que todavÃ­a no me ha pasado nada divertido durante una reuniÃ³n.	I'm a college student so nothing fun has ever happened to me during a meeting.	yes	about a heated argument you recently had with a family member.	recientemente mi mamÃ¡ se enojÃ³ conmigo por no pasar suficiente tiempo con mi familia	recently my mom got mad at me for not spending enough time with my family	yes	P52	ok	no	MT_with_edit	Disagree	Strongly agree	Disagree
60ff8160e8f2227f8b200510	English	German	French	Luxembourgish				English				Currently use it heavily	Used it heavily in the past but have stopped	Currently use it heavily	Currently use it heavily	Currently use it, but occasionally	Currently use it heavily	Never Used it	Currently use it heavily	Currently use it, but occasionally	Currently use it heavily	Currently use it heavily	Currently use it heavily	Yes	Yes	Google translate						German	de	Only MT	about a bad retail experience you recently had.	Ich ging zum BekleidungsgeschÃ¤ft und keiner der Angestellten trug Masken. Ich fÃ¼hlte mich so unwohl, dass ich sofort gegangen bin.	I went to the clothing store and none of the employees were wearing masks. I felt so uncomfortable that I left immediately.	yes	explaining your opinion about a political controversy.	Ich verstehe nicht, warum die Vereinigten Staaten nicht mehr tun, um der Ukraine bei der russischen Invasion und dem Krieg zu helfen.	I don't understand why the United States isn't doing more to help Ukraine with the Russian invasion and war.	yes	P160	Great info	No	only_MT	Somewhat agree	Agree	Somewhat disagree
60ffae39406f5e4035c8dea0	English	Spanish						English				Currently use it, but occasionally	Currently use it, but occasionally	Currently use it, but occasionally	Currently use it heavily	Used it heavily in the past but have stopped	Currently use it, but occasionally	Currently use it, but occasionally	Used it heavily in the past but have stopped	Used it heavily in the past but have stopped	Currently use it, but occasionally	Currently use it, but occasionally	Used it heavily in the past but have stopped	Yes	Yes	Facebook	Hangout.	Whatsapp				Spanish	es	Manual	about something funny that happened to you during a meeting.	Esto sucedio hace algunas semanas, estabamos teniendo una reunion de la junta en mi lugar de trabajo y comnce a experimentar una nariz que moquea. Cuando me roco el turno de dar un discurso y me quise levantar, me salio una mucosidad de la nariz y todos se divirtieron.	This happened some weeks ago , we were having a board meeting in my workplace and i started experiencing a running nose. When it get to my turn to give a speech and i wanted to stand up, some mucus drop from my nose and everybody was amused.	yes	about a heated argument you recently had with a family member.	Esto sucedio el verano pasado. Fui a reuirme con mi hermano mayor para pedir mi parte de la propiendad familiar que se vendio. Cuando llegue a su casa y solicite mi propia parte, me dio algo de dinero que era aproximadamente el 35% del monto total, rechace el dinero y solicite mas, lo que el rechazo y provoco una acalorada discusion e incluso mas.	This happened last summer i went to meet with my elder brother for my own share of our family property that was sold. When i got to his house and requested for my own share, he gave me some money which was about 35% of of the total amount, i refused the money and requested for more which he refused and it led to a heated argument and even more.	yes	P16	Great info	no	manual_translation	Somewhat agree	Somewhat agree	Agree
61003bb158741c6a1d79903b	English	Hindi	Kashmiri					English	Hindi			Currently use it, but occasionally	Currently use it heavily	Currently use it heavily	Currently use it heavily	Used it occasionally in the past but have stopped	Currently use it heavily	Never Used it	Currently use it, but occasionally	Currently use it, but occasionally	Currently use it heavily	Currently use it heavily	Never Used it	Yes	Yes	Google Translate						Hindi	hi	Only MT	about a funny situation where you were distracted by your mobile phone.	à¤¸à¤¬ à¤ªà¤¾à¤¨à¥€ à¤ªà¥€ à¤°à¤¹à¥ˆ à¤¹à¥ˆ, à¤®à¥‡à¤°à¤¾ à¤ªà¤¾à¤¨à¥€ à¤¨à¤¾à¤• à¤®à¥‡ à¤šà¤²à¤¾ à¤—à¤¯à¤¾	Everyone is drinking water, my water has gone into my nose	yes	about a bad experience with an employer or teacher.	à¤®à¥‡à¤°à¥€ à¤¬à¤¾à¤¸ à¤¨à¥‡ à¤®à¥‚à¤œà¤ªà¤° à¤šà¤¿à¤²à¤²à¤¾à¤¯à¤¾	my bass shouted at the moose	no	P17	good	Just finiding hindi letters was tough	only_MT	Somewhat agree	Agree	Disagree
610042a4e16b5635e899c57c	English	Cantonese						English				Currently use it, but occasionally	Currently use it heavily	Currently use it heavily	Used it occasionally in the past but have stopped	Currently use it heavily	Currently use it heavily	Currently use it, but occasionally	Currently use it, but occasionally	Currently use it, but occasionally	Currently use it, but occasionally	Currently use it heavily	Used it occasionally in the past but have stopped	Yes	Yes	google translate	SayHi					Spanish	es	MT with edit	about a funny situation where you were distracted by your mobile phone.	Hoy me encontre en una person porque estaba en mi telefono y me ha caido mi cafe	Today I found myself in a person because I was on my phone and my coffee fell	no	about a heated argument you recently had with a family member.	Queria salir con mis amigos pero mi madres no me dejo y empezamos una discusion.	I wanted to go out with my friends but my mothers wouldn't let me and we started an argument.	yes	P137	Good info	n/a	only_MT	Somewhat agree	Somewhat agree	Neutral
610062ee974b300d7d7e0e61	English							English	Japanese			Used it occasionally in the past but have stopped	Used it occasionally in the past but have stopped	Used it heavily in the past but have stopped	Never Used it	Used it heavily in the past but have stopped	Currently use it, but occasionally	Never Used it	Never Used it	Never Used it	Currently use it, but occasionally	Currently use it heavily	Used it occasionally in the past but have stopped	Yes	Yes	google translate						Japanese	ja	Only MT	about an unusal travel experience that you had.	ä¸€å¹´å‰ã« Canadaã¾ã§ é‹è»¢ ã—ã¾ã—ãŸã€‚ãã®æ—¥ã« policemenãŒ è»Š ã‹ã‚‰ å‡ºã¦ä¸‹ã•ã„ å½“ã‚ã‚Œã¾ã—ãŸã€‚ã‚¯ãƒ«ãƒžã® ä¸­èº«ãŠ æŽ¢ã—ã¾ã—ãŸã€‚	I drove to Canada a year ago. On that day, policemen got out of the car and was hit. I searched for the contents of the car.	no	about a bad experience with an employer or teacher.	ã‚ã‚‹æ—¥ã« å…ˆç”ŸãŒ å­¦ç”ŸãŠ è¦³ã¦ã¦ ãƒ’ãƒ§ã‹ãŠ ã—ã¦ã¾ã—ãŸã€‚ãã®æ—¥ã« ã‚ãŸã—ã‚ ã‚¯ãƒ©ã‚¹ã« ã‚ˆã æ¥ã¦ã¾ã›ã‚“ã§ å…ˆç”ŸãŒ èµ·ã“ã‚Šã¾ã—ãŸã€‚	One day, the teacher was watching the students and was horrifying. On that day, I didn't come to my class often, and the teacher happened.	no	P61	Translation quality looks bad, great info	no	only_MT	Somewhat agree	Somewhat disagree	Somewhat agree
6100c17164f9f4c063f4d25f	English	Spanish						English	Hindi			Currently use it heavily	Used it occasionally in the past but have stopped	Used it heavily in the past but have stopped	Used it occasionally in the past but have stopped	Used it heavily in the past but have stopped	Currently use it, but occasionally	Never Used it	Used it heavily in the past but have stopped	Never Used it	Currently use it, but occasionally	Currently use it heavily	Currently use it, but occasionally	Yes	Yes	Google Translate						Spanish	es	Only MT	about an unusal travel experience that you had.	Una vez, mis amigas y yo fuimos de viaje. Nosotras fuimas al Lago Havasu. El Lago es muy bonita, pero la gente que vive alrededor del lago es muy racista. Mis amigas y yo no podiamos salir de noche, y no nos sentiamos seguros.	Once, my friends and I went on a trip. We went to Lake Havasu. The lake is very beautiful, but the people who live around the lake are very racist. My friends and I couldn't go out at night, and we didn't feel safe.	yes	about a heated argument you recently had with a family member.	Recientemente, mis abuelos fallecieron. Mi mamÃ¡ y yo nos peleamos porque ella no comprendÃ­a mi dolor ni procesaba su pÃ©rdida.	Recently, my grandparents passed away. My mom and I got into a fight because she didn't understand my pain or process her loss.	yes	P165	Great info	No	MT_with_edit	Strongly disagree	Strongly agree	Strongly disagree
6101b0045f55decb70142341	English	Cajun French						English				Used it occasionally in the past but have stopped	Currently use it, but occasionally	Currently use it heavily	Never Used it	Currently use it, but occasionally	Currently use it heavily	Never Used it	Never Used it	Currently use it, but occasionally	Used it occasionally in the past but have stopped	Currently use it heavily	Never Used it	Yes	Yes	Google Translate						Spanish	es	MT with edit	about a funny situation where you were distracted by your mobile phone.	Hola, buenos dias. Yo conozco muy pequeno espanol, yo soliento.	Hello good morning. I know very little Spanish, I usually.	yes	about a heated argument you recently had with a family member.	mi padre es muy dificle. yo soy a problemo como elle. yo siento para eres escribo.	My father is very difficult. I am a problem with him. I feel for you I write.	yes	P116	ok	no	MT_with_edit	Strongly disagree	Agree	Strongly disagree
61022d2f69d5127750d09f40	English	Turkish						English				Used it occasionally in the past but have stopped	Used it occasionally in the past but have stopped	Currently use it heavily	Currently use it, but occasionally	Currently use it, but occasionally	Currently use it, but occasionally	Never Used it	Currently use it, but occasionally	Currently use it, but occasionally	Currently use it, but occasionally	Currently use it heavily	Used it heavily in the past but have stopped	I am not sure	Yes	Google translate						Turkish	tr	MT with edit	about an unusal travel experience that you had.	gecen gun, bir magaza gittim, ksada 15 dk bekledim asagaya inip yardim istedim, yukariya geri don biri gelir dediler. Kimse gelmedi, elmdekini birakip ciktim.	The other day, I went to a store, I waited for 15 minutes, I went downstairs and asked for help, they said go back upstairs and someone will come. Nobody came, I put down what I was holding and left.	yes	explaining your opinion about a political controversy.	ABD nin en ust seviye hakimini secmeye calisiyorlar. Adamlar diyor ki cok iyisin,egitimlisin, akillisin, saygidarsin ama ben hatir diyorum. Cok sacma degil mi sirf diger partiye karsi cikmak icin hak eden birine is vermeyecekler.	They are trying to choose the highest level judge of the USA. The men are saying that she is very good, educated, smart, respectable but I say no. Isn't it ridiculous, that they won't give a job to someone who deserves it just to go against the other party.	yes	P139	Great info	no	MT_with_edit	Strongly disagree	Disagree	Strongly disagree
61031099119779bccc1a37bb	English	Spanish						English	Spanish			Used it occasionally in the past but have stopped	Used it occasionally in the past but have stopped	Currently use it heavily	Currently use it heavily	Currently use it heavily	Currently use it, but occasionally	Never Used it	Never Used it	Used it occasionally in the past but have stopped	Never Used it	Currently use it heavily	Used it heavily in the past but have stopped	Yes	Yes	google translate						Portugese	pt	MT with edit	about something funny that happened to you during a meeting.	Amo-te de coraÃ§Ã£o e alma \n	I love you with heart and soul\n	yes	explaining your opinion about a political controversy.	Acho que os direitos das armas sÃ£o um tema que deve ser discutido, porque as pessoas morrem todos os dias devido a incidentes com armas. E em vez de se unirem para resolver este problema, os democratas e republicanos tornam os argumentos pessoais e agressivos.	I think gun rights are a topic that should be discussed, because people die every day from gun incidents. And instead of coming together to solve this problem, Democrats and Republicans are making the arguments personal and aggressive.	yes	P132	Good info	no	MT_with_edit	Disagree	Agree	Disagree
6103217087c7017449a039d8	English	Spanish						English	Spanish			Currently use it, but occasionally	Currently use it heavily	Currently use it heavily	Used it heavily in the past but have stopped	Used it heavily in the past but have stopped	Currently use it, but occasionally	Used it occasionally in the past but have stopped	Currently use it, but occasionally	Used it occasionally in the past but have stopped	Currently use it, but occasionally	Currently use it heavily	Used it occasionally in the past but have stopped	Yes	Yes	google translate						Spanish	es	Manual	"about something funny that happened to you during a meeting."	"Una vez cuando estaba en una junta con mi jefe y mi supervisora, mi supervisora tenia su perro en sus piernas y el perro empezo a ladrarle a otro perro. En ese momento el perro brinco a la mesa y toda la comida y las bebidas salieron volando y nos salpicaron a todos y nos ensuciamos. Obviamente en el momento no fue gracioso pero ahora recordandolo si lo fue."	"One time when I was in a meeting with my boss and supervisor, my supervisor had her dog on her lap and the dog started to bark at another dog. At that moment the dog jumped onto the table and all the food and drinks flew and it poured on us and got us dirty. Obviously in the moment it was not funny but now remembering it was."	yes	"explaining your opinion about a political controversy."	"A mi no me gusta entrar en platicas de politicas con la gente, y muchas veces no me gusta decir de que lado soy. Observo como hay mucha discordia y peleas entre personas y hasta en las mismas familias sobre politica entonces prefiero guardarme esas cosas para mi sola."	"I do not like to enter into conversations about politics with people, and a lot of the time I dont like to say what side I am on. I observe how there is so much discord and fights between people and even with the same families about politics so i prefer to store those things for myself."	yes	P49	good	no	manual_translation	Somewhat disagree	Agree	Disagree
610360d339cd3c8e0cbad2e3	English	Arabic						English	Arabic			Currently use it, but occasionally	Never Used it	Used it occasionally in the past but have stopped	Used it occasionally in the past but have stopped	Currently use it heavily	Currently use it, but occasionally	Never Used it	Never Used it	Never Used it	Currently use it, but occasionally	Currently use it heavily	Never Used it	Yes	I am not sure							Arabic	ar	Manual	about an unusal travel experience that you had.	Ø°Ù‡Ø¨Øª Ø¥Ù„Ù‰ Ø¨ÙˆØ±ØªÙˆØ±ÙŠÙƒÙˆ Ø¹Ù†Ø¯Ù…Ø§ ÙƒÙ†Øª Ø£ØµØºØ± Ø³Ù†Ù‹Ø§ ÙˆØ£Ø­Ø¨Ù‡Ø§. ÙƒØ§Ù† Ø§Ù„Ø°Ù‡Ø§Ø¨ Ø¥Ù„Ù‰ Ø§Ù„Ø´Ø§Ø·Ø¦ ÙƒÙ„ ÙŠÙˆÙ… Ù…Ù…ØªØ¹Ù‹Ø§ Ù„Ù„ØºØ§ÙŠØ©. ÙˆÙ„ÙƒÙ† Ø¨Ø¹Ø¯ Ø°Ù„Ùƒ Ø´Ø¹Ø±Øª Ø¨Ø§Ù„Ø¥Ø±Ù‡Ø§Ù‚ Ø¨Ø³Ø¨Ø¨ ÙˆØ¬ÙˆØ¯ Ø´Ø§Ø·Ø¦ Ø¹Ø§Ø±ÙŠ.\n	I went to puerto rico when I was younger and I love it. It was so much fun going to the beach everyday. But then I was weired out because there was a nude beach.	yes	about a heated argument you recently had with a family member.	ØªØ´Ø§Ø¬Ø±Øª Ù…Ø¹ Ø¨Ù„Ø¯ÙŠ Ø­ÙˆÙ„ Ø§Ù„Ø°Ù‡Ø§Ø¨ Ø¥Ù„Ù‰ Ø§Ù„Ø¨Ø­Ø§Ø± Ù„Ø£Ù†Ù†ÙŠ Ù„Ø§ Ø£Ø±ÙŠØ¯ Ø°Ù„Ùƒ.\n	I fought with my mom about going over seas because I don't want to.	yes	P208	good	no	manual_translation	Somewhat agree	Somewhat agree	Somewhat agree
61036b968e883dc6b02687e4	English	Arabic						English	Arabic			Used it occasionally in the past but have stopped	Currently use it heavily	Currently use it heavily	Currently use it, but occasionally	Currently use it heavily	Currently use it heavily	Used it occasionally in the past but have stopped	Currently use it, but occasionally	Currently use it, but occasionally	Never Used it	Currently use it heavily	Never Used it	Yes	Yes	Google Translate						Arabic	ar	Only MT	about something funny that happened to you during a meeting.	Ø®Ù„Ø§Ù„ Ø§Ù„Ø§Ø¬ØªÙ…Ø§Ø¹ Ø§Ù„Ø§Ø®ÙŠØ± Ø¹Ù†Ø¯Ù…Ø§ ÙƒÙ†Ø§ Ø¹Ù„Ù‰ ÙˆØ´Ùƒ Ø§Ù„Ù…ØºØ§Ø¯Ø±Ø©ØŒ Ù†Ø¸Ø±Øª Ø§Ù„Ù‰ Ø§Ù‚Ø¯Ø§Ù…ÙŠ Ùˆ Ø§Ù†Ø§ Ø¹Ù„Ù‰ ÙˆØ´Ùƒ Ø§Ù„Ù‚ÙŠØ§Ù… Ù…Ù† Ø§Ù„ÙƒØ±Ø³ÙŠ Ø§Ø° Ø¨Ù‡ Ø¨Ø­Ø´Ø±Ø© ØªÙ…Ø´ÙŠ Ø¹Ù„Ù‰ Ø­Ø§ÙØ© Ù‚Ø¯Ù…ÙŠ Ùˆ Ù‚ÙØ²Øª Ù…Ù† Ù…Ø­Ù„ÙŠ Ùˆ Ø®Ø¨Ø·Ø· Ø¨Ø§Ù„Ø·Ø§ÙˆÙ„Ø©	During the last meeting when we were about to leave, I looked at my feet as I was about to get up from the chair when a bug was walking on the edge of my feet and I jumped out of my place and banged on the table.	yes	about a heated argument you recently had with a family member.	ÙƒÙ†Ø§Ù†ØªÙ†Ø§Ù‚Ø´ Ø§Ù†Ø§ ÙˆØ§Ø®ÙŠ Ø¨Ø´Ø§Ø§Ù† Ù…Ù† ÙŠØ¬Ø¨ Ø¹Ù„ÙŠÙ‡ Ø§Ø­Ø¶Ø§Ø± Ø§Ù„Ø§Ø³Ù…Ø§Ùƒ	My brother and I were discussing who should bring the fish	no	P212	good info		only_MT	Agree	Neutral	Disagree
61047148ebe1f9c8610d2f94	English	Spanish						English	Spanish			Currently use it, but occasionally	Currently use it, but occasionally	Currently use it, but occasionally	Used it occasionally in the past but have stopped	Currently use it, but occasionally	Used it occasionally in the past but have stopped	Never Used it	Currently use it, but occasionally	Currently use it, but occasionally	Currently use it, but occasionally	Currently use it, but occasionally	Used it occasionally in the past but have stopped	I am not sure	Yes	google translate						Italian	it	Only MT	about a bad retail experience you recently had.	io e il mio compagno di recente ci siamo presi una pausa ed Ã¨ stata la cosa piÃ¹ difficile di sempre. Lui Ã¨ il mio migliore amico e spero che alla fine le cose funzionino per il meglio per entrambi.	me and my partner recently took a break and it has been the hardest thing ever. He is my bestfriend and i hope in the end things work out for the better for both of us.	yes	about a heated argument you recently had with a family member.	Non vedo la mia famiglia tanto, quindi non posso davvero relazionarmi con questa domanda e non ho discussioni con loro.	i dont see my family as much so i cannot really relate to this question and do not have arguments with them.	yes	P176	second response ok	n/a	manual_translation	Neutral	Disagree	Disagree
6104ada20a23ca6a7d88283d	English	Spanish						English	Spanish			Used it occasionally in the past but have stopped	Used it occasionally in the past but have stopped	Used it occasionally in the past but have stopped	Never Used it	Used it occasionally in the past but have stopped	Currently use it heavily	Never Used it	Currently use it, but occasionally	Used it occasionally in the past but have stopped	Never Used it	Currently use it heavily	Used it heavily in the past but have stopped	Yes	Yes	Google Translate						Spanish	es	Manual	about an unusal travel experience that you had.	No van a creer la experiencia que tuve en Illinois el aÃ±o pasado! Teniamos que acer una parada en Arizona y estaba muy caliente. mas de 100 grados! pero, finalmente llegamos a Chicago.	You guys are not going to believe the experience I had in Illinois last year! We had to make a stop in Arizona and it was very hot. over 100 degrees! but, finally we arrived at Chicago.	yes	about a bad experience with an employer or teacher.	Tenia este maestro en mi primer aÃ±o en la universidad. Solo era el assistente del professor para el laboratorio del curso. El se pensaba muy macho y empezo a dicer me cosas porque yo estaba en mi telefono durante la leccion. Hmph como si estuvieramos en la secundaria!	I had this teacher in my first year in university. He was only the professorÂ´s assistant for the lab of the course. He thought he was the shit and started telling me things because I was on my phone during the lesson. Hmph as if we were in high school!	yes	P148	Great info	no	manual_translation	Somewhat disagree	Somewhat disagree	Somewhat agree
61071e6e0e9a6eb6a330a628	English							English				Used it occasionally in the past but have stopped	Used it heavily in the past but have stopped	Currently use it, but occasionally	Used it occasionally in the past but have stopped	Currently use it heavily	Currently use it heavily	Never Used it	Never Used it	Currently use it heavily	Currently use it, but occasionally	Currently use it heavily	Used it heavily in the past but have stopped	I am not sure	Yes	google translate						Spanish	es	Manual	"about a bad retail experience you recently had."	"Un dia yo fui a las compras. Los trabajadores eran muy maleducados."	"One day I went to the store. The workers were very rude. "	yes	"about a bad experience with an employer or teacher."	"En el ano pasado, mi profesor me gritado en frente de la clase. "	"Last year, my professor yelled at me in front of the class. "	yes	P65	ok	No	manual_translation	Somewhat agree	Neutral	Somewhat agree
610825cfde106b41438710ac	English	Arabic						English	Arabic			Currently use it heavily	Currently use it, but occasionally	Currently use it heavily	Currently use it heavily	Used it heavily in the past but have stopped	Currently use it heavily	Never Used it	Currently use it, but occasionally	Never Used it	Used it occasionally in the past but have stopped	Currently use it heavily	Used it heavily in the past but have stopped	Yes	Yes	google translate						Arabic	ar	Manual	about a bad retail experience you recently had.	Ù…Ø±Ø© ØªÙ… ØªØµÙ†ÙŠÙÙŠ Ø¹Ù†ØµØ±ÙŠÙ‹Ø§ ÙÙŠ Ù…ØªØ¬Ø± Ù„Ø¨ÙŠØ¹ Ø§Ù„Ù…Ù„Ø§Ø¨Ø³ Ù„Ø£Ù†Ù†ÙŠ Ø§Ù…Ø±Ø£Ø© Ø³ÙˆØ¯Ø§Ø¡. ÙƒÙ†Øª Ø­Ø²ÙŠÙ†Ù‹Ø§ ÙˆØºØ§Ø¯Ø±Øª Ø§Ù„Ù…ØªØ¬Ø± Ø­Ø²ÙŠÙ†Ù‹Ø§ Ø¬Ø¯Ù‹Ø§	I once was racially profiled at a clothing store because I am a black woman. It was sad and I left the store very unhappy.	yes	about a bad experience with an employer or teacher.	ÙˆØ¨Ø®ØªÙ†ÙŠ Ø¥Ø­Ø¯Ù‰ Ø§Ù„Ù…Ø¯Ø±Ø³Ø§Øª Ø°Ø§Øª Ù…Ø±Ø© Ù„Ø£Ù†Ù†ÙŠ Ø§Ø³ØªØ¹Ø±Øª Ø¯Ø¨Ø§Ø³ØªÙ‡Ø§ Ø¯ÙˆÙ† Ø£Ù† Ø£Ø³Ø£Ù„. ÙƒØ§Ù†Øª Ù„Ø¦ÙŠÙ…Ø© Ø¬Ø¯Ø§ Ø­ÙŠØ§Ù„ Ø°Ù„Ùƒ.	I once was scolded by a teacher for borrowing her stapler without asking. She was very mean about it.	yes	P105	great info	no	manual_translation	Strongly disagree	Disagree	Agree
610959c4bde8b758f8b860fc	English	Spanish	tagalog					English	French			Currently use it, but occasionally	Never Used it	Currently use it, but occasionally	Used it heavily in the past but have stopped	Currently use it heavily	Currently use it heavily	Never Used it	Never Used it	Used it occasionally in the past but have stopped	Currently use it, but occasionally	Currently use it heavily	Currently use it, but occasionally	Yes	Yes	twitter						French	fr	Only MT	about something funny that happened to you during a meeting.	c'est drÃ´le ce blaque	this joke is funny	yes	about a bad experience with an employer or teacher.	cette prof m'a donnÃ© une mauvaise note simplement parce que je suis endormie une fois. J'avais Ã©tÃ© debout toute la nuit Ã etudier et j'avais obtenu toutes les bonnes rÃ©ponses, mais elle m'a quand mÃªme Ã©cohue	This teacher gave me a bad grade just because I fell asleep once. I'd been up all night studying and got all the answers right, but she still failed me.	yes	P43	ok	no	only_MT	Neutral	Agree	Agree
610a467dd7fea28a33996c9c	English	Chinese						English	Chinese			Used it occasionally in the past but have stopped	Used it heavily in the past but have stopped	Currently use it heavily	Used it occasionally in the past but have stopped	Used it heavily in the past but have stopped	Currently use it heavily	Currently use it, but occasionally	Used it occasionally in the past but have stopped	Used it occasionally in the past but have stopped	Currently use it heavily	Used it occasionally in the past but have stopped	Never Used it	Yes	Yes	Google translate						Chinese	zh-CN	Only MT	about an unusal travel experience that you had.	æœ‰ä¸€æ¬¡æˆ‘è·Ÿæˆ‘çš„å®¶äººä¸€èµ·åŽ»å¢¨è¥¿å“¥æ—…æ¸¸ï¼Œæ¯å¤©å¾ˆå¼€å¿ƒï¼Œå¯æ˜¯æœ‰ä¸€å¤©ï¼Œåœ¨æµ·è¾¹çŽ©çš„æ—¶å€™ï¼Œçªç„¶æˆ‘æ„Ÿè§‰åˆ°ä»€ä¹ˆä¸œè¥¿ç¢°åˆ°æˆ‘çš„è„šã€‚æˆ‘å¾€ä¸‹çœ‹â€”åŽŸæ¥æ˜¯æ¡é±¼åœ¨æ¸¸æ¥æ¸¸åŽ»ã€‚æˆ‘çš„æ¯äº²ç«‹é©¬æ‹¿å‡ºæ‰‹æœºæ‹ç…§ã€‚	Once I traveled to Mexico with my family, I was very happy every day, but one day, while playing at the beach, I suddenly felt something touch my feet. I looked down - it turned out to be a fish swimming around. My mother immediately took out her phone to take a picture.	yes	about a heated argument you recently had with a family member.	åœ¨ä¸‹å¤©çš„æ—¶å€™ï¼Œæˆ‘ä¸æ˜¯å¾ˆå–œæ¬¢å¼€æˆ‘çš„æˆ¿é—´çš„çª—å¸˜ï¼Œå› ä¸ºæˆ‘è§‰å¾—å¤ªæ™’äº†ã€‚å¯æ˜¯æˆ‘çš„å¦ˆå¦ˆç‰¹åˆ«ä¸èµžåŒæˆ‘ä¸å¼€çª—å¸˜ï¼Œæ‰€ä»¥æ¯æ¬¡è¿›æˆ‘å±‹ä¼šæŠŠçª—å¸˜æ‹‰å¼€ã€‚å¯æ˜¯å¥¹æ¯æ¬¡æ‹‰å¼€çª—å¸˜åŽï¼Œæˆ‘ä¼šæŠŠçª—å¸˜åˆå…³èµ·æ¥ã€‚æˆ‘è¿™æ ·åšè¢«å¥¹å‘çŽ°äº†ã€‚ä»–å¯¹æˆ‘å¾ˆç”Ÿæ°”ã€‚çžªç€çœ¼å¯¹æˆ‘ç”Ÿæ°”çš„è¯´ï¼ŒæŠŠçª—å¸˜å¼€ç€ï¼æ™’å¤ªé˜³ä¼šæ€ç»†èŒï¼ä¼šè¡¥å……vitamin C!	On the next day, I don't really like to open the curtains in my room because I think it's too sunny. But my mother disapproved of me not opening the curtains, so every time I entered my house, I would open the curtains. But every time she opened the curtains, I would close the curtains again. I was discovered by her. He was angry with me. Staring at me angrily, open the curtains! Sun exposure kil…	no	P195	Great info	No	only_MT	Neutral	Agree	Neutral
610c54c190d4d2399972b294	English							English				Used it occasionally in the past but have stopped	Currently use it heavily	Currently use it heavily	Used it occasionally in the past but have stopped	Never Used it	Currently use it heavily	Never Used it	Never Used it	Used it occasionally in the past but have stopped	Used it occasionally in the past but have stopped	Currently use it heavily	Used it occasionally in the past but have stopped	I am not sure	Yes	google translate						Turkish	tr	MT with edit	about a funny situation where you were distracted by your mobile phone.	Yururken bir guzel kiz gordum ve nerdeyse dustum.	While I was walking, I saw a beautiful girl and I almost fell.	yes	explaining your opinion about a political controversy.	Predient Trump gene geri getirmek gerek yeniden.	Predient Trump needs to be brought back again.	yes	P55	ok	none	MT_with_edit	Strongly disagree	Agree	Strongly disagree
610d9c03871a99c82d03e00b	English	Spanish	Russian					English				Used it heavily in the past but have stopped	Used it occasionally in the past but have stopped	Currently use it heavily	Currently use it, but occasionally	Currently use it, but occasionally	Currently use it heavily	Never Used it	Used it heavily in the past but have stopped	Used it occasionally in the past but have stopped	Currently use it heavily	Used it heavily in the past but have stopped	Used it occasionally in the past but have stopped	Yes	Yes	Google Translate	SpanishDict					Spanish		MT with edit	about a bad retail experience you recently had.	este cajero perra en la tienda era tan malo	this bitchy cashier in the store was so mean	yes	about a heated argument you recently had with a family member.	mi ma seguÃ­a gritÃ¡ndome, Â¿por quÃ© estaba tan molesta por los piercings?\n\n	my ma kept yelling at me, why was she so upset about piercings?\n\n	yes	P227	ok	Just a little bit of mistranslations and missing grammar in the auto translations	MT_with_edit	Strongly disagree	Agree	Strongly disagree
610f1080dee2889a226aae10	English	Spanish						English				Currently use it, but occasionally	Never Used it	Currently use it heavily	Currently use it, but occasionally	Currently use it, but occasionally	Used it heavily in the past but have stopped	Never Used it	Used it occasionally in the past but have stopped	Never Used it	Used it occasionally in the past but have stopped	Currently use it heavily	Used it heavily in the past but have stopped	Yes	Yes	Google translate						Spanish	es	Manual	about a bad retail experience you recently had.	Es tan tonto cuando todo lo que quieres es ayuda para encontrar zapatos de tu talla, pero el vendedor decidiÃ³ ser un imbÃ©cil en lugar de tener un servicio de atenciÃ³n al cliente.\n	It's so dumb when all you want is some help finding some shows in your size but the sales person decides to be a dick rather than have some customer service.	yes	about a bad experience with an employer or teacher.	El profesor de historia nunca nos dio tiempo para acostumbrarnos a las nuevas estrategias y tÃ©cnicas que implementarÃ­a. Fue horrible. No pudimos tener Ã©xito porque nunca hubo consistencia.\n	The history teacher never gave us time to become accustomed to the new strategies and techniques he would implement. It was awful. We weren't able to be successful as there was never any consistency.	yes	P171	Great info	no	manual_translation	Somewhat agree	Strongly agree	Neutral
61105a930c82ee86a4279e62	English	Spanish						English	Spanish			Currently use it heavily	Currently use it heavily	Currently use it heavily	Currently use it, but occasionally	Currently use it heavily	Currently use it heavily	Never Used it	Never Used it	Currently use it, but occasionally	Used it occasionally in the past but have stopped	Currently use it, but occasionally	Never Used it	Yes	Yes	Google chrome automatic translator	Social media translator					Spanish	es	Manual	"about an unusal travel experience that you had."	"Fui a un viaje misionero a Mississippi cuando estaba en octavo grado. Aprendo a nadar en el ocÃ©ano. Fue genial y extraÃ±o porque necesitas aprender a nadar en una piscina."	"I went on mission trip to Mississippi when I was in 8 grade. I learn how to swim in the ocean. It was cool and strange because you need to learn how to swim in a pool."	yes	"about a bad experience with an employer or teacher."	"TomÃ© una clase de gobierno con un maestro que era extremadamente parcial. Fue llevado ante el decano por un compaÃ±ero de clase que invirtiÃ³ las calificaciones debido a su actitud parcial."	"I took a government class with a teacher who was extremely biased. He was brought to the dean by a classmate who reverse grades due to his biased attiudle. "	yes	P96	Great info	No, nothing went wrong with the experiment.	manual_translation	Strongly disagree	Strongly agree	Strongly agree
6110d72aa69d55efca97d465	English	Armenian						English	Armenian			Currently use it heavily	Used it occasionally in the past but have stopped	Currently use it, but occasionally	Currently use it, but occasionally	Used it heavily in the past but have stopped	Currently use it, but occasionally	Never Used it	Currently use it, but occasionally	Currently use it, but occasionally	Currently use it, but occasionally	Currently use it heavily	Used it heavily in the past but have stopped	Yes	Yes	Google translate						French	fr	MT with edit	about a funny situation where you were distracted by your mobile phone.	Il y a plusieurs de temps que je ne regarde pas le place sur moi parce que je regard mon tÃ©lÃ©phone. Aujourd'hui j'ai frappÃ© une veille femme parce que je ne la vu pas!	There have been lots of times where I haven't looked at the area around me because I'm looking at my phone. Today I hit an old woman because I didn't see her!	no	about a bad experience with an employer or teacher.	Mon patron Ã me dit que je suis une chienne parce que je ne veux pas travailler pour son compagnie. Je le dÃ©teste.	My boss told me I'm a bitch because I don't want to work for his company. I hate him.	yes	P154	Great info	no	MT_with_edit	Disagree	Agree	Disagree
6110dd84c5e50f86928a6738	English	Spanish						English	Spanish			Used it occasionally in the past but have stopped	Currently use it heavily	Currently use it, but occasionally	Used it occasionally in the past but have stopped	Currently use it, but occasionally	Currently use it, but occasionally	Never Used it	Currently use it, but occasionally	Currently use it, but occasionally	Used it occasionally in the past but have stopped	Currently use it heavily	Never Used it	Yes	Yes	Tiktok	Instagram	Facebook				Spanish	es	Only MT	about a funny situation where you were distracted by your mobile phone.	Uno ves cuando estoy en la esuela yo puso tiktok enthonces yo ver un funny videos.	One time when I'm in school I put on tiktok so I watch funny videos.	yes	about a heated argument you recently had with a family member.	Mucho hombres piensa que la mujer necesita cocinar, limpar la casa y todo , pero es dos roles. Es para dos genders. La mujeres trabaja tambien enthonces dos personas puedes esas cosas.	Many men think that women need to cook, clean the house and everything, but it is two roles. It is for two genders. Women work too, so two people can do those things.	yes	P174	good info	Nope nothing went wrong.	MT_with_edit	Strongly disagree	Strongly agree	Strongly disagree
611131e47725f6a04c723651	English	Spanish						English	Spanish			Used it occasionally in the past but have stopped	Used it occasionally in the past but have stopped	Currently use it heavily	Currently use it, but occasionally	Currently use it, but occasionally	Currently use it heavily	Never Used it	Never Used it	Never Used it	Never Used it	Currently use it, but occasionally	Used it heavily in the past but have stopped	Yes	Yes	Google Translate						Spanish	es	Only MT	about a bad retail experience you recently had.	Hoy fui a Target y no pude encontrar mis galletas dulces favoritas. Le preguntÃ© a alguien que trabajaba ahÃ­ donde las podria encontrar, pero no me supo decir. Estoy muy decepcionada con el servicio de Target.	I went to Target today and couldn't find my favorite sweet cookies. I asked someone who worked there where I could find them, but he couldn't tell me. I am very disappointed in Target's service.	yes	explaining your opinion about a political controversy.	El sujeto de la inmigraciÃ³n es uno bien controversial en los Estados Unidos. Pero la gente debe de reconocer que la mayoridad de la gente que cruzan la frontera no son gente mala. Son gente que vienen a trabajar duro y a esforzarse para darles una vida mejor a su familia.	The subject of immigration is a very controversial one in the United States. But people need to recognize that most people who cross the border are not bad people. They are people who come to work hard and strive to provide a better life for their family.	yes	P158	Great info	Nothing went wrong in the experiment	only_MT	Somewhat agree	Strongly agree	Neutral
61113d4b59cd887f1b5b91cb	English	Spanish						English				Never Used it	Currently use it, but occasionally	Currently use it heavily	Currently use it, but occasionally	Currently use it heavily	Currently use it heavily	Never Used it	Never Used it	Used it heavily in the past but have stopped	Currently use it, but occasionally	Currently use it heavily	Never Used it	No	Yes	google						Spanish	es	Manual	about an unusal travel experience that you had.	Mi familia decidio el ano pasado que deberiamos ir a Phoenix, Arizona. Queriamos ir por sus centros comerciales y esperabamos el calor pero no como el calo que soportamos. Fue horrible! 113 grados fue demasiasdo para nosotros. Prometimos muncas mas visitar Arizona, especialmente en el verano.	My family decided the past year that we would go to Phoenix Arizona. We wanted to go for their malls and we did expect the heat, but not the heat we endured. It was horrible! 113 degrees was too much for us. We promised one another that we would never again visit Arizona, especially in the summer.	yes	explaining your opinion about a political controversy.	Inmediatamente, lo que me viene a la mente es el aborto. Creo que las mujeres deberian tener un control total sobre lo que le hacen a su cuerpo. Puede ser moralmente incorrecto que ciertos individuos participen en tales acciones, pero no les haria dano si otro individuo decide que es lo mejor para ellos.	Immediately, what comes to mind is abortion. I believe that women should have complete say in what they should do to their bodies. It may be morally wrong for certain individuals to participate in such actions, but it would not do harm to them if another individual decides it is what is best for them.	yes	P183	Great info	nothing went wrong	manual_translation	Disagree	Agree	Neutral
6111f4c088e67493df7f3fb9	English	German	Korean					English				Currently use it heavily	Used it occasionally in the past but have stopped	Used it occasionally in the past but have stopped	Used it occasionally in the past but have stopped	Currently use it heavily	Currently use it heavily	Never Used it	Currently use it, but occasionally	Never Used it	Currently use it heavily	Currently use it heavily	Currently use it, but occasionally	Yes	Yes	Google translate						German	de	Manual	about a bad retail experience you recently had.	Heute, habe ich ein schlechtes Erlebnis. Ich fÃ¼hle verÃ¤rgert :l	Today I had a bad experience. I feel annoyed :l	yes	about a heated argument you recently had with a family member.	Meine Ã¤ltere Schwester ist total falsch Ã¼ber viele Dinge. Sie ist nicht nur dickkÃ¶pfig, sondern auch engstirnig.	My older sister is totally wrong about lots of things. She is not only stubborn, but also close-minded.	yes	P198	OK	Nothing went wrong with the experiment.	manual_translation	Strongly disagree	Somewhat disagree	Neutral
611291090e626fdfde536f38	English	Spanish	French	Yoruba				English	Yoruba			Currently use it, but occasionally	Used it heavily in the past but have stopped	Currently use it, but occasionally	Currently use it, but occasionally	Currently use it, but occasionally	Currently use it heavily	Never Used it	Currently use it, but occasionally	Currently use it, but occasionally	Currently use it, but occasionally	Currently use it, but occasionally	Currently use it, but occasionally	I am not sure	Yes	Google Translate.						Yoruba	yo	Only MT	about a funny situation where you were distracted by your mobile phone.	Mi tie wobi ti mo n lo nigba ti mo n bo nile. Die loku ki gbogbo nkan to wa lowo mi danu.	I don't know where I was going when I came home. I was about to lose everything I had.	yes	about a bad experience with an employer or teacher.	Mo ma gbagbe ise ile to fun wa lana ma ni. Loba binu si mi to lo n fe fi egba sidi mi.	I will never forget the homework we were given yesterday. He was angry with me and wanted to beat me.	no	P159	Great info	The translations were remarkably close but not correct. I tried to edit one but couldn't	only_MT	Agree	Somewhat agree	Agree
6114ca7ecf91e5cece10d5e1	English	Spanish						English	Spanish			Used it occasionally in the past but have stopped	Used it occasionally in the past but have stopped	Currently use it heavily	Currently use it, but occasionally	Used it heavily in the past but have stopped	Currently use it heavily	Never Used it	Never Used it	Currently use it, but occasionally	Currently use it heavily	Currently use it heavily	Never Used it	Yes	Yes	Google Translate						Spanish	es	MT with edit	about something funny that happened to you during a meeting.	Mientras hablaba con varias personas empezÃ© a equivocarme y decir las palabras que no eran, por ejemplo, decia reflecciÃ³n en vez de reflejo.	While talking to several people I started to make mistakes and say the wrong words, for example, I said reflection (serious thought) instead of reflection (.	yes	about a bad experience with an employer or teacher.	TuvÃ© un profesor que nunca decÃ­a mi nombre de la manera correcta y una vez lo correjÃ­ y my regaÃ±o.	I had a teacher who never said my name the right way and once I corrected himand scolded him.	yes	P107	great info	No	MT_with_edit	Strongly disagree	Strongly agree	Strongly disagree
611b1d3794ac948af7e57e7a	English	Spanish						English	Spanish			Currently use it, but occasionally	Never Used it	Currently use it, but occasionally	Currently use it, but occasionally	Used it occasionally in the past but have stopped	Currently use it heavily	Never Used it	Currently use it heavily	Used it occasionally in the past but have stopped	Never Used it	Currently use it heavily	Never Used it	I am not sure	Yes	Google translate						Spanish	es	MT with edit	about something funny that happened to you during a meeting.	Hola bueno dias, como estan? Queria contarles de una interaccion chistoso que teni en un reunion del trabajo. Me equivoque los nombres de los dos nuevo jefes y ahora ellos dos siempre me hacen recordar sus nombres cuando los veo.	Hello, good morning, how are you? I wanted to tell you about a funny interaction I had at a work meeting. I got the names of the two new bosses wrong and now the two of them always remind me of their names when I see them.	yes	about a heated argument you recently had with a family member.	Hoy mi mama se puso bravo conmigo cuando yo no sabi ningun sitio web donde ella podria vender unos libros antiguos.	Today my mom got mad at me when I didn't know of any website where she could sell some old books.	yes	P24	Good info	none whatsoever	only_MT	Somewhat agree	Agree	Neutral
611d35b6e792976ec072dccd	English	Spanish						English	Spanish			Used it heavily in the past but have stopped	Used it occasionally in the past but have stopped	Currently use it heavily	Currently use it, but occasionally	Currently use it, but occasionally	Currently use it, but occasionally	Never Used it	Currently use it, but occasionally	Currently use it, but occasionally	Currently use it, but occasionally	Currently use it heavily	Used it heavily in the past but have stopped	Yes	Yes	Google Translate						Spanish	es	Manual	about a bad retail experience you recently had.	Fui a Marshalls para devolver dos cosas. Una camisa que yo compre, y unos pantalones que mi mama habÃ­a comprado. Como yo iba a Marshalls, me traje las dos cosas y los dos recibos. La cajera no parecÃ­a muy amable. Le explique que tenia dos devoluciones separadas, y comencÃ© a pasarle mi recibo primero. Ella se quedo mirÃ¡ndome como si hubiera hecho algo mal. Me dijo, con mala actitud: "No eran d…	I went to Marshalls to return two things. A shirt I bought, and a pair of pants that my mom had purchased. Since I was going to Marshalls, I brought both things with me along with their receipts. The cashier didn't look too friendly. I explained to her that I had two separate returns, and gave her my receipt first. She looked at me like I did something wrong. She said, with a bad attitude: "Isn't…	yes	about a heated argument you recently had with a family member.	Cuando llego mi papa de usar mi carro, entro para decirme que habÃ­a chocado con un pedazo de cemento que tenemos al frente de la casa. Me entro una rabia, porque el siempre pasa por esa parte, y nunca choca con el cemento. Le grite y el se perdono, pero no me importaba.	When my dad got home from using my car, he came in to tell me that he hit a piece of cement that we have in front of our house. I got so mad, because he always passes this area and never hits the cement. I screamed at him, and he apologized, but I didn't care.	yes	P143	Great info	No	manual_translation	Strongly disagree	Disagree	Somewhat disagree
611fd5c03b9654834bd4af0e	English	Arabic						English	Arabic			Currently use it heavily	Never Used it	Currently use it, but occasionally	Used it occasionally in the past but have stopped	Used it heavily in the past but have stopped	Currently use it heavily	Never Used it	Currently use it, but occasionally	Currently use it, but occasionally	Currently use it, but occasionally	Used it heavily in the past but have stopped	Never Used it	I am not sure	Yes	Instagram	Twitter					Arabic	ar	Manual	about an unusal travel experience that you had.	Ù…Ø±Ø­Ø¨Ø© ÙŠØ§ Ø¨ØªØ§Øª. ÙƒÙ†Øª Ø¹Ù„Ù‰ Ø·ÙŠØ§Ø±Ø© Ø¯Ø§Ù„ØªØ© Ù„Ù…Ø§ Ø§Ù„Ø´Ø¨ Ø¬Ù…Ø¨ÙŠ Ø¯Ø§Ø± Ø±Ø§Ø³Ø© Ø¹Ù„Ø§ÙŠ ÙˆØªÙ	Hi ladies. I was on Delta airlines one day and the man next to me turned to me and spit on me.	no	about a heated argument you recently had with a family member.	Ø§Ù…Ø¨Ø§Ø±Ø­ Ø§Ù…ÙŠ Ø³Ø±Ø®Øª Ø¹Ù„Ø§ÙŠ Ø¨Ø¹Ø¯ Ø§Ù„Ø§ÙØ·Ø§Ø± Ø¹Ø´Ø§Ù† Ø§Ù†Ø³ÙŠØª Ø§ÙØ¶ÙŠ Ø§Ù„Ø¬Ù„Ø§Ø¨Ø©. ÙƒÙ†Øª ÙƒØªÙŠØ± Ø²Ø¹Ù„Ø§Ù†Ø© Ù…Ù†Ù‡Ø§ Ø¨Ø¹Ø¯.	Yesterday my mom yelled at me after dinner because I forgot to unload the dishwasher. I was really upset with her after	yes	P191	Great info	no	manual_translation	Strongly disagree	Strongly agree	Strongly disagree
61206e8d3e6a6ccdd064637c	English	Spanish						English	Spanish			Never Used it	Used it occasionally in the past but have stopped	Never Used it	Never Used it	Never Used it	Currently use it heavily	Never Used it	Currently use it, but occasionally	Currently use it, but occasionally	Never Used it	Never Used it	Never Used it	No	Yes	Google						Spanish	es	Only MT	about an unusal travel experience that you had.	En 2001 mi hermano yo fuemos ah la isla de hawaii. Nuestra amiga, Kelly, nos invitaron para quedar dos semanas alli. Lo que me mas sopriendo, era que barato la vacacion era, y que bonito era la isla de Oahu.	In 2001 my brother and I went to the island of Hawaii. Our friend, Kelly, invited us to spend two weeks there. What surprised me the most was how cheap the vacation was, and how beautiful the island of Oahu was.	yes	explaining your opinion about a political controversy.	En mi opinion, el proposiciÃ³n del aborto, es simple. Yo creo que devhiera ser legal, porque los madres, por muchas rasones, no peude o quieree, tener bebes. Yo tamien creo que estan matando un infante, pero la planeta no nesesita mas gente.	In my opinion, the abortion proposition is simple. I think it should be legal, because mothers, for many reasons, cannot or do not want to have babies. I also believe that they are killing an infant, but the planet does not need more people.	yes	P77	good	I think a spell checker would be helpful. The input sees almost everything as misspelled, with the red line under it, and when I misspelled things, I couldn't tell.	MT_with_edit	Agree	Strongly agree	Disagree
612175b1581ff09ff909259c	English	Italian						English	Italian			Never Used it	Currently use it, but occasionally	Currently use it heavily	Currently use it heavily	Used it heavily in the past but have stopped	Currently use it, but occasionally	Never Used it	Never Used it	Used it occasionally in the past but have stopped	Currently use it heavily	Never Used it	Never Used it	Yes	Yes	Google translate						Italian	it	MT with edit	about a bad retail experience you recently had.	Ho comprato un video game su una piattaforma chiamata Etsy. Il gioco non Ã¨ mai arrivato!! Ho inviato messaggi al proprietario del negozio piÃ¹ volte e ancora non ho ricevuto il rimborso. Speriamo bene!	I bought a video game on a platform called Etsy. The game never came!! I have messaged the shop owner multiple times and still haven't received my refund. Let's hope for the best!	yes	about a bad experience with an employer or teacher.	La peggiore esperienza che ho avuto con un insegnante Ã¨ stata quando ho passato molto tempo a scrivere un elaborato e ho ricevuto un brutto voto. Ho parlato piÃ¹ volte con l'insegnante su come correggere il compito, ma penso che non le piaccio.	The worst experience I had with a teacher was when I spent a lot of time writing an essay and got a bad grade. I have talked to the teacher several times about how to correct the assignment, but I think she does not like me.	yes	P73	Great info	No	MT_with_edit	Disagree	Agree	Disagree
612281b8efddd5b0a9096650	English							English				Currently use it, but occasionally	Never Used it	Never Used it	Currently use it heavily	Used it occasionally in the past but have stopped	Currently use it heavily	Never Used it	Currently use it, but occasionally	Used it heavily in the past but have stopped	Never Used it	Never Used it	Never Used it	No	Yes	google translate						Spanish	es	MT with edit	about a funny situation where you were distracted by your mobile phone.	Donde esta la biblioteca?	Where is the library?	yes	about a heated argument you recently had with a family member.	Mi mama no tiene tiempo para cocinar	My mom doesn't have time to cook.	yes	P38	OK	no	MT_with_edit	Disagree	Strongly agree	Disagree
6132ee8283b394e6897d9c36	English							English				Used it occasionally in the past but have stopped	Used it occasionally in the past but have stopped	Currently use it heavily	Used it heavily in the past but have stopped	Currently use it heavily	Currently use it heavily	Used it occasionally in the past but have stopped	Never Used it	Never Used it	Currently use it heavily	Currently use it heavily	Never Used it	I am not sure	Yes	google translate						Korean	ko	MT with edit	about an unusal travel experience that you had.	ë‚´ ì¹œêµ¬ì™€ ë‚˜ëŠ” í•„ë¼ë¸í”¼ì•„ë¡œ ì—¬í–‰ì„ ê°”ê³ ìš°ë¦¬ëŠ” ëº‘ì†Œë‹ˆ ì‚¬ê³ ë¥¼ ë‹¹í–ˆìŠµë‹ˆë‹¤. ê·¸ í›„ ìš°ë¦¬ëŠ” ë°œë › íŒŒí‚¹ì„ ë°›ê³ ë“œëž˜ê·¸ ì‡¼ë¥¼ ë³´ì•˜ìŠµë‹ˆë‹¤. ìž¬ë¯¸ìžˆê³ ì‹ ë‚˜ëŠ” ê²½í—˜ì´ì—ˆìŠµë‹ˆë‹¤.	My friend and I were traveling to Philadelphia and we had a hit and run accident. After that we got valet parking and watched a drag show. It was a fun and exciting experience.	yes	explaining your opinion about a political controversy.	ë‚˜ëŠ” ì „í˜€ ì •ì¹˜ì ì´ì§€ ì•Šë‹¤. ë‚˜ëŠ” ì¼ë°˜ì ìœ¼ë¡œ ì •ì¹˜ì— ëŒ€í•œ ìƒê°ì„ ì‹«ì–´í•˜ë©° ê·¸ê²ƒë„ ì „ì ìœ¼ë¡œ ë‚´ ì¢…êµì  ëª©ì ì— ê·¼ê±°í•©ë‹ˆë‹¤.	I am not political at all. I hate the idea of politics in general, and it's entirely based on my religious purposes.	yes	P163	Great info	n/a	manual_translation	Disagree	Somewhat agree	Neutral
6137d3b8b1252a85f556d3d8	English							English	Spanish	Gujarati		Currently use it, but occasionally	Used it occasionally in the past but have stopped	Currently use it heavily	Used it occasionally in the past but have stopped	Used it occasionally in the past but have stopped	Used it occasionally in the past but have stopped	Never Used it	Never Used it	Never Used it	Currently use it, but occasionally	Currently use it heavily	Currently use it, but occasionally	Yes	Yes	Google Translation						Spanish	es	Manual	about a bad retail experience you recently had.	Fui a Lowes a devolver algunos artÃ­culos que habÃ­a comprado. Hacen recibos por correo electrÃ³nico como una opciÃ³n al pagar y como siempre voy a Lowes, siempre recibo mis recibos por correo electrÃ³nico. Pero no aceptaron mis recibos por correo electrÃ³nico cuando fui a devolver los artÃ­culos y, en cambio, me trataron como si los hubiera robado.\n	I went to Lowes to return some items that I had bought. They do email reciepts as an option when checking out and because I always go to Lowes, I always get my receipts emailed. But they werent accepting my email receipts when I went to go return the items and instead treated me like I stole them.	yes	about a heated argument you recently had with a family member.	Fui a cenar con la familia y empezamos a hablar de negocios. Que siempre me han tratado como a un niÃ±o pequeÃ±o que no sabe nada de negocios. Pero esta vez fue diferente porque tengo mi propio negocio. AsÃ­ que discutimos en el restaurante por el hecho de que yo sabÃ­a mÃ¡s sobre negocios que ellos nunca.\n	I went to go have dinner with family and we started talking about business. Which they have always treated me as a little kid who doesnt know anything about business. But this time it was different because I have my own business. So we got into an argument in the restaurant at the fact that I have realized more about business than they ever have.	yes	P8	interesting	NO, thank you.	manual_translation	Somewhat disagree	Somewhat disagree	Somewhat disagree
614010e2fe2c7bba5f7550d5	English	Filipino						English				Currently use it, but occasionally	Currently use it, but occasionally	Currently use it, but occasionally	Never Used it	Used it occasionally in the past but have stopped	Currently use it heavily	Never Used it	Currently use it heavily	Never Used it	Used it occasionally in the past but have stopped	Used it occasionally in the past but have stopped	Never Used it	Yes	Yes	DeepL						Spanish	es	MT with edit	about a funny situation where you were distracted by your mobile phone.	Yo juego mi telefono. Me tropece. jaja	I play my phone. I stumbled. LOL	yes	explaining your opinion about a political controversy.	Yo no tengo dinero. Yo soy triste. :(	I do not have money. I am sad. :(	yes	P98	not a good info	No trouble	only_MT	Somewhat agree	Agree	Somewhat agree
6145a88c94a2c86532d36b0f	English	Spanish						English	Spanish			Currently use it, but occasionally	Used it occasionally in the past but have stopped	Currently use it heavily	Currently use it, but occasionally	Used it heavily in the past but have stopped	Currently use it heavily	Never Used it	Currently use it heavily	Never Used it	Never Used it	Used it occasionally in the past but have stopped	Used it occasionally in the past but have stopped	Yes	Yes	google translate						Spanish	es	Only MT	about an unusal travel experience that you had.	Mi primer viaje a MÃ©xico cuando era solo un niÃ±o fue muy revelador cuando me encontrÃ© con muchas personas trabajando en las calles vendiendo productos y siendo tan persistentes en seguir el automÃ³vil y golpear el vidrio para empujar el producto.\n	My first trip to Mexico when I was just a child was very revealing when I met many people working on the streets selling products and being so persistent in following the car and hitting the glass to push the product.\n	yes	about a bad experience with an employer or teacher.	Mi maestro fue muy poco profesional y perezoso al dejar la clase para estudiar por su cuenta y aprender el material por sÃ­ mismos mientras navegaba por Internet e incluso llegaba tarde a la clase.\n	My teacher was very unprofessional and lazy to leave the class to study on their own and learn the material by themselves while browsing the internet and even being late for class.\n	yes	P226	Good	no	only_MT	Somewhat agree	Agree	Somewhat disagree
6148dc3549155e9222aee13b	English							English	Spanish			Used it occasionally in the past but have stopped	Used it occasionally in the past but have stopped	Currently use it heavily	Currently use it, but occasionally	Currently use it, but occasionally	Currently use it heavily	Currently use it, but occasionally	Currently use it, but occasionally	Currently use it, but occasionally	Currently use it, but occasionally	Currently use it, but occasionally	Never Used it	Yes	Yes	Google translate	iTranslate	DeepL	Babylon			Japanese	ja	Manual	"about a funny situation where you were distracted by your mobile phone."	"å…ˆæ—¥ã€Androidå‘ã‘ã«ç™ºå£²ã•ã‚ŒãŸæ–°ã—ã„ãƒ­ã‚±ãƒƒãƒˆãƒªãƒ¼ã‚°ã®ãƒ¢ãƒã‚¤ãƒ«ã‚²ãƒ¼ãƒ ã‚’ã‚¯ãƒ©ã‚¹ã§ãƒ—ãƒ¬ã‚¤ã—ã¦ã„ã¾ã—ãŸã€‚ç§ã¯ã‚²ãƒ¼ãƒ ã«ã¨ã¦ã‚‚å¤¢ä¸­ã«ãªã‚Šã€ã“ã®æ•°å­¦ã‚³ãƒ¼ã‚¹ã®å…ˆç”Ÿã¯ç§ã«æ°—ä»˜ã‹ãšã«2å›žç§ã‚’å‘¼ã‚“ã ã€‚"	"The other day I was in class playing the new rocket league mobile game that had come out for Android. I was so enamored with the game, the teacher of this math course called on me twice, without me noticing at all."	yes	"explaining your opinion about a political controversy."	"æ”¿æ²»ã‚’è¦‹ã‚‹ã¨ãã€ç§ã¯é–¢ä¸Žã—ãªã„ã€ã¾ãŸã¯ã¾ã£ãŸãèˆˆå‘³ãŒãªã„ã¨ã„ã†å“²å­¦ã‚’å¥½ã¿ã¾ã™ã€‚ç§ã«ã¨ã£ã¦ã€æ”¿æ²»ã¯ã™ã¹ã¦æ™‚é–“ã®ç„¡é§„ã‚’å¸ã†å·¨å¤§ãªæ³¨ç›®ã§ã‚ã‚Šã€åŒæ–¹ã¯ã»ã¨ã‚“ã©åŒã˜ã‚ˆã†ã«æ‚ªãã€èˆžå°è£ã§æ‚ªæ„ã®ã‚ã‚‹æ–¹æ³•ã§å”åŠ›ã—ã¦ã„ã¾ã™ã€‚"	"When viewing politics, I prefer the philosophy of not getting involved or being interested at all. To me politics is all a giant attention sucking waste of time game, and both sides are mostly equally bad and work together behind the scenes in nefarious ways."	yes	P20	Great info	No.	manual_translation	Neutral	Neutral	Somewhat agree
614a8bf9dbbb5293fd3b63ab	English	Tamil						English	Tamil			Currently use it, but occasionally	Used it occasionally in the past but have stopped	Currently use it, but occasionally	Currently use it, but occasionally	Currently use it, but occasionally	Currently use it heavily	Never Used it	Currently use it heavily	Used it occasionally in the past but have stopped	Never Used it	Currently use it heavily	Never Used it	Yes	Yes	Google Translate						Tamil	ta	MT with edit	about a funny situation where you were distracted by your mobile phone.	à®Žà®©à®¤à¯ à®¤à¯Šà®²à¯ˆà®ªà¯‡à®šà®¿à®¯à®¿à®²à¯ à®¨à®¾à®©à¯ à®®à®¿à®•à®µà¯à®®à¯ à®¤à®¿à®šà¯ˆà®¤à®¿à®°à¯à®ªà¯à®ªà®ªà¯à®ªà®Ÿà¯à®Ÿà¯‡à®©à¯, à®¨à®¾à®©à¯ à®•à®¿à®Ÿà¯à®Ÿà®¤à¯à®¤à®Ÿà¯à®Ÿ à®ªà¯à®²à¯ à®®à¯€à®¤à¯ à®¤à®Ÿà¯à®®à®¾à®±à®¿à®µà®¿à®Ÿà¯à®Ÿà¯‡à®©à¯.\n	I was so distracted on my phone that I almost stumbled on the grass.\n	yes	explaining your opinion about a political controversy.	à®ªà®°à¯à®µà®¨à®¿à®²à¯ˆ à®®à®¾à®±à¯à®±à®•à¯ à®•à¯Šà®³à¯à®•à¯ˆ à®…à®°à®šà®¿à®¯à®²à¯ à®šà®°à¯à®šà¯à®šà¯ˆà®¯à®¾à®• à®‡à®°à¯à®•à¯à®•à®•à¯ à®•à¯‚à®Ÿà®¾à®¤à¯.\n	Climate change policy should not be a political controversy.\n	yes	P218	good	N/A	MT_with_edit	Somewhat disagree	Somewhat agree	Neutral
614becce61f2753af92727bb	English							English				Used it occasionally in the past but have stopped	Currently use it heavily	Currently use it heavily	Used it occasionally in the past but have stopped	Never Used it	Currently use it heavily	Never Used it	Currently use it, but occasionally	Never Used it	Currently use it heavily	Never Used it	Never Used it	Yes	Yes	google translate						Spanish	es	Only MT	about an unusal travel experience that you had.	Fui de viaje a un rancho para turistas el aÃ±o pasado y estaba pescando temprano en la maÃ±ana. Era mediados de agosto, por lo que el clima era muy hÃºmedo y aproximadamente 2 horas despuÃ©s de pescar, aparecieron estas enormes nubes de tormenta. Hubo fuertes truenos y relÃ¡mpagos en todo el lago. Inmediatamente salÃ­ del agua en el bote en el que estaba. No hace falta decir que estuvo muy cerca.	I went on a trip to a tourist ranch last year and was fishing early in the morning. It was the middle of August so the weather was very wet and about 2 hours after fishing these huge storm clouds appeared. There was loud thunder and lightning throughout the lake. I immediately got out of the water in the boat I was in. Needless to say, it was very close.	yes	about a bad experience with an employer or teacher.	SolÃ­a â€‹â€‹trabajar en una oficina de prÃ©stamos hipotecarios y estaba tan harto de mi jefe. Literalmente le dije que lo empujara donde el sol no brilla y salÃ­.\n\n	I used to work in a home loan office and I was so sick of my boss. I literally told him to push it where the sun doesn't shine and walked out.\n\n	yes	P203	Good	no nothing at all	MT_with_edit	Agree	Somewhat agree	Disagree
614d673e3a5fd5cb2b5b6eb7	English	Sign language						English				Currently use it, but occasionally	Currently use it, but occasionally	Currently use it, but occasionally	Never Used it	Currently use it, but occasionally	Currently use it heavily	Never Used it	Currently use it, but occasionally	Currently use it, but occasionally	Currently use it, but occasionally	Currently use it heavily	Never Used it	I am not sure	Yes	Google translate						French	fr	Only MT	about an unusal travel experience that you had.	Une fois, j'Ã©tais en Floride pour mon seiziÃ¨me anniversaire avec mon meilleur ami qui avait aussi cet Ã¢ge Ã la mÃªme Ã©poque. Nous traÃ®nions dans la piscine et ces gars allemands BEAUCOUP plus Ã¢gÃ©s sont venus et ont essayÃ© de nous draguer et c'Ã©tait en fait assez effrayant parce qu'ils nous suivaient juste le reste du temps.	Once I was in Florida for my sixteenth birthday with my best friend who was also that age at the same time. We were hanging out in the pool and these MUCH older German guys came over and tried to hit on us and it was actually pretty scary because they were just following us the rest of the time.	yes	about a bad experience with an employer or teacher.	J'ai rÃ©cemment quittÃ© un emploi dans un hÃ´pital psychiatrique et j'ai eu de nombreuses mauvaises expÃ©riences avec le personnel, mais celle qui s'est dÃ©marquÃ©e a Ã©tÃ© lorsque je suivais une formation "main Ã main". C'Ã©tait essentiellement une faÃ§on Ã trÃ¨s petit budget pour l'hÃ´pital de nous former Ã nous protÃ©ger contre les patients. Pendant cette pÃ©riode, j'ai reÃ§u plusieurs comment…	I recently left a job at a psychiatric hospital and had many bad experiences with the staff, but the one that stood out was when I was doing "hands on" training. It was basically a very low-budget way for the hospital to train us to protect ourselves from patients. During this time I received several inappropriate comments about my short stature and this continued from every member of staff for t…	yes	P93	Great info	nope!	only_MT	Neutral	Agree	Somewhat disagree
614e64473e9073bb219b270d	English	German						English				Currently use it, but occasionally	Currently use it, but occasionally	Currently use it, but occasionally	Never Used it	Never Used it	Currently use it heavily	Never Used it	Currently use it, but occasionally	Currently use it, but occasionally	Used it occasionally in the past but have stopped	Used it occasionally in the past but have stopped	Never Used it	Yes	Yes	google translate						German	de	MT with edit	about something funny that happened to you during a meeting.	Irgendein Dummkopf kam ungebeten in ein Meeting.\nWir fragten ihn: "Bist du verloren?"\nEr antwortete: â€žIch weiÃŸ, wo ich bin, aber ich weiÃŸ nicht, wo du bist.\n"	Some dummy walked into a meeting uninvited.\nWe asked him: "Are you lost?"\nHe replied, "I know where I am, but I don't know where you are.\n"	yes	about a bad experience with an employer or teacher.	Ein alter Schullehrer beschimpfte mich, unverdient, weil ich zu spÃ¤t zum Unterricht kam.\nEr hatte vergessen, dass ich eine vorherige Genehmigung hatte, weil ich mich mit dem Schulleiter wegen einer Preisverleihung traf, zu der ich gebeten wurde.\nSelbst nachdem ich ihn daran erinnert hatte, dass es sich um eine entschuldigte Abwesenheit handelte, weigerte er sich, sich zu entschuldigen.\nDanach…	An old school teacher berated me, undeservedly, for being late for class.\nHe had forgotten that I had prior approval because I was meeting with the principal for an awards ceremony I was asked to attend.\nEven after I reminded him that it was an excused absence, he refused to apologize.\nAfter that we never had a good relationship again.	yes	P136	Great info	no	MT_with_edit	Agree	Agree	Disagree
614f22dfa54d9361b45c3052	English	Spanish						English	Spanish			Currently use it, but occasionally	Currently use it, but occasionally	Currently use it, but occasionally	Used it occasionally in the past but have stopped	Never Used it	Currently use it heavily	Never Used it	Currently use it, but occasionally	Never Used it	Used it occasionally in the past but have stopped	Never Used it	Never Used it	I am not sure	Yes	Google						Spanish	es	Only MT	about a bad retail experience you recently had.	Hoy comi en un cafe nuevo. Me gusto mucho. El cafe estaba muy bien hecho!	Today I ate in a new cafe. I loved it. The coffee was very well done!	yes	explaining your opinion about a political controversy.	La guerra en Ukrania es un ejemplo de los hechos criminales de Putin. El y Trump son la misma cosa. Una familia de hijo de putas.	The war in Ukraine is an example of Putin's criminal deeds. He and Trump are the same thing. A family of motherfuckers.	yes	P169	Great info	No, it actually was surprisingly good.	MT_with_edit	Somewhat disagree	Agree	Somewhat disagree
615001d094ff3a75f45b36b0	English							English	Chinese			Currently use it heavily	Currently use it heavily	Currently use it, but occasionally	Used it occasionally in the past but have stopped	Never Used it	Currently use it heavily	Currently use it heavily	Currently use it heavily	Never Used it	Currently use it, but occasionally	Never Used it	Currently use it heavily	Yes	Yes	Google Translate						Chinese	zh-CN	Only MT	about a bad retail experience you recently had.	æœ€è¿‘ï¼Œæˆ‘æƒ³ä»Žç½‘ä¸Šä¹°ä¸€äº›çº¸èƒ¶å¸¦ï¼Œä½†å–å®¶æ˜¾ç„¶æ²¡æœ‰å‘Šè¯‰æˆ‘ä»–ä»¬è¶…å–äº†ï¼Œå¹¶å‡è£…ä»–ä»¬æ²¡æœ‰å‘è´§ã€‚	Recently, I was trying to buy some washi tape off the Internet, but the seller apparently didn't tell me they were oversold and pretended they didn't ship it.	yes	explaining your opinion about a political controversy.	æˆ‘è®¤ä¸ºå •èƒŽåœ¨æ‰€æœ‰å·žéƒ½åº”è¯¥æ˜¯åˆæ³•çš„ã€‚å¥³äººçš„èº«ä½“æ˜¯å¥¹è‡ªå·±çš„ï¼Œå¥¹åº”è¯¥èƒ½å¤Ÿåšå‡ºé€‰æ‹©ã€‚	I think abortion should be legal in all states. A woman's body is her own and she should be able to make choices.	yes	P31	Great info	no	MT_with_edit	Agree	Somewhat agree	Somewhat disagree
615001d094ff3a75f45b36b0	English							English	Chinese			Currently use it heavily	Currently use it heavily	Currently use it, but occasionally	Used it occasionally in the past but have stopped	Never Used it	Currently use it heavily	Currently use it heavily	Currently use it heavily	Never Used it	Currently use it, but occasionally	Never Used it	Currently use it heavily	Yes	Yes	Google Translate						Chinese	zh-CN	Only MT	about a bad retail experience you recently had.	æœ€è¿‘ï¼Œæˆ‘æƒ³ä»Žç½‘ä¸Šä¹°ä¸€äº›çº¸èƒ¶å¸¦ï¼Œä½†å–å®¶æ˜¾ç„¶æ²¡æœ‰å‘Šè¯‰æˆ‘ä»–ä»¬è¶…å–äº†ï¼Œå¹¶å‡è£…ä»–ä»¬æ²¡æœ‰å‘è´§ã€‚	Recently, I was trying to buy some washi tape off the Internet, but the seller apparently didn't tell me they were oversold and pretended they didn't ship it.	yes	explaining your opinion about a political controversy.	æˆ‘è®¤ä¸ºå •èƒŽåœ¨æ‰€æœ‰å·žéƒ½åº”è¯¥æ˜¯åˆæ³•çš„ã€‚å¥³äººçš„èº«ä½“æ˜¯å¥¹è‡ªå·±çš„ï¼Œå¥¹åº”è¯¥èƒ½å¤Ÿåšå‡ºé€‰æ‹©ã€‚	I think abortion should be legal in all states. A woman's body is her own and she should be able to make choices.	yes	P9	good	no	MT_with_edit	Agree	Somewhat agree	Somewhat disagree
6151e70a336a52b8af712d41	English							English				Used it occasionally in the past but have stopped	Used it occasionally in the past but have stopped	Never Used it	Never Used it	Never Used it	Currently use it, but occasionally	Never Used it	Never Used it	Used it occasionally in the past but have stopped	Never Used it	Never Used it	Never Used it	No	Yes	translate.google.com						German	de	MT with edit	about an unusal travel experience that you had.	Ich hatte eine Musikprobe heute gemacht mit einem Freund von mir. Es war super Spass! Wir hatten vier neue Lieder gespielt.	I had a music rehearsal today with a friend of mine. It was super fun! We had played four new songs.	yes	about a heated argument you recently had with a family member.	Meine Frau und ich hatte heute ein wenig Streit gehabt. Es war ein misverstandnis Ã¼ber die meinung ein Netflix program. Ganz blÃ¶d. Was fÃ¼r a Dummheit war das.	My wife and I had a bit of a fight today. There was a misunderstanding about the meaning of a Netflix program. Totally stupid. What stupidity was that.	yes	P54	ok	No problems, it all went well.	MT_with_edit	Strongly disagree	Strongly agree	Strongly disagree
615251a465f058e211cfbbb8	English	Spanish	German					English	Spanish	French	German	Currently use it, but occasionally	Currently use it, but occasionally	Used it occasionally in the past but have stopped	Used it occasionally in the past but have stopped	Used it occasionally in the past but have stopped	Currently use it, but occasionally	Used it occasionally in the past but have stopped	Currently use it, but occasionally	Currently use it, but occasionally	Currently use it, but occasionally	Never Used it	Used it occasionally in the past but have stopped	Yes	Yes	Google Translate						Spanish	es	MT with edit	about a funny situation where you were distracted by your mobile phone.	Estaba tratando de organizar un alquiler de vacaciones en Austria con un propietario que solo hablaba alemÃ¡n. En medio de la conversaciÃ³n con el propietario, recibÃ­ un mensaje de texto en inglÃ©s. Sin darme cuenta, cambiÃ© a inglÃ©s. Me tomo varias frases antes de que me diera cuenta de que mi posible arrendador no tenÃ­a ni idea de lo que estaba diciendo.	I was trying to arrange a vacation rental in Austria with an landlord who only spoke German. In the middle of the conversation with the owner, I received a text message in English. Without realizing it, I switched to English. It took me several sentences before I realized that my prospective landlord had no idea what I was saying.	yes	explaining your opinion about a political controversy.	EnvÃ­o muchos mensajes de texto a los votantes que habla espaÃ±ol. Estoy constantemente horrorizado por la virulencia contra el derecho a decidir que algunos votantes reciben de sus pÃ¡rrocos. Parece que una vez que a una persona le lavan el cerebro, es muy difÃ­cil hacer que entre en razÃ³n.	I send a lot of text messages to voters who speak Spanish. I am constantly horrified by the virulence against the right to choose that some voters receive from their parish priests. It seems that once a person is brainwashed, it is very difficult to bring him to his senses.	yes	P216	Great info	No	MT_with_edit	Strongly disagree	Somewhat agree	Strongly disagree
6152baaee07bc0fe95137cac	English	Chinese						English	Chinese			Used it occasionally in the past but have stopped	Used it occasionally in the past but have stopped	Currently use it, but occasionally	Used it occasionally in the past but have stopped	Used it occasionally in the past but have stopped	Currently use it heavily	Currently use it heavily	Used it heavily in the past but have stopped	Currently use it, but occasionally	Currently use it, but occasionally	Never Used it	Used it heavily in the past but have stopped	No	Yes	Google Translate						Chinese	zh-CN	Only MT	about something funny that happened to you during a meeting.	æ˜¥å¤©ä¹°å®½å¸¦\nå¤å¤©åŽ»ä¹°ç“œ\nå†¬å¤©é›¶å…ƒè´­\nå†¬å¤©å–é¸¡æ±¤	buy broadband in spring\nbuy melon in summer\nzero yuan in winter\nchicken soup in winter	yes	about a heated argument you recently had with a family member.	é¾Ÿä¹Ÿå…ˆç”Ÿï¼Œå¤©çš‡é™›ä¸‹ï¼Œæˆ‘æ»´ä»»åŠ¡å®Œæˆäº†ï¼å•Šå“ˆå“ˆå“ˆå“ˆã€‚å¥¶å¥¶æ»´ï¼Œç»™æˆ‘çŽ©é˜´çš„æ˜¯å§ï¼Œç›´æŽ¥æ¥å§ï¼	Mr. Kamiya, His Majesty the Emperor, I have completed my mission! Ahahahaha. Grandma, give me a yin, right? Come on!	yes	P46	confusing response, may not understand prompt clearly or didn't respond according to prompt		MT_with_edit	Neutral	Somewhat agree	Neutral
615eddb82c272bfc2abe6904	English	German						English	German			Used it occasionally in the past but have stopped	Currently use it, but occasionally	Currently use it, but occasionally	Never Used it	Used it occasionally in the past but have stopped	Currently use it heavily	Never Used it	Currently use it heavily	Never Used it	Currently use it heavily	Currently use it heavily	Used it occasionally in the past but have stopped	Yes	Yes	Google translate						German	de	MT with edit	about something funny that happened to you during a meeting.	Da war ich also, erzÃ¤hlte einem Kollegen eine Geschichte, und ein Mann fiel von der Decke, direkt auf seinen RÃ¼cken, sah uns an und sagte: "Hallo Leute, habt ihr ein Licht (Feuerzeug)?" Mein Kollege und ich waren so hin und her geworfen von der Situation, dass wir nur lachten, den Mann aufhoben und ihn auf den Weg schickten.	So there I was, telling a colleague a story, and a man fell off the ceiling, right on his back, looked at us and said, "Hi guys, do you have a candle (lighter)?" My colleague and I were so upset by the situation that we just laughed, picked the man up and sent him on his way.	yes	about a heated argument you recently had with a family member.	Also waren meine Tante und ich auf dem Weg, meine Mutter vom Flughafen abzuholen, und wir hatten VerspÃ¤tung, weil meine Tante verschlafen hatte. Wir waren ungefÃ¤hr zwei, vielleicht drei Stunden zu spÃ¤t, um meine Mutter abzuholen, und als wir endlich ankamen Am Flughafen finden wir heraus, dass das Flugzeug meiner Mutter einen Triebwerksschaden hatte und den Flug gewechselt hat, sodass wir gena…	So my aunt and I were on our way to pick up my mother from the airport and we were delayed because my aunt overslept. We were about two maybe three hours late to pick up my mom and when we finally got to the airport we find out that my mom's plane had an engine failure and changed flights so she got to the airport just when we did.	yes	P42	good	The translation was a bit rough but it was close enough to the main point.	MT_with_edit	Strongly disagree	Agree	Strongly disagree
6165f979b7d01ad3c05bb18f	English	Spanish						English				Used it occasionally in the past but have stopped	Currently use it heavily	Currently use it heavily	Currently use it, but occasionally	Currently use it heavily	Currently use it, but occasionally	Never Used it	Used it occasionally in the past but have stopped	Never Used it	Currently use it, but occasionally	Currently use it heavily	Used it occasionally in the past but have stopped	Yes	No							Spanish	es	Manual	about something funny that happened to you during a meeting.	Hola, Hoy yo estaba en un meeting y la persona alado mio se tiro un peo, apestaba mucho, Todos tienamos que salir del cuarto.	Hello, Today I was in a meeting and the person next to me farted, it smelled bad, all of us had to leave the room.	yes	about a heated argument you recently had with a family member.	Yo estoy enojada con mi hermano, El me dijo que yo era estupida.	I am so mad at my brother, he told me I was stupid.	yes	P206	good	Nope	manual_translation	Strongly disagree	Strongly agree	Strongly disagree
6167206f242b144689a752d3	English	Spanish						English				Used it heavily in the past but have stopped	Used it heavily in the past but have stopped	Currently use it, but occasionally	Currently use it, but occasionally	Currently use it, but occasionally	Currently use it, but occasionally	Never Used it	Currently use it, but occasionally	Currently use it, but occasionally	Currently use it, but occasionally	Currently use it heavily	Used it occasionally in the past but have stopped	Yes	Yes	google translate						Spanish	es	Manual	about a bad retail experience you recently had.	Recientemente fui a Wendy's con mi abuela, y cuando ordene tardaron diez minutos para atenderme y tomar mi orden. De ahi me dio la orden equivocada y esta frÃ­a.	I recently went to Wendy's with grandmother, and when I ordered they took 10 minutes to attend me and take my order. After that they gave me a wrong order and it was cold.	yes	about a heated argument you recently had with a family member.	hace unos dias yo y mi abuelita peleamos sobre mi nuevo perro que traje a la casa. Ella estaba disgustada porque el no esta entrenado todavÃ­a para ir al baÃ±o. Debido a eso esta causando muchos problemas.	A few days ago me and my grandmother fought over my new dog that I brought home. She was very upset because the puppy is not trained to go to the restroom. Due to this this has caused many problems.	yes	P190	Great info	no	manual_translation	Agree	Agree	Neutral
61692abb0f3acf7a49d91533	English	Spanish	tagalog					English				Currently use it, but occasionally	Used it occasionally in the past but have stopped	Used it occasionally in the past but have stopped	Never Used it	Currently use it, but occasionally	Currently use it heavily	Never Used it	Currently use it, but occasionally	Never Used it	Never Used it	Currently use it heavily	Currently use it heavily	Yes	Yes	Google Translate						Spanish	es	Only MT	about something funny that happened to you during a meeting.	5 minutos en la reunion, y el jefe derrama su cafe en los documentos del trabajo. hahaha final the la storia la reunion esta cancelada!	5 minutes into the meeting, and the boss spills his coffee on the work documents. hahaha end of the story the meeting is cancelled!	no	explaining your opinion about a political controversy.	La controversia politica es una tonteria en nuestro estado actual. Los dos lados hacen lo que quieren no hay differencia actual entre los dos partidos politicos.	Political controversy is nonsense in our current state. The two sides do what they want there is no actual difference between the two political parties.	yes	P210	Good info	No everything worked	MT_with_edit	Somewhat disagree	Agree	Somewhat disagree
616f47684ddc73c437a74a6c	English	Spanish						English	Spanish			Never Used it	Never Used it	Currently use it, but occasionally	Currently use it, but occasionally	Never Used it	Currently use it, but occasionally	Never Used it	Currently use it, but occasionally	Never Used it	Currently use it, but occasionally	Currently use it, but occasionally	Currently use it, but occasionally	Yes	Yes	google translate						Spanish	es	MT with edit	about a funny situation where you were distracted by your mobile phone.	Estaba en el mercado buscando cupones en mi bolso y no me di cuneta que tenia el volumen de mi cellular en alta voz y estaba una pelicula de Netflix y se escuchaba griteria y un tiroteo.	I was in the market looking for coupons in my bag and I didn't realize that I had the volume of my cell phone on high and there was a movie playing on my Netflix app and there was screaming and gunshots.	yes	about a heated argument you recently had with a family member.	El tema de la politica nunca falta en la mesa de el Hispano. Ya se imagina donde termino? Los problemas de este pais, todos a los democratas. Mis padres estan convencido que a Estado Unidos le falta poco para pareser a Cuba. Todos dijustados, y al final nada se resolvio, lo tipico.	The topic of politics is never missing from the table of Hispanics. Can you imagine how it ended up? The problems of this country, all to the democrats. My parents are convinced that the United States is close to becoming like Cuba. All upset, and in the end nothing was resolved, the typical situation.	yes	P34	Great info	n/a	MT_with_edit	Strongly disagree	Strongly agree	Strongly disagree
616f4e920ed4bf68c708dde3	English	Spanish						English	Spanish			Currently use it, but occasionally	Currently use it heavily	Currently use it, but occasionally	Currently use it, but occasionally	Never Used it	Currently use it heavily	Never Used it	Currently use it heavily	Used it occasionally in the past but have stopped	Used it occasionally in the past but have stopped	Never Used it	Never Used it	Yes	Yes	google translate						Spanish	es	MT with edit	about an unusal travel experience that you had.	Ayer intentamos cruzar la frontera en el puente internacional de Laredo. El trÃ¡fico fue horrible, y mi hijo tenÃ­a que hacer pipi en una botella. Al mismo tiemp, un soldado del ejÃ©rcito nos acerco para ver que onda. Que verguenza!	Yesterday we tried to cross the border on the international bridge in Laredo. The traffic was horrible, and my son had to pee in a bottle. At the same time, a soldier approached us to see what was going on. What an embarrassment!	yes	about a bad experience with an employer or teacher.	Hace unos aÃ±os trabajÃ© en una primaria. Mi jefa fue la director mÃ¡s horrible de toda mi experiencia profesional. Ella tenÃ­a celos y me acusÃ³ de conspirar en contra de ella para que quedarme con su puesto. Ni siquiera tenÃ­a mi licencia de administraciÃ³n, solamente mi licencia de maestra. Ella me prohibiÃ³ hablar con mis compaÃ±eros del trabajo, no me dejo salir de mi oficina, y no me dio mi…	A few years ago I worked in a primary school. My boss was the most horrible manager in my entire professional experience. She was jealous and accused me of plotting against her to get her job. I didn't even have my administration license, just my teaching license. She forbade me to talk to my co-workers, wouldn't let me leave my office, and didn't give me my lunch break. It was the most horrible …	yes	P209	Great info	No, it was great! I enjoyed it!	MT_with_edit	Strongly disagree	Strongly agree	Strongly disagree
6176265d71713088623414f3	English	Spanish						English	Spanish			Currently use it heavily	Used it heavily in the past but have stopped	Currently use it heavily	Currently use it heavily	Currently use it heavily	Currently use it, but occasionally	Never Used it	Currently use it, but occasionally	Currently use it, but occasionally	Never Used it	Currently use it heavily	Never Used it	Yes	Yes	HelloTalk						Spanish	es	MT with edit	about something funny that happened to you during a meeting.	Cuando estaba en una reunion no esaba silenciada y estaba hablando con mis gatos. Y estaba hablando como si estuviera hablando con una bebe y todos en la reunion se echaron a reir. Me dio mas verguenza y cerre mi computador jaja	When I was in a meeting I wasn't muted and I was talking to my cats. And I was talking like I was talking to a baby and everyone in the meeting started laughing. It made me super embarrassed and I closed my computer haha	yes	explaining your opinion about a political controversy.	Las personas transgenero merecen derechos. No hay discussion. Siguen siendo personas merecen la felicidad.	Transgender people deserve rights. There is no discussion. They are still people and deserve happiness.	yes	P215	Great info	No	MT_with_edit	Strongly disagree	Strongly agree	Strongly disagree
61f2acbaa09e72f23cbaf6e1	English	Spanish						English	Spanish			Used it occasionally in the past but have stopped	Used it heavily in the past but have stopped	Used it heavily in the past but have stopped	Used it heavily in the past but have stopped	Used it occasionally in the past but have stopped	Currently use it heavily	Used it occasionally in the past but have stopped	Currently use it heavily	Used it occasionally in the past but have stopped	Currently use it, but occasionally	Currently use it heavily	Used it occasionally in the past but have stopped	Yes	Yes	Google Translate						Spanish	es	MT with edit	about an unusal travel experience that you had.	Cuando estaba de mochilero por Europa conocÃ­ a una chica de Argentina y terminamos viajando juntos a un par de ciudades. Cuando llegamos a Praga, habÃ­a un aguacero. Caminamos hasta nuestro albergue y, cuando entramos, solo quedaban dos camas, en un cuarto con otro chico. Aparentemente, el chico no estaba, y decidimos ir a ducharnos y cambiarnos la ropa mojada. Fuimos estÃºpidos y no guardamos b…	When I was backpacking in Europe I met a girl from Argentina and we ended up traveling to a couple of cities together. When we arrived in Prague, there was a downpour. We walked to our hostel and when we walked in there were only two beds left, in a room with another boy. Apparently, the boy wasn't there, and we decided to go take a shower and change out of our wet clothes. We were stupid and did…	yes	about a bad experience with an employer or teacher.	Me dio menos horas, porque las mujeres "mayores" con las que trabajaba estaban molestas porque una joven novata ganaba mÃ¡s dinero que ellas. No hace falta decir que me fui poco despuÃ©s.	He gave me fewer hours, because the "older" women I worked with were upset that a young rookie was making more money than they were. Needless to say, I left shortly after.	yes	P152	good info	No.	MT_with_edit	Somewhat disagree	Somewhat agree	Disagree
61fa9015d42cb19beec4905e	English							English	Pidgin			Currently use it, but occasionally	Currently use it, but occasionally	Currently use it heavily	Currently use it heavily	Currently use it, but occasionally	Currently use it, but occasionally	Used it occasionally in the past but have stopped	Never Used it	Currently use it, but occasionally	Used it occasionally in the past but have stopped	Currently use it, but occasionally	Never Used it	I am not sure	Yes	Google Translator	Instagram					Yoruba	yo	Manual	about something funny that happened to you during a meeting.	Mo n se ipade pelu oga mi, iyawo re si wa pelu wa nibi ipade fun igba akoko, aisan aisan ni mi ni akoko yen, Sugbon mo le jade. Iyawo oga mi so nkan apanilerin mo si bu rerin, lesekese catarrh subu lati imu mi. O je gan didamu ati ki o funny.	I was meeting my boss, and his wife was with us at the meeting for the first time, I was sick at the time, but I could go out. My master's wife said something funny and I laughed, immediately catarrh fell from my nose. It was really embarrassing and funny.	yes	about a bad experience with an employer or teacher.	Mo wa ni ile-iwe igbimá» ile-áº¹ká» giga, Mo ti páº¹ lakoko apejá» á¹£ugbá»n fun idi ti o dara, Mo n ni owurá» áº¹ru páº¹lu ikun mi dun. Mo gbiyanju lati á¹£alaye á¹£ugbá»n ko gbá», O nÃ mi pupá» pupá» ati pe gbogbo ohun ti Mo le ni áº¹kun.	I was in high school boarding school, I was late during the conference but for good reason, I was having a terrible morning with my stomach aching. I tried to explain but did not listen, It hit me a lot and everything I could cry.	yes	P11	catarrh didn't get translated	Nothing went wrong in the experiment	manual_translation	Neutral	Agree	Neutral
622bad232b20c321c9a35bef	English	Twi						English				Used it heavily in the past but have stopped	Currently use it, but occasionally	Used it occasionally in the past but have stopped	Currently use it heavily	Used it occasionally in the past but have stopped	Currently use it heavily	Never Used it	Used it heavily in the past but have stopped	Used it occasionally in the past but have stopped	Never Used it	Currently use it, but occasionally	Never Used it	No	Yes	Google translator						German	de	Only MT	about something funny that happened to you during a meeting.	Das Thema Social Media ist meiner Meinung nach ein besonderes. Einerseits hat es den Stimmlosen eine Stimme gegeben, andererseits ist es so stark, dass die Wirkung seines Missbrauchs beÃ¤ngstigend ist. ziemlich viele arrogante Fehlinformationen im Gange.\n\n	In my opinion, the subject of social media is a special one. On the one hand it has given voice to the voiceless, on the other hand it is so powerful that the effects of its abuse are frightening. quite a bit of arrogant misinformation afoot.\n\n	yes	explaining your opinion about a political controversy.	Der Fall des Russisch-Ukraine-Krieges ist einfach so traurig anzusehen. es gibt keine Gewinner in dieser Situation. die russen wollen das nicht und die ukrainer haben ihre heimat verloren. nur Putin scheint sich zu amÃ¼sieren.	The fall of the Russo-Ukraine war is just so sad to watch. there are no winners in this situation. the russians don't want that and the ukrainians have lost their homeland. only Putin seems to be enjoying himself.	yes	P74	ok	No. Everything was fine	only_MT	Agree	Somewhat agree	Agree
62349b0eeb2cf55d1fa87ccf	English	Spanish						English	Spanish			Never Used it	Used it heavily in the past but have stopped	Never Used it	Currently use it, but occasionally	Used it occasionally in the past but have stopped	Currently use it heavily	Never Used it	Currently use it heavily	Never Used it	Never Used it	Never Used it	Never Used it	No	Yes	google translate						Spanish	es	Only MT	about a funny situation where you were distracted by your mobile phone.	estaba caminando por la calle, no puse attencion y un carro casi me choco	I was walking down the street, I didn't pay attention and a car almost hit me	yes	about a heated argument you recently had with a family member.	Mi hermano no tiene trabajo y nunca paga renta. le dije hoy es el dia que encuentras trabajo para pagarme. se puso enojado y le tire fuera de la casa.	My brother doesn't have a job and never pays rent. I told him today is the day you find a job to pay me. he got angry and threw him out of the house.	yes	P193	Great info	everything was very good	only_MT	Somewhat agree	Strongly agree	Somewhat agree
6234ae5324f1a9400a95f909	English	Chinese						English	Chinese			Used it occasionally in the past but have stopped	Currently use it, but occasionally	Currently use it, but occasionally	Never Used it	Never Used it	Currently use it heavily	Currently use it, but occasionally	Currently use it heavily	Never Used it	Currently use it, but occasionally	Never Used it	Never Used it	Yes	Yes	Google Translate						Chinese	zh-CN	Only MT	about an unusal travel experience that you had.	å¤§å®¶å¥½ï¼Œ æˆ‘ä»Šå¤©æƒ³ä»‹ç»ä¸€ä¸ªæ–°çš„æ—…æ¸¸åœ°ç‚¹ã€‚ä½ ä»¬éƒ½çŸ¥é“æˆ‘å¾ˆæ„¿æ„åŽ»çœ‹æ–°çš„ä¸œè¥¿å’Œæ„Ÿå—æ–°çš„ç»éªŒã€‚æœ€è¿‘ï¼Œ æˆ‘å’Œå®¶é‡Œçš„äººå¼€è½¦åŽ»äº†å¼—å‰å°¼äºšçš„Blue Ridge Mountainsã€‚ å±±ä¸Šå¾ˆç¾Žï¼Œæ™¯è‰² ç‰¹åˆ«å¥½ã€‚æˆ‘ä»¬ç…§äº†å¾ˆå¤šç…§ç‰‡å’Œçœ‹è§äº†è®¸å¤šåŠ¨ç‰©ã€‚åˆæœ‰é¸Ÿ, é¹¿, ç­‰ç­‰ã€‚æˆ‘åœ¨å±±ä¸Šçš„æ—¶å€™ï¼Œä¸‹äº†ä¸€åœºé›¨ã€‚é›¨åœä¹‹åŽï¼Œçœ‹è§æœ‰ä¸¤ä¸ªå½©è™¹äº†ã€…	Hello everyone, I would like to introduce a new tourist location today. You all know that I love seeing new things and feeling new experiences. Recently, my family and I drove to the Blue Ridge Mountains in Virginia. The mountains are beautiful and the scenery is particularly good. We took a lot of pictures and saw a lot of animals. There are also birds, deer, etc. When I was on the mountain, it …	no	about a heated argument you recently had with a family member.	æˆ‘å’Œå®¶é‡Œçš„äººç»å¸¸åµæž¶ï¼Œ ç‰¹åˆ«åº”ä¸ºé’±çš„äº‹ã€‚æœ‰äº›å®¶é‡Œçš„äººå¾ˆæ„¿æ„ä¹±èŠ±é’±ï¼Œä¸åœçš„ä¹°æ²¡ç”¨çš„ä¸œè¥¿ã€‚æˆ‘è®¤ä¸ºå¥¹ä»¬ä¸éœ€è¦ä¹°å‘¢ä¹ˆå¤šéž‹å­å’Œè¡£æœï¼Œä¹°å®Œä¹‹åŽä¹Ÿä¸ä¼šå†å¤šç©¿ã€‚æˆ‘å¦¹å¦¹æƒ³ä»Žæˆ‘è¿™å€Ÿé’±æ¥ä¹°å¥¹çš„åŒ–å¦†å“å¯æ˜¯æˆ‘ä¸åŒæ„ï¼Œå¥¹ä»Žæ¥ä¸è¿˜æˆ‘å’Œå·²ç»æœ‰ä½·å¤šåŒ–å¦†å“äº†ã€‚æˆ‘è·Ÿå¥¹åµèµ·æ¥äº†ï¼Œæ‘”åäº†è®¸å¤šå¥¹çš„çŽ»ç’ƒæ¯å­ã€‚	My family and I often quarrel, especially over money. Some family members are very willing to spend money indiscriminately and keep buying useless things. I don't think they need to buy as many shoes and clothes, and they won't wear any more after buying them. My sister wants to borrow money from me to buy her makeup but I don't agree, she never pays me back and I already have too much makeup. I …	no	P95	Great info	Nothing went wrong.	only_MT	Agree	Somewhat agree	Neutral
623ac50ed58ac10f7e259b8f	English	Spanish						English				Currently use it heavily	Currently use it, but occasionally	Currently use it heavily	Used it occasionally in the past but have stopped	Used it occasionally in the past but have stopped	Currently use it heavily	Never Used it	Currently use it, but occasionally	Currently use it, but occasionally	Never Used it	Used it occasionally in the past but have stopped	Never Used it	Yes	Yes	Google	Instagram	Twitter				Spanish	es	Only MT	about something funny that happened to you during a meeting.	Algo grasioso que fue en una junta paso que a empleado se le olvido sus pantalones	Something greasy that was in a meeting happened that the employee forgot his pants	yes	about a heated argument you recently had with a family member.	Ace un rato yo y un primo estavamos allegando que my equipo de deportes era mejor que el de el.	A while ago me and a cousin were claiming that my sports team was better than his.	yes	P181	Good	No	MT_with_edit	Disagree	Agree	Disagree
6272f2124c61474d78e12c09	English	Korean						English				Currently use it, but occasionally	Used it occasionally in the past but have stopped	Currently use it, but occasionally	Never Used it	Never Used it	Currently use it heavily	Never Used it	Currently use it heavily	Used it occasionally in the past but have stopped	Currently use it, but occasionally	Currently use it, but occasionally	Used it occasionally in the past but have stopped	Yes	Yes	Google Translate	Translate					Spanish	es	MT with edit	about a bad retail experience you recently had.	Varios artÃ­culos que pedÃ­ en lÃ­nea para recogerlos en la tienda no estaban disponibles cuando lleguÃ© allÃ­.	Several items I ordered online for in-store pickup were not available when I got there.	yes	about a heated argument you recently had with a family member.	No he tenido ninguna discusiÃ³n reciente con miembros de la familia.	I have not had any recent arguments with family members.	yes	P225	ok	It all went smoothly.	MT_with_edit	Neutral	Agree	Somewhat agree
tiger22	Bangla							English				Never Used it	Currently use it heavily	Currently use it, but occasionally	Used it heavily in the past but have stopped	Never Used it	Currently use it heavily	Used it occasionally in the past but have stopped	Never Used it	Never Used it	Currently use it, but occasionally	Never Used it	Never Used it	Yes	Yes	Google Translator Via google Chrome						Bengali	bn	Manual	about a funny situation where you were distracted by your mobile phone.	à¦à¦•à¦¦à¦¿à¦¨ à¦†à¦®à¦¿ à¦°à¦¾à¦¸à§à¦¤à¦¾à§Ÿ à¦¹à¦¾à¦à¦Ÿà¦¾à¦° à¦¸à¦®à§Ÿ à¦«à§‹à¦¨ à¦šà¦¾à¦²à¦¾à¦¤à§‡ à¦—à¦¿à§Ÿà§‡ à¦¸à¦¾à¦®à¦¨à§‡ à¦¥à§‡à¦•à§‡ à¦¯à§‡ à¦¸à¦¾à¦‡à¦•à§‡à¦² à¦†à¦¸à¦›à¦¿à¦² à¦Ÿà§‡à¦°\n à¦ªà¦¾à¦‡à¦¨à¦¿, à¦†à¦®à¦¾à¦•à§‡ à¦œà¦¾à§Ÿà¦—à¦¾ à¦¦à¦¿à¦¤à§‡ à¦—à¦¿à§Ÿà§‡ à¦¸à§‡ à¦¸à¦¾à¦‡à¦•à§‡à¦² à¦¨à¦¿à§Ÿà§‡ à¦—à¦¾à¦›à§‡à¦° à¦¸à¦¾à¦¥à§‡ à¦¬à¦¾à¦°à¦¿ à¦–à§‡à§Ÿà§‡ à¦®à¦¾à¦Ÿà¦¿à¦¤à§‡ à¦ªà§œà§‡…	One day I was walking and browsing my phone; I didn't notice a cycle coming toward me, and I was supposed to give him a side. Instead, the rider tried to avoid the collision with me; he hit a tree and fell to the ground.	yes	about a heated argument you recently had with a family member.	à¦°à¦¾à¦¤à§à¦°à§‡ à¦­à¦¾à¦¤ à¦–à¦¾à¦“à§Ÿà¦¾à¦° à¦¸à¦®à§Ÿ à¦¸à¦¬à§à¦œà¦¿ à¦–à¦¾à¦¬ à¦¨à¦¾ à¦¬à¦²à§‡ à¦®à¦¾ à¦…à¦¨à§‡à¦• à¦°à¦¾à¦—à¦¾à¦°à¦¾à¦—à¦¿ à¦•à¦°à¦² à¦†à¦®à¦¾à¦° à¦¸à¦¾à¦¥à§‡à¥¤ à¦¹à¦¾à¦œà¦¾à¦°à¦Ÿà¦¾ à¦•à¦¥à¦¾ à¦¶à§à¦¨à¦¾à¦²à§‹ à¦¯à§‡ à¦¸à¦¬à§à¦œà¦¿ à¦¨à¦¾ à¦–à§‡à¦²à§‡ à¦•à¦¿ à¦•à¦¿ à¦¹à¦¬à§‡à¥¤	At dinner, my mother scolded me for not eating the vegetables. She also gave me a mouthful lecture on what will happen to me if I don't eat vegetables.	yes	P235	great info	No	manual_translation	Strongly disagree	Neutral	Somewhat disagree
tiger33	Bengali							English				Never Used it	Currently use it heavily	Used it occasionally in the past but have stopped	Currently use it, but occasionally	Never Used it	Currently use it heavily	Never Used it	Never Used it	Currently use it, but occasionally	Never Used it	Never Used it	Never Used it	No	No							Bengali	bn	Manual	about an unusal travel experience that you had.	à¦…à¦«à¦¿à¦¸à§‡ à¦®à¦¿à¦Ÿà¦¿à¦‚ à¦à¦° à¦¸à¦®à§Ÿ à¦«à§‡à¦¸à¦¬à§à¦•à§‡à¦° à¦¨à§‹à¦Ÿà¦¿à¦«à¦¿à¦•à§‡à¦¶à¦¨ à¦†à¦¸à¦¾à¦° à¦ªà¦° à¦­à§à¦²à§‡à¦‡ à¦—à¦¿à§Ÿà§‡à¦›à¦¿à¦²à¦¾à¦® à¦®à¦¿à¦Ÿà¦¿à¦‚ à¦à¦° à¦•à¦¥à¦¾	After getting a notification from Facebook during a meeting in the office, I forgot about the meeting	no	about a heated argument you recently had with a family member.	à¦†à¦®à¦¿ à¦ªà§à¦°à¦¾à§Ÿà¦‡ à¦à¦•à¦Ÿà¦¿ à¦•à¦¾à¦œ à¦•à¦°à¦¬à§‹ à¦¬à¦²à§‡ à¦•à¦°à¦¤à§‡ à¦­à§à¦²à§‡ à¦¯à¦¾à¦‡à¥¤ à¦—à¦¤à¦•à¦¾à¦² à¦†à¦®à¦¾à¦° à¦°à¦¾à¦¨à§à¦¨à¦¾ à¦•à¦°à¦¾à¦° à¦•à¦¥à¦¾ à¦›à¦¿à¦²à§‹, à¦•à¦¿à¦¨à§à¦¤à§ à¦•à¦°à¦¿ à¦¨à¦¾à¦‡à¥¤ à¦à¦‡ à¦œà¦¨à§à¦¯ à¦¬à¦‰ à¦à¦° à¦¸à¦¾à¦¥à§‡ à¦…à¦¨à§‡à¦• à¦•à¦¥à¦¾ à¦•à¦¾à¦Ÿà¦¾à¦•à¦¾à¦Ÿà¦¿ à¦¹à¦²à¥¤	I often forgot to do a job after telling, myself I will do it. Yesterday I was supposed to cook but I didn't. I had a heated argument with my wife because of that.	no	P238	great info	I did not notice anything.	manual_translation	Strongly disagree	Neutral	Neutral
tiger34	English	Nepali	Maithili	Bhojpuri	Hindi	Checha(Dialect)		English	Bhojpuri			Used it occasionally in the past but have stopped	Currently use it, but occasionally	Currently use it heavily	Currently use it, but occasionally	Never Used it	Currently use it, but occasionally	Never Used it	Never Used it	Currently use it, but occasionally	Never Used it	Never Used it	Never Used it	Yes	Yes	Google translator	Facebook translator					Nepali	ne	Only MT	about a funny situation where you were distracted by your mobile phone.	à¤¸à¤¾à¤à¤ à¤ªà¤°à¥‡à¤•à¥‹ à¤¥à¤¿à¤¯à¥‹, à¤®à¥‡à¤°à¥€ à¤¬à¤¹à¤¿à¤¨à¥€à¤²à¥‡ à¤¨à¤™ à¤¬à¤¨à¤¾à¤‡à¤°à¤¹à¥‡à¤•à¥€ à¤¥à¤¿à¤‡à¤¨à¥, à¤‰à¤¨à¤²à¥‡ à¤ à¤Ÿà¥à¤Ÿà¤¾ à¤—à¤°à¥à¤¦à¥ˆ à¤­à¤¨à¤¿à¤¨à¥ 10 à¤®à¤¿à¤¨à¥‡à¤Ÿ à¤®à¤¾à¤¤à¥à¤° à¤²à¤¾à¤—à¥à¤›, à¤¤à¤° à¤® à¤®à¥‡à¤°à¥‹ à¤«à¥‹à¤¨à¤®à¤¾ à¤­à¤¿à¤¡à¤¿à¤¯à¥‹ à¤¬à¤¨à¤¾à¤‰à¤¨à¤®à¤¾ à¤µà¥à¤¯à¤¸à¥à¤¤ à¤¥à¤¿à¤à¤à¥¤	It was evening, my sister was making nails, she jokingly said it only takes 10 minutes, but I was busy making videos on my phone.	yes	about a heated argument you recently had with a family member.	à¤®à¥‡à¤°à¥€ à¤¬à¤¹à¤¿à¤¨à¥€à¤¸à¤à¤— à¤ªà¤¹à¤¿à¤²à¥‡ à¤¨à¥ˆ à¤§à¥‡à¤°à¥ˆ à¤Ÿà¥à¤¯à¤¾à¤Ÿà¥à¤¹à¤°à¥‚ à¤›à¤¨à¥ à¤¤à¤° à¤à¤‰à¤Ÿà¤¾ à¤¥à¤ª à¤ªà¥à¤°à¤¾à¤ªà¥à¤¤ à¤—à¤°à¥à¤¨ à¤šà¤¾à¤¹à¤¨à¥à¤¥à¥‡à¤‚ à¤° à¤®à¥ˆà¤²à¥‡ à¤­à¤¨à¥‡à¤‚ à¤•à¤¿ à¤¯à¥‹ à¤§à¥‡à¤°à¥ˆ à¤› à¤° à¤‰à¤¨à¤²à¥‡ à¤ªà¤°à¥à¤–à¤¨à¥à¤ªà¤°à¥à¤›à¥¤ à¤‰à¤¨à¥€ à¤ªà¤¾à¤—à¤² à¤­à¤‡à¤¨à¥ à¤° à¤¹à¤¾à¤®à¥€ à¤à¤—à¤¡à¤¾à¤®à¤¾ à¤ªà¤°à¥à¤¯à¥Œà…	My sister already has a lot of tattoos but wanted to get one more and I said it's too much and she has to wait. She went crazy and we got into a fight.	yes	P228	good	It was fine.	only_MT	Somewhat agree	Somewhat agree	Neutral
tiger44	Nepali							English	Nepali			Used it occasionally in the past but have stopped	Currently use it heavily	Currently use it, but occasionally	Currently use it, but occasionally	Never Used it	Currently use it heavily	Never Used it	Never Used it	Used it occasionally in the past but have stopped	Used it occasionally in the past but have stopped	Used it occasionally in the past but have stopped	Never Used it	Yes	I am not sure							Nepali	ne	Manual	about a funny situation where you were distracted by your mobile phone.	à¤ªà¤°à¤¿à¤•à¥à¤·à¤¾ à¤¨à¤œà¤¿à¤• à¤†à¤à¤•à¥‹ à¤¥à¤¿à¤¯à¥‹, à¤à¤•à¤¦à¤® à¤§à¥‡à¤°à¥ˆ à¤ªà¤¢à¥à¤¨ à¤¬à¤¾à¤à¤•à¥€ à¤¥à¤¿à¤¯à¥‹ | à¤…à¤—à¤¾à¤¡à¥€ à¤•à¤¿à¤¤à¤¾à¤¬à¤¹à¤°à¥ à¤°à¤¾à¤–à¥‡à¤° à¤ªà¤¢à¥à¤¨ à¤¬à¤¸à¥‡à¤•à¥‹ à¤¥à¤¿à¤à¤, à¤à¤‰à¤Ÿà¤¾ à¤¸à¤¾à¤¥à¥€à¤•à¥‹ à¤«à¥‹à¤¨ à¤†à¤¯à¥‹ | à¤¸à¤¾à¤¥à¤¿ à¤¸à¤‚à¤— à¥§à¥« à¤®à¤¿à¤¨à¥‡à¤Ÿ à¤¬à¥‹à¤²à¥‡à¤‚, à¤¤à¥‡à¤¸à¤ªà¤›à¥€ à¤ªà¥à¤¨à¤ƒ à¤ªà¤¢à¥à¤¨ à¤¬à¤…	My exam was near, and I had a lot to study. When I started studying by placing books in front of me, a friend called me. I talked with him for 15 minutes, after that I started studying again. After some time, again, I got a message of a friend in a social media, then I started replying to that message. I got no idea how I spent hours doing that. I opened a book thinking that I had to study. After…	yes	about a heated argument you recently had with a family member.	à¤®à¤²à¤¾à¤‡ à¤…à¤¹à¤¿à¤²à¥‡ à¤ªà¤¶à¥à¤šà¤¾à¤¤à¤¾à¤ª à¤­à¤‡à¤°à¤¹à¥‡à¤•à¥‹ à¤› | à¤¤à¥à¤¯à¥‹ à¤¦à¤¿à¤¨ à¤†à¤–à¤¿à¤° à¤•à¤¿à¤¨ à¤®à¥ˆà¤²à¥‡ à¤†à¤«à¥à¤¨à¥‹ à¤®à¤¨ à¤²à¤¾à¤‡ à¤¶à¤¾à¤¨à¥à¤¤ à¤°à¤¾à¤–à¥à¤¨ à¤¸à¤•à¤¿à¤¨? à¤•à¤¿à¤¨ à¤®à¥ˆà¤²à¥‡ à¤†à¤–à¤¿à¤° à¤†à¤«à¥à¤¨à¥‹ à¤¹à¥ƒà¤¦à¤¯à¤­à¤¿à¤¤à¥à¤° à¤°à¤¾à¤–à¥‡à¤•à¥‹ à¤®à¥‡à¤°à¥‹ à¤ªà¥à¤¯à¤¾à¤°à¥‹ à¤¦à¤¾à¤œà¥ à¤¸à¤‚à¤— à¤à¤—à¤¡à¤¾ à¤—à¤°à¥‡à¤‚…	Now I am regretting. Why couldn't I keep my heart calm that day? Why did I had an argument with my dearest brother who dwells in my heart? I shouldn't have done that. Actually, the fault was mine. He scolded me in order to make me realize that I did mistake, but I went against him. I didn't accept my fault. That's why, that event ended up with an altercation. I am repenting now, so I have to apol…	yes	P231	Great info	No. everything went perfect. I kept answering to the questions asked initially, and then wrote in Nepali language first, then translated it to English. Overall, my the experiment went well.	manual_translation	Neutral	Neutral	Agree
tiger66	English	Nepali	Newari	Hindi				English	Nepali	Newari		Used it occasionally in the past but have stopped	Currently use it, but occasionally	Currently use it, but occasionally	Currently use it, but occasionally	Never Used it	Currently use it heavily	Never Used it	Currently use it, but occasionally	Currently use it, but occasionally	Never Used it	Never Used it	Never Used it	Yes	Yes	Google translate						Nepali	ne	Manual	about something funny that happened to you during a meeting.	à¤œà¥‚à¤®à¤®à¤¾ à¤•à¤¸à¥ˆà¤²à¥‡ à¤¨à¤¿ à¤•à¥à¤¯à¤¾à¤®à¥‡à¤°à¤¾ à¤“à¤¨ à¤—à¤°à¥‡à¤¨à¤¨, à¤® à¤®à¤¾à¤¤à¥à¤° à¤à¤•à¥à¤²à¥ˆ à¤•à¥à¤¯à¤¾à¤°à¤® à¤–à¥‹à¤²à¥à¤¨à¥‡ à¤®à¤¾ à¤ªà¤°à¥‡à¤›à¥à¥¤	Nobody opened their camera in zoom, I was the only one who had camera open.	yes	explaining your opinion about a political controversy.	à¤°à¤¾à¤œà¤¨à¥€à¤¤à¤¿à¤• à¤¦à¤²à¤¹à¤°à¥à¤²à¥‡ à¤•à¥‡à¤µà¤² à¤†à¤°à¥à¤¥à¤¿à¤• à¤° à¤­à¥Œà¤¤à¤¿à¤• à¤µà¤¿à¤•à¤¾à¤¸à¤•à¥‹ à¤¸à¤¾à¤¥ à¤¸à¤¾à¤¥à¥ˆ à¤à¤• à¤…à¤°à¥à¤•à¤¾ à¤ªà¥à¤°à¤¤à¤¿ à¤¸à¤¹à¤¾à¤¨à¥à¤­à¥‚à¤¤à¤¿à¤²à¥ˆ à¤ªà¤¨à¤¿ à¤®à¤¹à¤¤à¥à¤µà¥‹ à¤¦à¤¿à¤¨à¥ à¤†à¤µà¤¶à¥à¤¯à¤• à¤›à¥¤	Political parties should give importance to empathy among people along with economic and physical development.	yes	P236	good info	No	manual_translation	Neutral	Neutral	Neutral
tiger78	English	Nepali	Hindi					English	Nepali			Never Used it	Currently use it heavily	Currently use it heavily	Currently use it, but occasionally	Never Used it	Currently use it heavily	Never Used it	Never Used it	Never Used it	Never Used it	Used it occasionally in the past but have stopped	Never Used it	Yes	Yes	Google Translate						Nepali	ne	Only MT	about an unusal travel experience that you had.	à¤­à¤¾à¤°à¤¤à¤¬à¤¾à¤Ÿ à¤¨à¥‡à¤ªà¤¾à¤² à¤«à¤°à¤•à¤¨à¥‡ à¤¬à¥‡à¤²à¤¾ à¤¢à¤¿à¤²à¤¾ à¤­à¤à¤° à¤«à¤²à¤¾à¤‡à¤Ÿ à¤›à¥à¤Ÿà¥‡à¤° à¤¦à¤¿à¤¨à¤­à¤° à¤­à¥‹à¤•à¥ˆ à¤à¤…à¤°à¤ªà¥‹à¤Ÿà¤®à¤¾ à¤¬à¤¸à¤¨ à¤ªà¤°à¤¯à¥‹	When the flight from India to Nepal was delayed, the flight was delayed and I had to stay at the airport all day hungry	yes	explaining your opinion about a political controversy.	à¤® à¤¯à¥‹ à¤µà¤¿à¤·à¤¯à¤®à¤¾ à¤¬à¥‹à¤²à¤¨ à¤šà¤¾à¤¹à¤¨à¤¨	I don't want to talk about it	yes	P229	good	The first translation was not accurate	only_MT	Agree	Strongly agree	Somewhat disagree
tiger88	English	Hindi						English				Never Used it	Used it occasionally in the past but have stopped	Used it occasionally in the past but have stopped	Used it heavily in the past but have stopped	Used it occasionally in the past but have stopped	Currently use it heavily	Never Used it	Never Used it	Never Used it	Never Used it	Never Used it	Never Used it	Yes	No							Hindi	hi	Manual	about a bad retail experience you recently had.	à¤•à¥à¤› à¤¦à¤¿à¤¨à¥‹ à¤ªà¤¹à¤²à¥‡ à¤œà¤¬ à¤®à¥ˆà¤‚ à¤œà¤¼à¥‚à¤® à¤®à¥€à¤Ÿà¤¿à¤‚à¤— à¤…à¤Ÿà¥‡à¤‚à¤¡ à¤•à¤° à¤°à¤¹à¥€ à¤¥à¥€à¥¤ à¤‰à¤¸ à¤®à¥€à¤Ÿà¤¿à¤‚à¤— à¤®à¥‡à¤‚ à¤¸à¤¾à¤°à¥‡ à¤®à¥ˆà¤¨à¥‡à¤œà¤° à¤“à¤° à¤®à¥‡à¤°à¥‡ à¤•à¥‰à¤²à¥€à¤— à¤­à¥€ à¤¶à¤¾à¤®à¤¿à¤² à¤¥à¥‡à¥¤ à¤œà¤¬ à¤®à¥‡à¤¨à¥‡ à¤…à¤ªà¤¨à¥‡ à¤…à¤ªà¥à¤¡à¥‡à¤Ÿà¥‡à¤¡ à¤¦à¥‡à¤¨à¥‡ à¤šà¤¾à¤²à¥‚ à¤•à¤¿à¤ à¤¤à¤¬ à¤¸à¤¬ à¤¹à¤¸à¤¨à¥‡ à¤²à¤—à¥‡à¥¤ …	A few days before, I was attending a zoom meeting. All the manager and my colleagues were part of that meeting. When I started giving my updates, everyone started laughing. I realized that I had my voice changed in the zoom meeting and everyone was hearing a baby like voice instead of my real voice.	yes	explaining your opinion about a political controversy.	à¤¸à¥‡à¤ªà¥à¤Ÿà¥‡à¤®à¥à¤¬à¤° à¥¨à¥­, à¤®à¤¾à¤¨à¤¨à¥€à¤¯ à¤…à¤®à¤¿à¤¤ à¤¶à¤¾à¤¹ à¤¨à¥‡ à¤¯à¥‡ à¤¦à¤¾à¤µà¤¾ à¤•à¤¿à¤¯à¤¾ à¤•à¥€ à¤¹à¤¿à¤‚à¤¦à¥€ à¤•à¥‹ à¤°à¤¾à¤·à¥à¤Ÿà¥à¤°à¥€à¤¯ à¤­à¤¾à¤·à¤¾ à¤¹à¥‹à¤¶à¤¿à¤¯à¤¾à¤° à¤•à¤° à¤¦à¥‡à¤¨à¤¾ à¤šà¤¾à¤¹à¤¿à¤à¥¤ à¤®à¥à¤à¥‡ à¤²à¤—à¤¤à¤¾ à¤¹à¥ˆ à¤•à¤¿ à¤‰à¤¨à¤•à¤¾ à¤•à¤¹à¤¨à¤¾ à¤¸à¤¹à¥€ à¤¹à¥ˆ à¤•à¥à¤¯à¥‚à¤à¤•à¤¿ à¤à¤¸ à¤•à¤°à¤¨à¥‡ à¤¸à¥‡ à¤¹à¤® à¤¹à¤®à…	On September 27, honorable Amit Shah proposed that the Hindi language should be the national language. I feel like itâ€™s correct because this would keep us close to our culture and the foreign languages wonâ€™t be able to overpower India	yes	P237	great info	I made a spelling mistake in my second post	manual_translation	Somewhat disagree	Neutral	Neutral
tiger91	English	Portugese						English	Portugese			Currently use it, but occasionally	Used it heavily in the past but have stopped	Currently use it heavily	Currently use it heavily	Used it heavily in the past but have stopped	Currently use it heavily	Never Used it	Never Used it	Currently use it heavily	Currently use it heavily	Currently use it heavily	Used it occasionally in the past but have stopped	Yes	Yes	Google translate						Portugese	pt	Only MT	about an unusal travel experience that you had.	Tenho uma boa e engraÃ§ada lembranÃ§a da minha viagem na California com meus amigos. Na nossa primeira noite em Lake Tahoe, eu e mais duas amigas fomos ao banheiro do acampamento e vimos um urso! Ficamos apavoradas e tentamos nos abrigar no banheiro feminino, mas tinha um cachorro enorme. EntÃ£o corremos para o banheiro masculino, e ficamos lÃ¡ chorando atÃ© que um senhor chegou e nos deu carona …	I have a good and funny memory of my trip to California with my friends. On our first night in Lake Tahoe, two of my friends and I went to the camp bathroom and saw a bear! We were terrified and tried to take shelter in the women's bathroom, but there was a huge dog. So we ran to the men's room, and we stayed there crying until an old man came and gave us a ride to our car. At the time we were te…	yes	about a bad experience with an employer or teacher.	Durante um estÃ¡gio de verÃ£o, o meu chefe era alemÃ£o e quando ele se irritava misturava bastante o alemÃ£o com o inglÃªs. E eu nÃ£o entendia o que ele falava. EntÃ£o eu pedia para ele repetir, e ele ficava ainda mais irritado comigo. Acho que eu nÃ£o era a funcionÃ¡ria favorita hahaha	During a summer internship, my boss was German and when he got angry he mixed German and English a lot. And I didn't understand what he was talking about. So I'd ask him to repeat it, and he'd get even angrier with me. Guess I wasn't the favorite employee hahaha	yes	P230	Great info	no	only_MT	Strongly agree	Agree	Strongly agree
[truncated: 25 more columns]
