# Supplementary material
Source: ML conference proceedings conference paper supplement (https://aclanthology.org/2023.trustnlp-1.26)

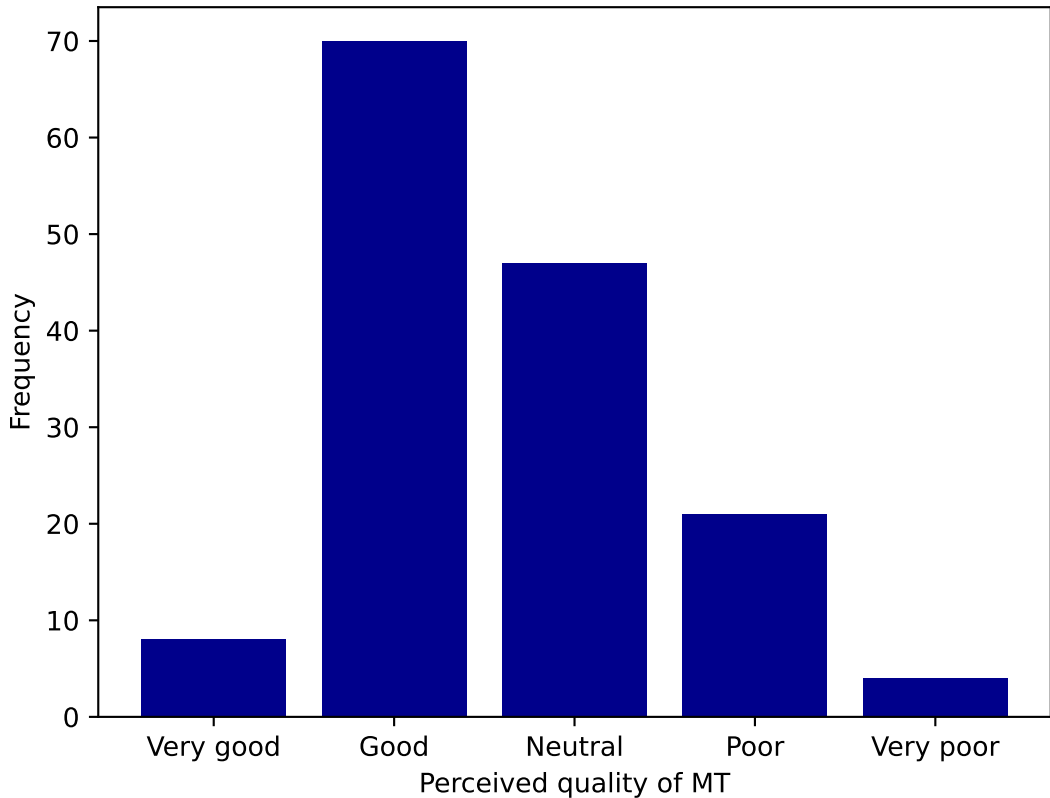

Supplement: SupplementaryMaterial [file 2023.trustnlp-1.26.SupplementaryMaterial.zip]

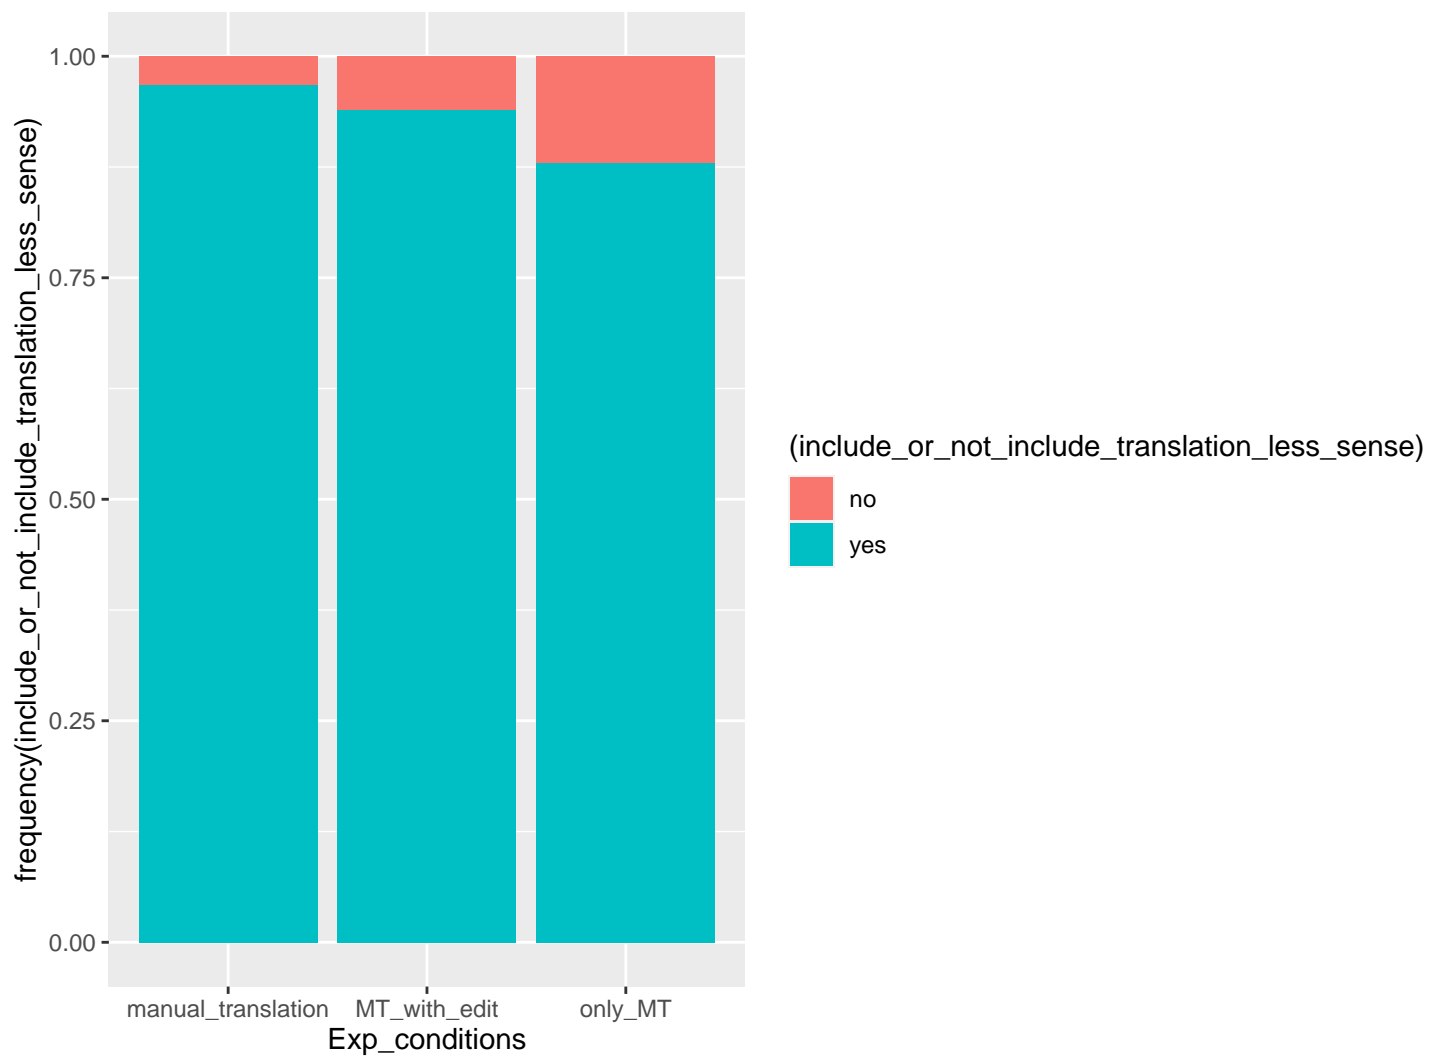

Supplement: SupplementaryMaterial [file 2023.trustnlp-1.26.SupplementaryMaterial.zip]

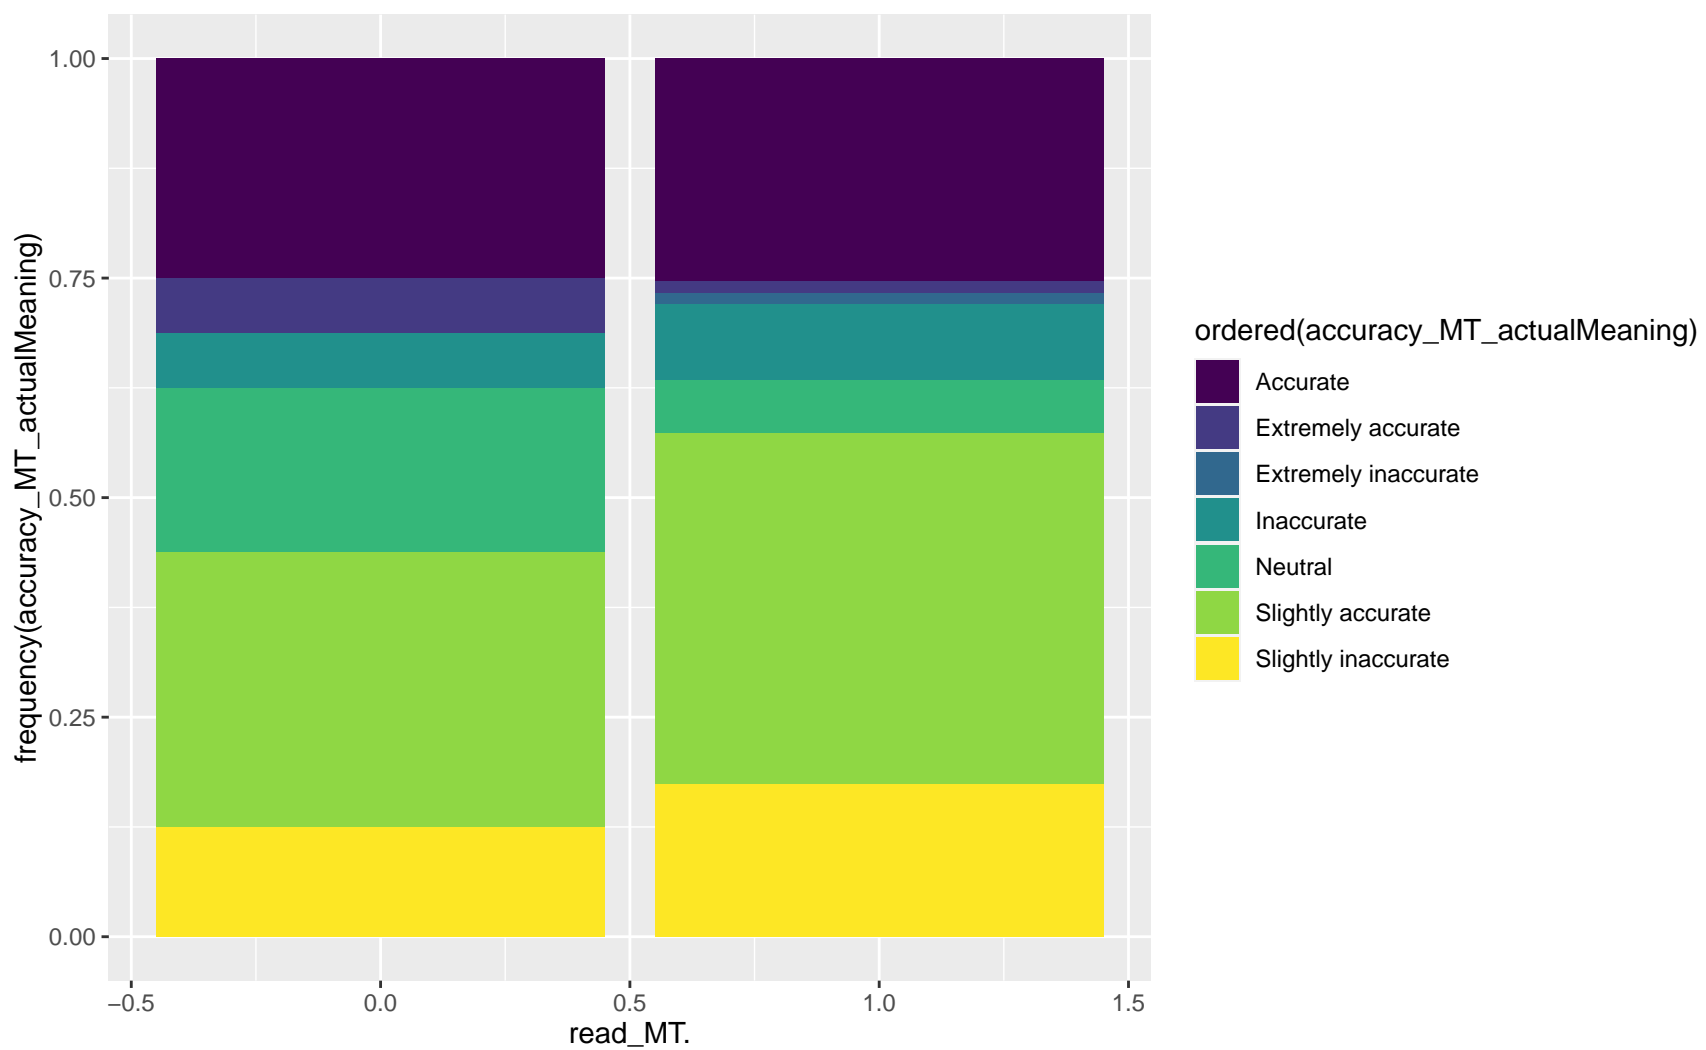

Supplement: SupplementaryMaterial [file 2023.trustnlp-1.26.SupplementaryMaterial.zip]

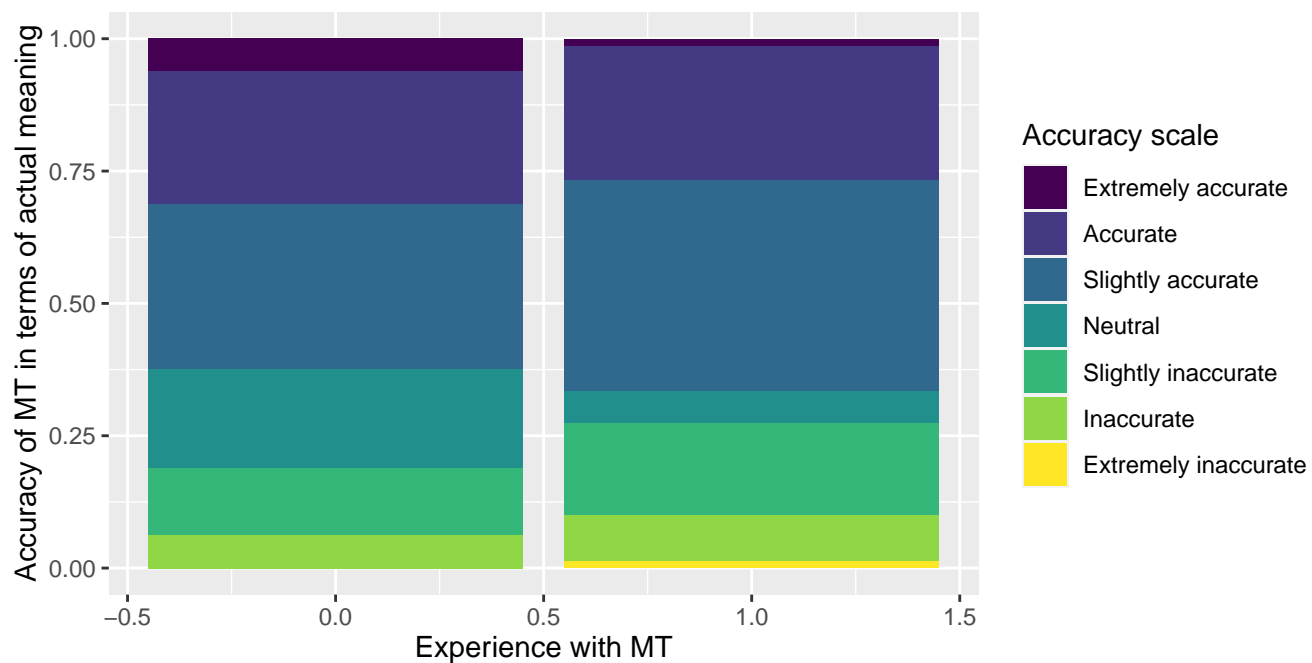

Supplement: SupplementaryMaterial [file 2023.trustnlp-1.26.SupplementaryMaterial.zip]

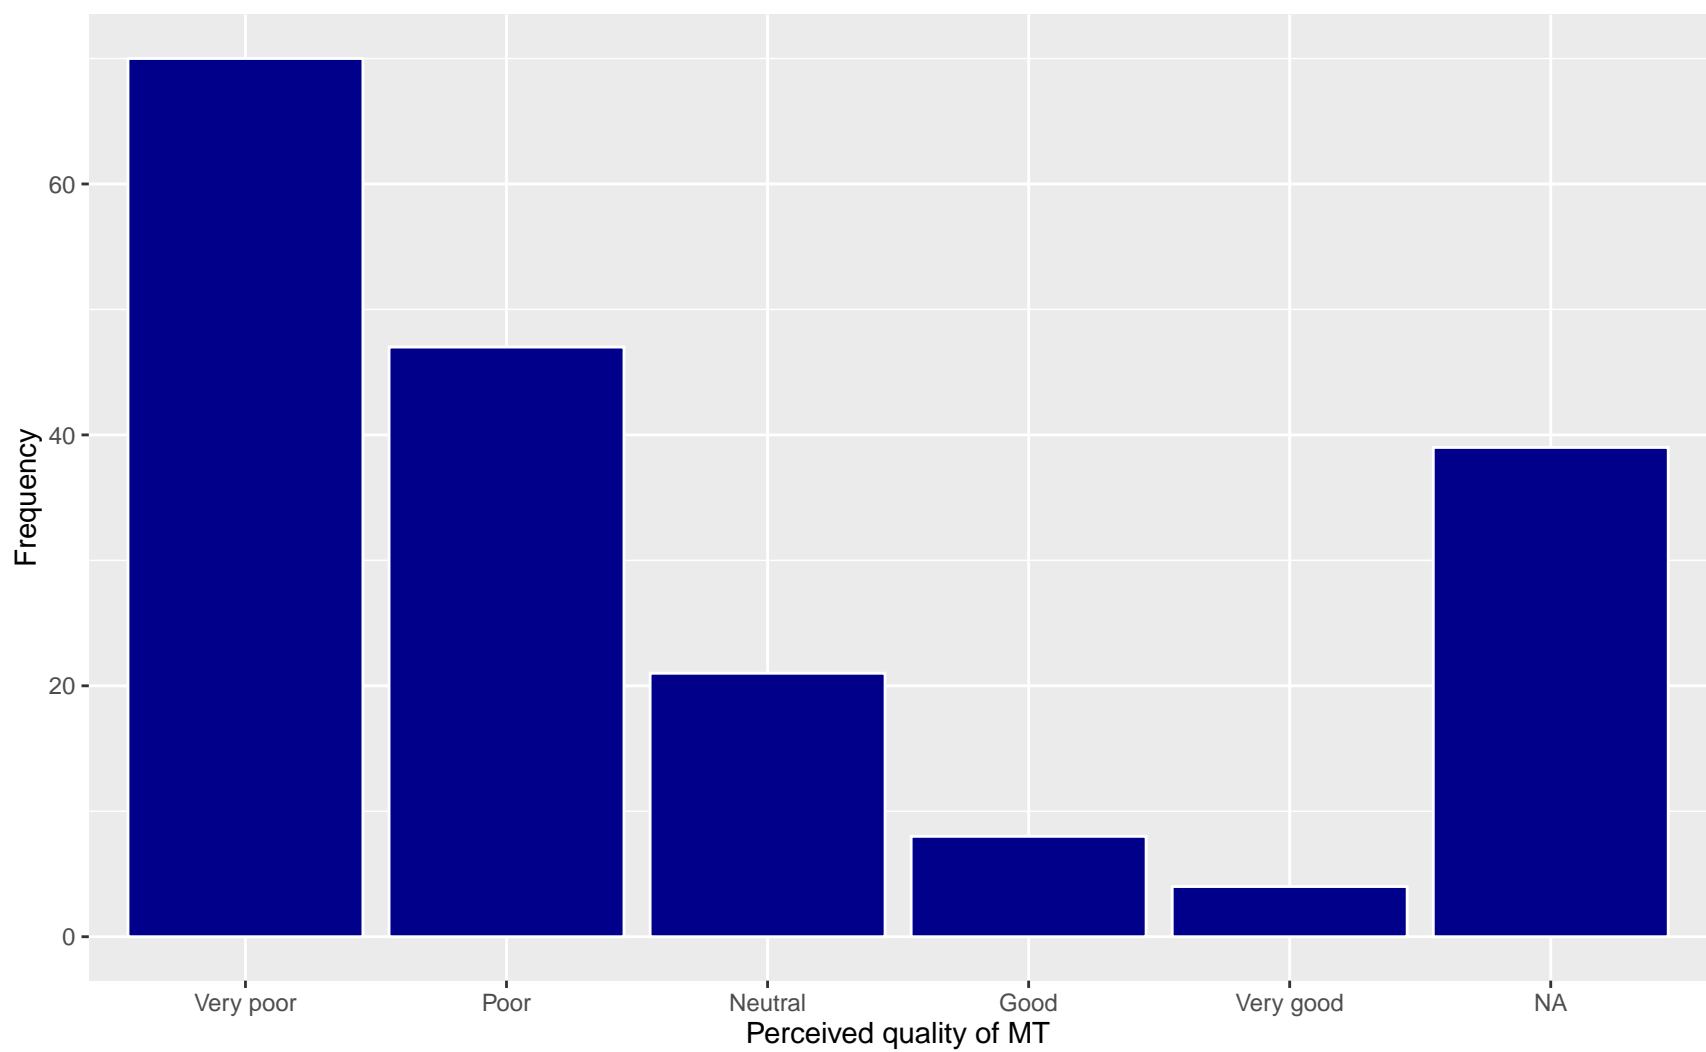

Supplement: SupplementaryMaterial [file 2023.trustnlp-1.26.SupplementaryMaterial.zip]

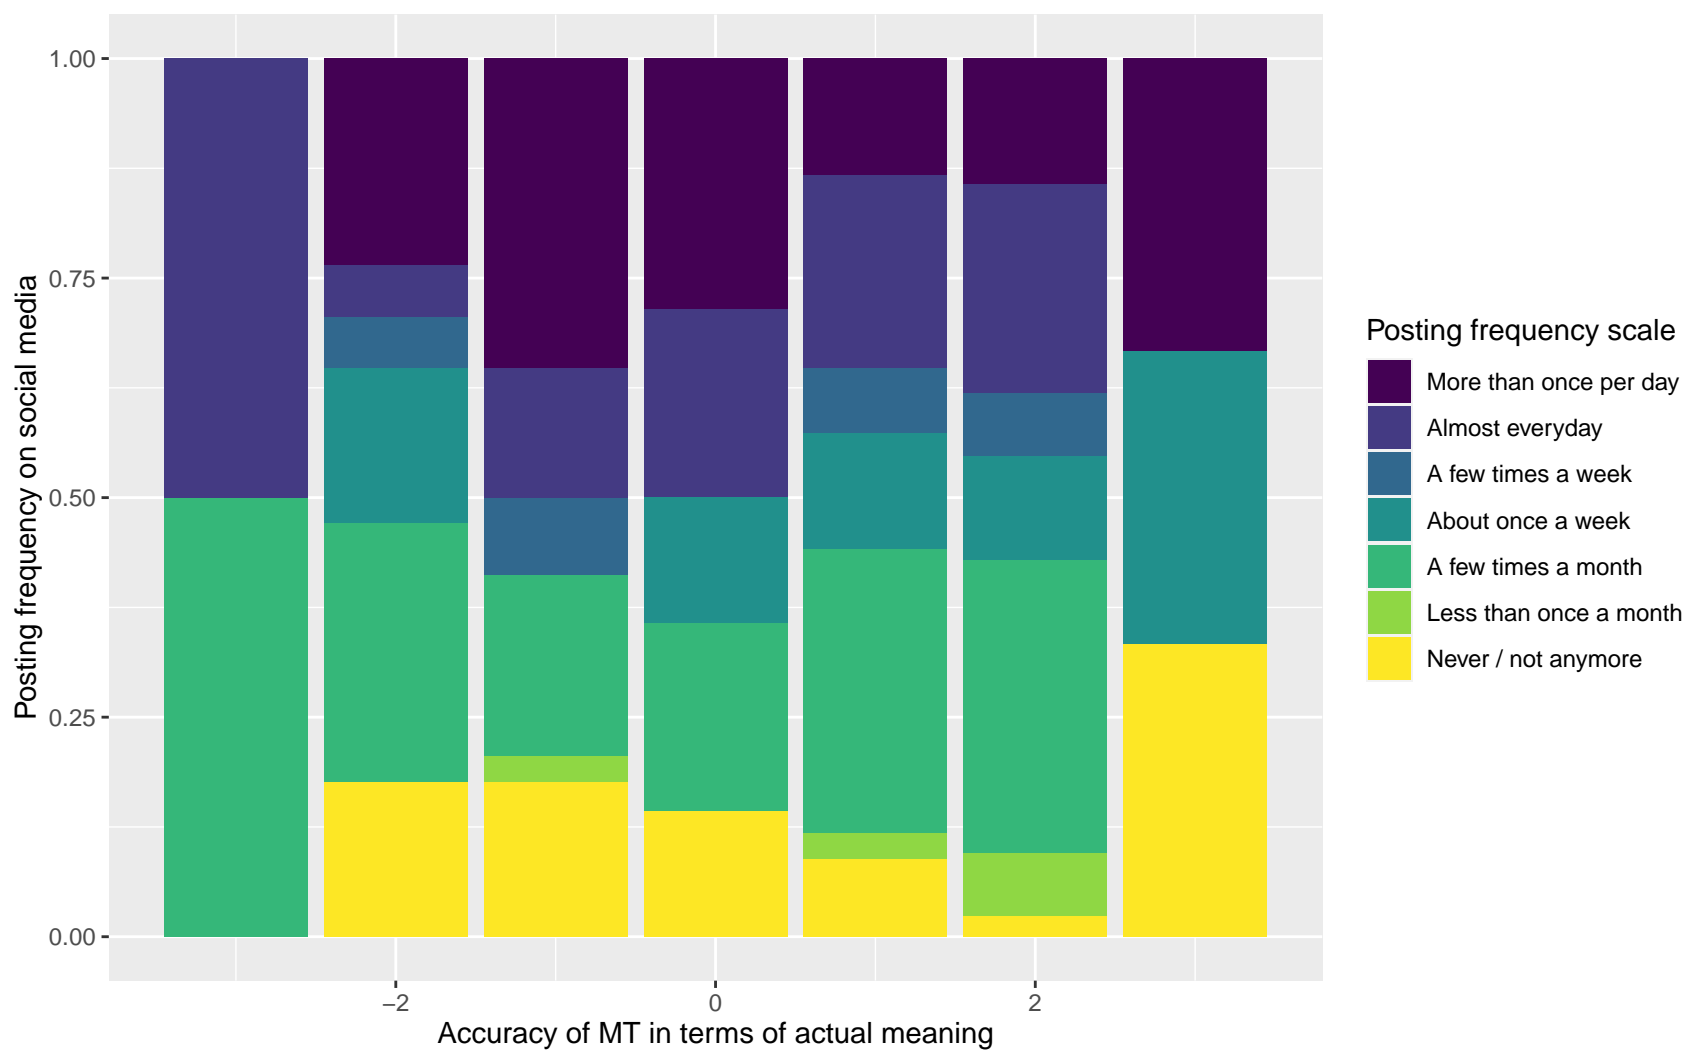

Supplement: SupplementaryMaterial [file 2023.trustnlp-1.26.SupplementaryMaterial.zip]

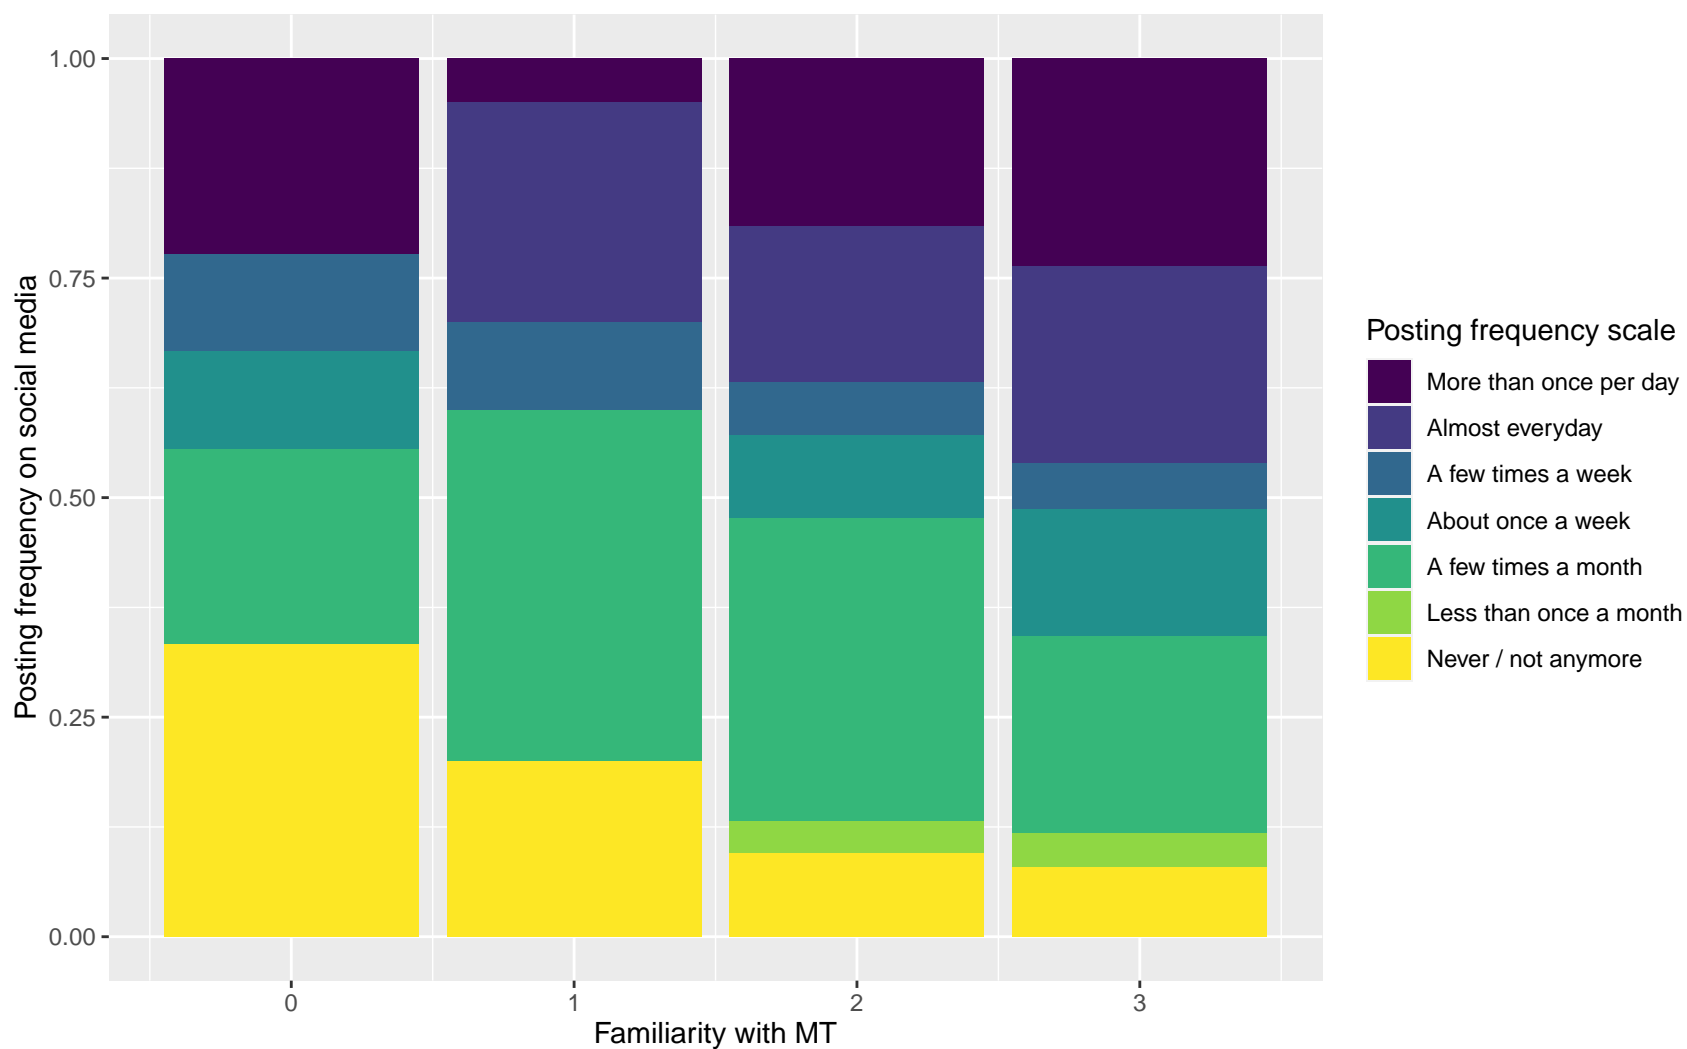

Supplement: SupplementaryMaterial [file 2023.trustnlp-1.26.SupplementaryMaterial.zip]

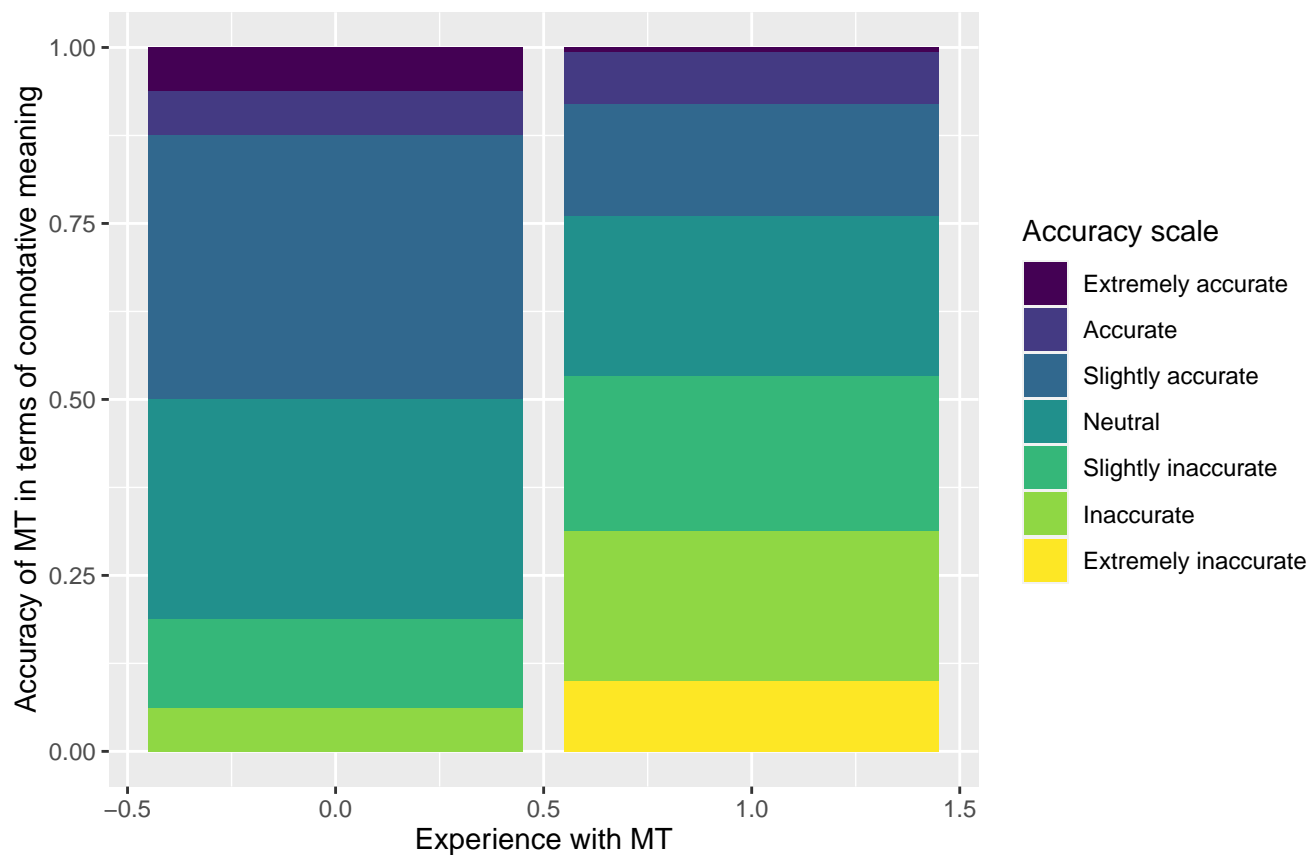

Supplement: SupplementaryMaterial [file 2023.trustnlp-1.26.SupplementaryMaterial.zip]

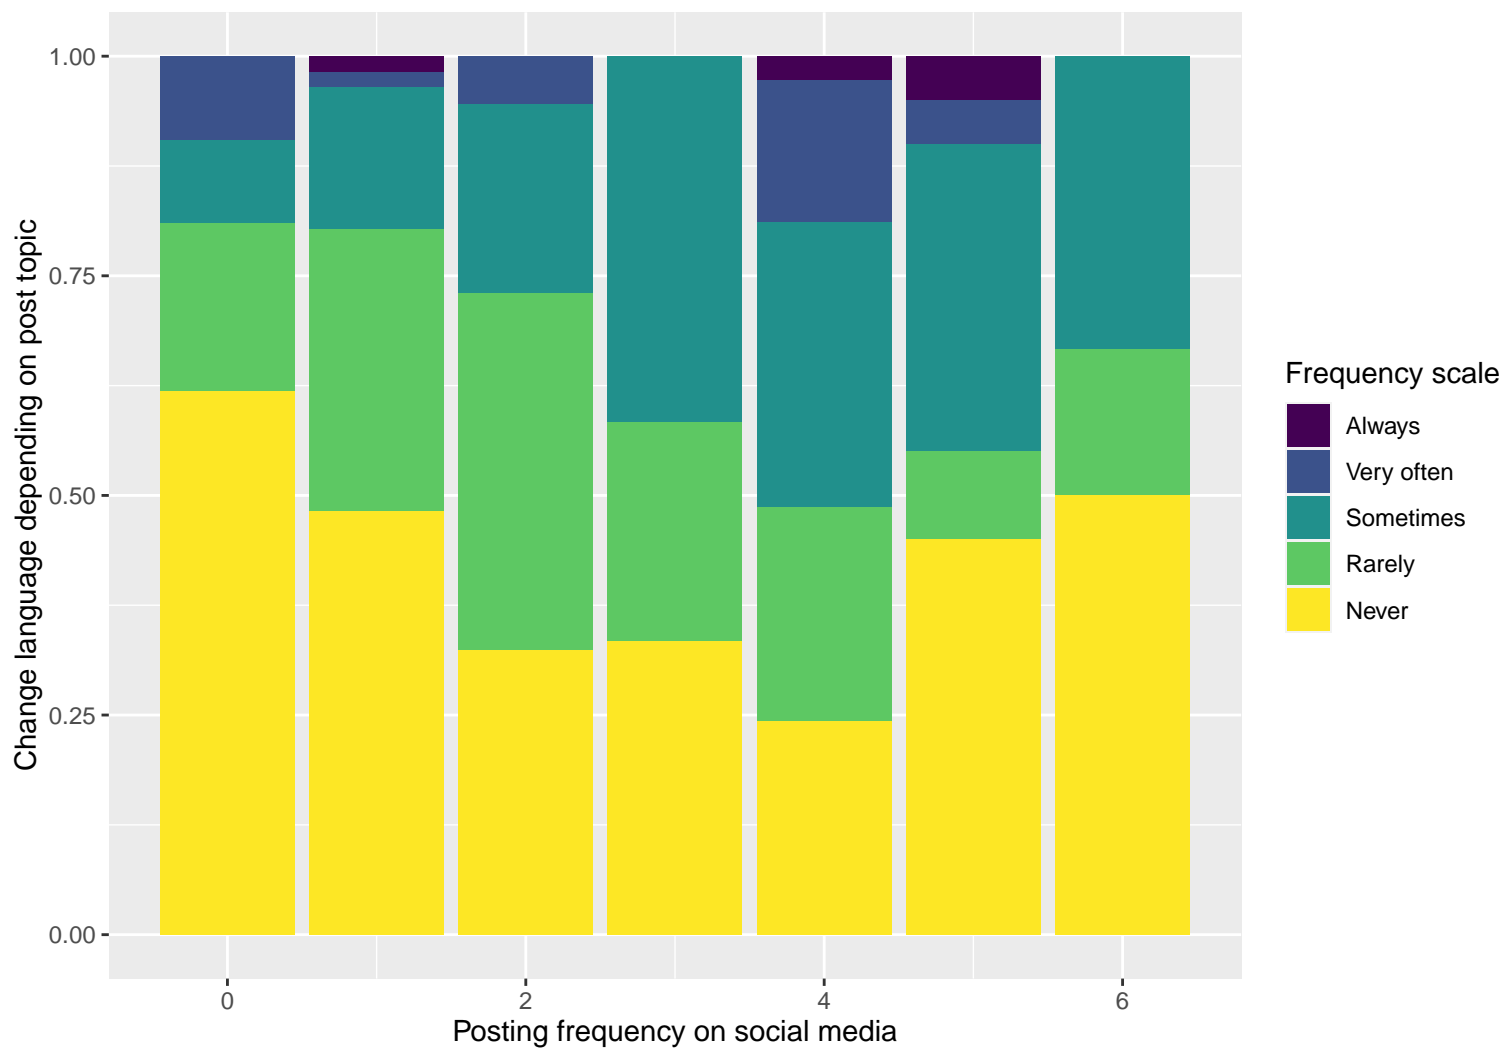

Supplement: SupplementaryMaterial [file 2023.trustnlp-1.26.SupplementaryMaterial.zip]

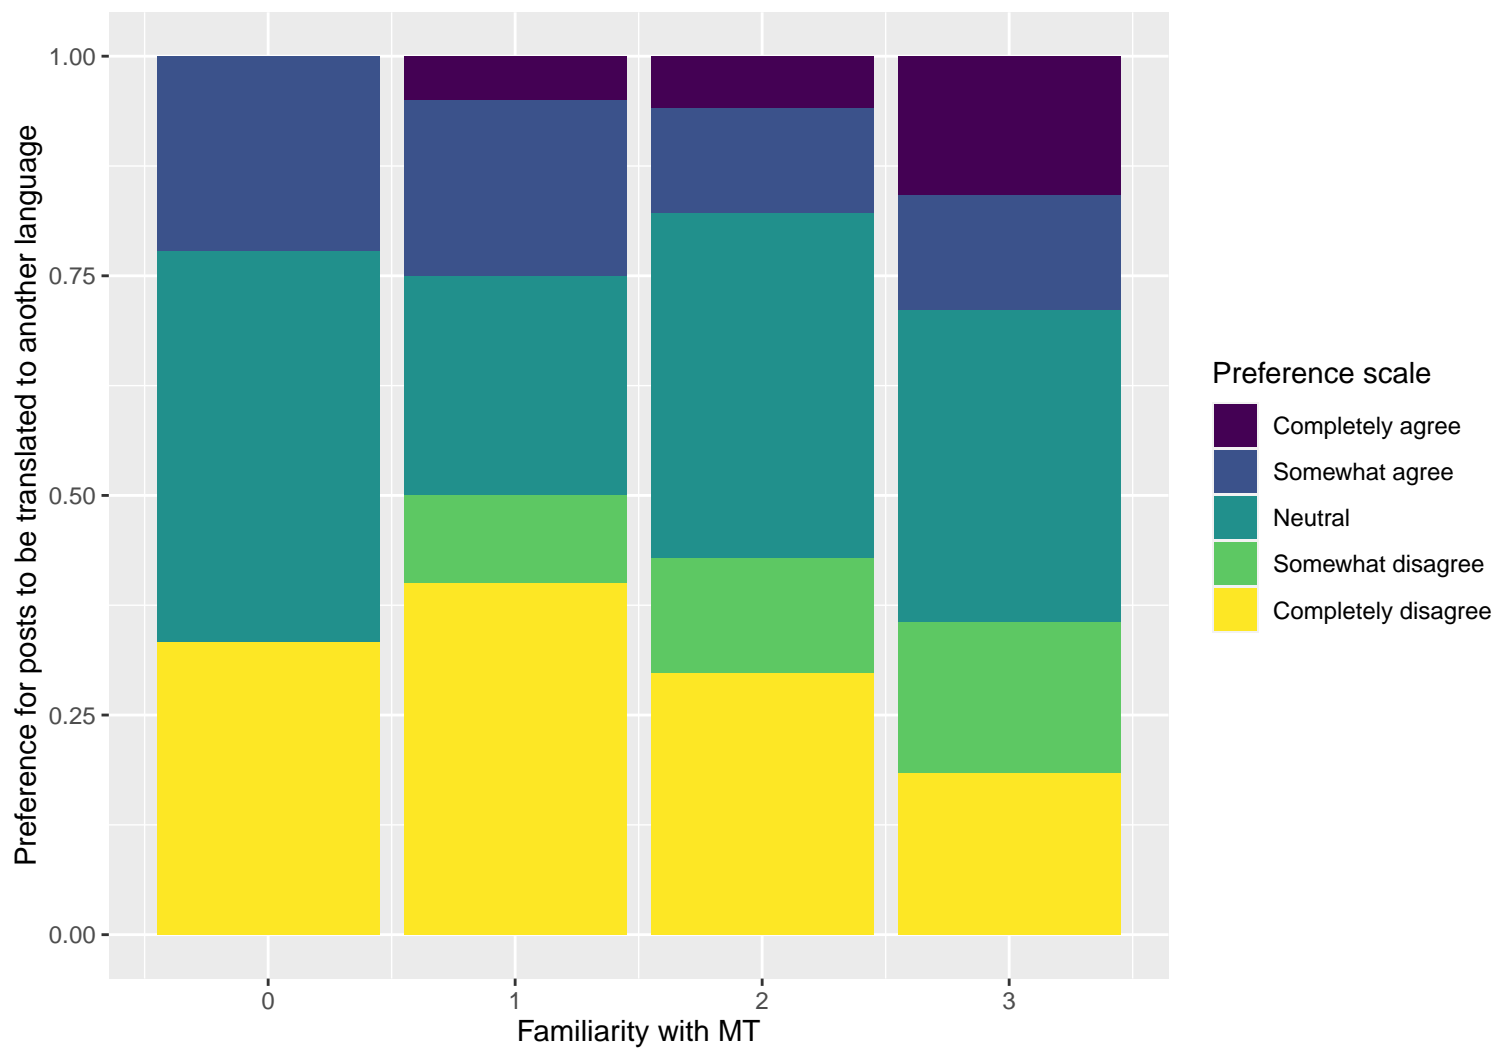

Supplement: SupplementaryMaterial [file 2023.trustnlp-1.26.SupplementaryMaterial.zip]

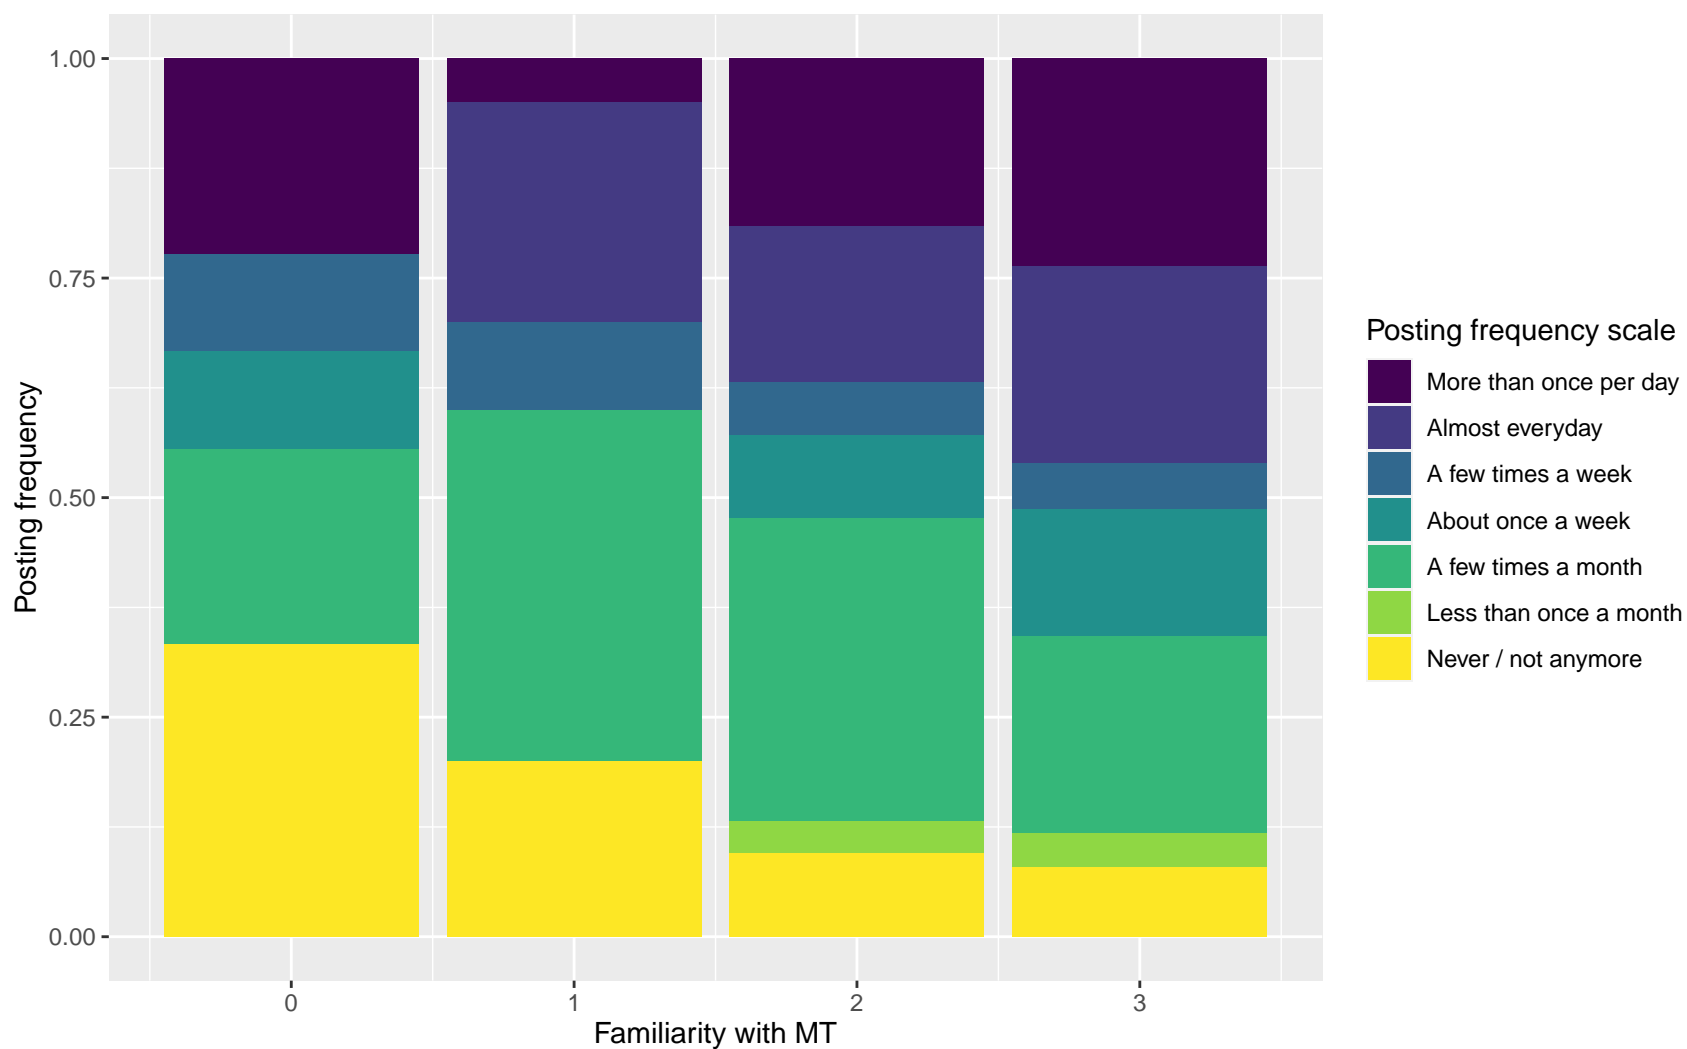

Supplement: SupplementaryMaterial [file 2023.trustnlp-1.26.SupplementaryMaterial.zip]
